# Supplementary material for: Potential of temperate agroforestry systems to deliver ecosystem services: an evidence map
Source: Copernicus journal article supplement (doi:10.5194/egusphere-2025-4619), 2025-10-02
Supplement: Supplementary file 1 [file Supplementary Tables (1).xlsx]

## Sheet: S Table 1
	Search equations WOS	Nb papers WOS	Date of search WOS	Search equations SCOPUS	Nb papers SCOPUS	Date of search SCOPUS	Nb papers after merging
Total
First search	Topic: (agroforestry OR agro-forestry OR *silvo-past* OR *silvopast* OR silvoarable OR silvo-arable OR forest-farm* OR food-forest* AND or*agro-silvicult* OR agrosilvicult* OR alley AND crop* OR agri-silvicult* OR agrisilvicult*) AND Topic:(meta-analy* OR "systematic* review*" OR "evidence map" OR "global synthesis" OR "evidence synthesis" OR "research synthesis")	153	2023-02-28	Ti_abs_key: (agroforestry OR agro-forestry OR *silvo-past* OR *silvopast* OR silvoarable OR silvo-arable OR forest-farm* OR food-forest* AND or*agro-silvicult* OR agrosilvicult* OR alley AND crop* OR agri-silvicult* OR agrisilvicult*) AND Ti_abs_key:(meta-analy* OR "systematic* review*" OR "evidence map" OR "global synthesis" OR "evidence synthesis" OR "research synthesis")	149	2023-02-28	175
Second search	Topic: (agroforestry OR agro-forestry OR *silvo-past* OR *silvopast* OR silvoarable OR silvo-arable OR forest-farm* OR food-forest* OR agro-silvicult* OR agrosilvicult* OR (alley AND crop*) OR agri-silvicult* OR agrisilvicult*) AND Topic:(meta-analy* OR "systematic* review*" OR "evidence map" OR "global synthesis" OR "evidence synthesis" OR "research synthesis")	153	2023-02-28	Ti_abs_key: (agroforestry OR agro-forestry OR *silvo-past* OR *silvopast* OR silvoarable OR silvo-arable OR forest-farm* OR food-forest* OR agro-silvicult* OR agrosilvicult* OR (alley AND crop*) OR agri-silvicult* OR agrisilvicult*) AND Ti_abs_key:(meta-analy* OR "systematic* review*" OR "evidence map" OR "global synthesis" OR "evidence synthesis" OR "research synthesis")	149	2023-02-28	175
Third search	Topic: (agroforestry OR agro-forestry OR *silvo-past* OR *silvopast* OR silvoarable OR silvo-arable OR forest-farm* OR food-forest* OR agro-silvicult* OR agrosilvicult* OR (alley AND crop*) OR agri-silvicult* OR agrisilvicult*) AND Topic:(metaanaly* OR meta-analy* OR "systematic* review*" OR "evidence map" OR "global synthesis" OR "evidence synthesis" OR "research synthesis")	206	2023-11-09	Ti_abs_key: (agroforestry OR agro-forestry OR *silvo-past* OR *silvopast* OR silvoarable OR silvo-arable OR forest-farm* OR food-forest* OR agro-silvicult* OR agrosilvicult* OR (alley AND crop*) OR agri-silvicult* OR agrisilvicult*) AND Ti_abs_key:(metaanaly* OR meta-analy* OR "systematic* review*" OR "evidence map" OR "global synthesis" OR "evidence synthesis" OR "research synthesis")	189	2023-11-09
fourth search	Topic: (agroforestry OR agro-forestry OR *silvo-past* OR *silvopast* OR silvoarable OR silvo-arable OR forest-farm* OR food-forest* OR agro-silvicult* OR agrosilvicult* OR (alley AND crop*) OR agri-silvicult* OR agrisilvicult*) AND Topic:(metaanaly* OR meta-analy* OR "systematic* review*" OR "evidence map" OR "global synthesis" OR "evidence synthesis" OR "research synthesis")	244	2024-09-21	Ti_abs_key: (agroforestry OR agro-forestry OR *silvo-past* OR *silvopast* OR silvoarable OR silvo-arable OR forest-farm* OR food-forest* OR agro-silvicult* OR agrosilvicult* OR (alley AND crop*) OR agri-silvicult* OR agrisilvicult*) AND Ti_abs_key:(metaanaly* OR meta-analy* OR "systematic* review*" OR "evidence map" OR "global synthesis" OR "evidence synthesis" OR "research synthesis")	215	2024-09-21

## Sheet: S Table 2
Criteria for inclusion	Criteria for exclusion
The paper is a meta-analysis reporting on the effects of agroforestry practices or systems on sustainability oucomes covering environment, climate and productivity aspects.	The topic of the meta-analysis is out of the scope of this review.
The original experiments synthesized by the meta-analysis include observations of agroforestry practices or systems in pedo-climates characterizing the northern emisphere, such as temperate, continental, boreal, mediterranean.	The paper is neither a systematic review nor a meta-analysis of primary research.
	The analysis is not based on pairwise comparisons
	The paper is not written in English.
	The full text is not available
	The systematic review is not presenting quantitative data (either with or without full statistical analysis)
	The study does not deal with agroforestry systems, according to its definition.
	Not including temperate data
	The comparator is only natural forests

## Sheet: S Table 3
Search	Also in	DOI	Authors	Year	Title	Abstract	Cause_exclusion	Abstract reviewer	Paper reviewer	Prisma statement codes	Double-check	Prisma statement codes	Prisma statement steps
Landscape features	iMAP-Landscape features	10.1111/ele.13576	Albrecht, M; Kleijn, D; Williams, NM; Tschumi, M; Blaauw, BR; Bommarco, R; Campbell, AJ; Dainese, M; Drummond, FA; Entling, MH; Ganser, D	2020	The effectiveness of flower strips and hedgerows on pest control, pollination services and crop yield: a quantitative synthesis	ECOLOGY LETTERS, 23(10), 1488-1498.		Andrea	Andrea	B	Andrea	B	Included after full text reading
Third search		10.3389/fsufs.2023.1167686	Baier, C; Gross, A; Thevs, N; Glaser, B	2023	Effects of agroforestry on grain yield of maize (Zea mays L.)-A global meta-analysis	Maize cropping systems, the world's most important cropping systems in terms of production volume, are responsible for many environmental problems, such as soil degradation and erosion. This calls for sustainable practises that enable environment-friendly production while generating sufficient output, as farmers and consumers worldwide depend on adequate yields. Agroforestry can offer solutions t…		Camille	Margret	B	Margret	R	Excluded after abstract reading
First search		10.1371/journal.pone.0215702	Basche A.D., DeLonge M.S.,	2019	Comparing infiltration rates in soils managed with conventional and alternative farming methods: A meta-analysis,	Identifying agricultural practices that enhance water cycling is critical, particularly with increased rainfall variability and greater risks of droughts and floods. Soil infiltration rates offer useful insights to water cycling in farming systems because they affect both yields (through soil water availability) and other ecosystem outcomes (such as pollution and flooding from runoff). For exampl…		Camille	Camille	B		Y	Excluded (after abstract reading) because not including temperate data
Kothke	Kothke	10.1088/1748-9326/aaeb5f	Cardinael, R.; Umulisa, V.; Toudert, A.; Olivier, A.; Bockel, L.; Bernoux, M.	2018	Revisiting IPCC Tier 1 coefficients for soil organic and biomass carbon storage in agroforestry systems.	Agroforestry systems comprise trees and crops, or trees and pastures within the same field. Globally, they cover approximately 1 billion hectares of land and contribute to the livelihoods of over 900 million people. Agroforestry systems have the capacity to sequester large quantities of carbon (C) in both soil and biomass. However, these systems have not yet been fully considered in the approach …		Margret	Camille	B	Camille	O	Excluded after full text reading
Second search	Kothke	10.3733/ca.2020a0015	Carey, CJ; Gravuer, K; Gennet, S; Osleger, D; Wood, SA	2020	Supporting evidence varies for rangeland management practices that seek to improve soil properties and forage production in California	California is increasingly investing in policies and programs that promote soil stewardship on natural and working lands as a way to help achieve multiple goals, including improved forage production and climate change mitigation. To inform the growing expectations for rangeland management activities to promote such services, we conducted an evidence synthesis assessing how four commonly suggested…		Camille	Camille	B	Camille
Landscape features	iMAP-Landscape features	10.1111/j.1461-0248.2011.01642.x	Chaplin-Kramer, R; O'Rourke, ME; Blitzer, EJ; Kremen, C	2011	A meta-analysis of crop pest and natural enemy response to landscape complexity	ECOLOGY LETTERS, 14(9), 922-932.		Andrea	Andrea	B	Andrea
First search	Kothke;Castle	10.1016/j.agee.2018.07.014	Chatterjee, N; Nair, PKR; Chakraborty, S; Nair, VD	2018	Changes in soil carbon stocks across the Forest-Agroforest-Agriculture/Pasture continuum in various agroecological regions: A meta-analysis	The contribution of agroforestry systems (AFS) to enhance soil organic carbon (SOC) storage in soil layers due to the presence of deep tree roots are of interest in the context of promoting carbon sinks and greenhouse gas mitigation. To quantify the relative soil C contribution from trees in agroforestry systems (AFS), this study assessed the reported differences in SOC stocks under agroforestry …			Andrea	B	Camille
First search	Kothke;Castle	10.1007/s10457-017-0147-9	De Stefano, A; Jacobson, MG	2018	Soil carbon sequestration in agroforestry systems: a meta-analysis	Agroforestry systems may play an important role in mitigating climate change, having the ability to sequester atmospheric carbon dioxide (CO2) in plant parts and soil. A meta-analysis was carried out to investigate changes in soil organic carbon (SOC) stocks at 0-15, 0-30, 0-60, 0-100, and 0 100 cm, after land conversion to agroforestry. Data was collected from 53 published studies. Results revea…			Andrea	B	Camille
Second search	iMAP-Landscape features	10.1007/s10113-021-01798-8	Drexler, S; Gensior, A; Don, A	2021	Carbon sequestration in hedgerow biomass and soil in the temperate climate zone	Hedgerows are a traditional form of agroforestry in the temperate climate zone. The establishment of hedgerows may be a promising strategy to promote carbon (C) sinks for climate change mitigation. We therefore conducted a meta-analysis compiling data from 83 sites on soil organic carbon (SOC) stocks beneath hedgerows in comparison with adjacent croplands and grasslands, plus biomass data from 64…		Andrea		B	Camille
Second search		10.1016/j.iswcr.2021.08.001	Du, X; Jian, JS; Du, C; Stewart, RD	2022	Conservation management decreases surface runoff and soil erosion	Conservation management practices - including agroforestry, cover cropping, no-till, reduced tillage, and residue return - have been applied for decades to control surface runoff and soil erosion, yet results have not been integrated and evaluated across cropping systems. In this study we collected data comparing agricultural production with and without conservation management strategies. We used…		Andrea		B	Camille
First search	Castle	10.1016/j.agee.2017.11.032	Feliciano, D; Ledo, A; Hillier, J; Nayak, DR	2018	Which agroforestry options give the greatest soil and above ground carbon benefits in different world regions?	Climate change mitigation and food security are two of the main challenges of human society. Agroforestry systems, defined as the presence of trees on external and internal boundaries, cropland, or on any other available niche of farmland, can provide both climate change mitigation and food. There are several types of agroforestry systems with different rates of above ground and soil carbon (C) s…			Andrea	B	Camille
Second search		10.3389/fenvs.2022.949185	Hernandez-Salmeron, IR; Holmgren, M	2022	Global meta-analysis: Sparse tree cover increases grass biomass in dry pastures	Agricultural and ecological droughts, extreme heat and aridity have high impacts on livestock and pasture systems worldwide. Finding ways to adapt production systems and increase biomass under these new conditions is urgently needed. The availability of tree shade in these pastures could potentially ameliorate the impacts of warm weather. Yet, the effects of tree cover on the productivity of live…		Camille	Margret	B	Andrea
Second search		10.1016/j.agee.2021.107437	Hubner, R; Kuhnel, A; Lu, J; Dettmann, H; Wang, WQ; Wiesmeier, M	2021	Soil carbon sequestration by agroforestry systems in China: A meta-analysis	China has a rich historical heritage of agroforestry, but a quantitative analysis of the potential of agroforestry systems (AFS) for soil organic carbon (SOC) sequestration is missing. A comprehensive meta-analysis of soil C sequestration rates derived from 43 studies was undertaken to determine its most influential parameters. Soil C sequestration rates were calculated for topsoils (0?20 cm, 97 …		Camille	Camille	B	Camille
Second search		10.3390/su14031296	Ivezic, V; Lorenz, K; Lal, R	2022	Soil Organic Carbon in Alley Cropping Systems: A Meta-Analysis	Population growth and an increasing demand for food cause the intensification of agriculture leading to soil degradation and a decrease in the soil organic carbon (SOC) stock. Agroforestry systems such as alley cropping are gaining more and more attention as a practice to maintain and/or increase SOC in agroecosystems. The aim of this study was to add to the knowledge on SOC in alley cropping sys…		Camille	Camille	B	Camille
Second search		10.3389/fsufs.2021.606631	Ivezic, V; Yu, Y; van der Werf, W	2021	Crop Yields in European Agroforestry Systems: A Meta-Analysis	Agroforestry is the practice of integrating woody vegetation with crops and/or livestock production in order to strengthen ecological services on farmland and achieve a more multi-functional agricultural system. Crop yields determine economic outcomes when trees are young, but information on yields is scattered in the literature and a quantitative overview of crop yields in European agroforestry …		Camille	Margret	B
Landscape features	iMAP-Landscape features	10.1002/ldr.3258	Jia, L; Zhao, W; Fu, B; Daryanto, S; Wang, S; Liu, Y; Zhai, R	2019	Effects of minimum soil disturbance practices on controlling water erosion in China's slope farmland: A meta-analysis	LAND DEGRADATION AND DEVELOPMENT, 30(6), 706-716.		Andrea	Andrea	B	Camille
First search	Kothke	10.1016/j.agee.2016.04.011	Kim, D.-G; Kirschbaum, M.U.F; Beedy, T.L.	2016	Carbon sequestration and net emissions of CH4 and N2O under agroforestry: Synthesizing available data and suggestions for future studies.					B	Camille
Third search		10.1016/j.ecoser.2023.101537	Kiran, KTM; Pal, S; Chand, P; Kandpal, A	2023	Carbon sequestration potential of agroforestry systems in Indian agricultural landscape: A Meta-Analysis	Agroforestry (AF) systems offer numerous ecosystem services and environmental benefits to humanity. Compared to conventional agricultural practices, these systems have the potential to address the impacts of climate change through carbon (C) sequestration. We examined the impacts of four dominant AF systems, viz., agrisilviculture, silvipasture, agrihortisilviculture, and agrihorticulture, on soi…		Camille	Camille	B
Second search	Kothke;Castle	10.1111/geb.13145	Ma, ZL; Chen, HYH; Bork, EW; Carlyle, CN; Chang, SX	2020	Carbon accumulation in agroforestry systems is affected by tree species diversity, age and regional climate: A global meta-analysis	Aim Agroforestry is a globally practised system of land use for achieving greater and more diverse biomass production, but it has other ecological benefits, such as mitigation of climate change. Despite this, long-term carbon (C) accumulation in different components of agroforestry systems, the drivers for C accumulation and the linkages between tree biomass and soil C stocks remain unclear. Loca…		Camille	Camille	B	Camille
Castle		10.2134/jeq2006.0462	Mayer P M, Reynolds S K. Jr, McCutchen M D, and Canfield T J. (2007). Meta-Analysis of Nitrogen Removal in Riparian Buffers. Journal of environmental quality., 36(4), pp.1172-1180.	2007	Meta-Analysis of Nitrogen Removal in Riparian Buffers				Andrea	B	Camille
Second search		10.1016/j.agee.2021.107689	Mayer, S; Wiesmeier, M; Sakamoto, E; Hubner, R; Cardinael, R; Kuhnel, A; Kogel-Knabner, I	2022	Soil organic carbon sequestration in temperate agroforestry systems - A meta-analysis	Soil organic carbon (SOC) sequestration by improved agricultural practices is an acclaimed strategy to combat climate change. Nevertheless, the aim of increasing of SOC encounters limitations, e.g. with regards to permanence of carbon storage or leakage effects in food production. Agmforestry systems (AFS) are a promising land use option that is able to sequester substantial amounts of SOC while …		Andrea	Andrea	B	Camille
other source		10.1016/j.scitotenv.2023.164094	Mónica Quevedo-Cascante, Lisbeth Mogensen, Anne Grete Kongsted, Marie Trydeman Knudsen	2023	How does Life Cycle Assessment capture the environmental impacts of agroforestry? A systematic review	In this paper, a systematic review approach was used to evaluate how environmental Life Cycle Assessment (LCA) has been applied in agroforestry in the context of food systems. This review was used as the basis for discussing methodological issues in the LCA framework for agroforestry systems (AFS) and relevant environmental outcomes in the agroforestry literature. A total of 32 LCAs in 17 countri…			Andrea	B	Margret
Second search		10.1186/s12862-021-01911-9	Mupepele, AC; Keller, M; Dormann, CF	2021	European agroforestry has no unequivocal effect on biodiversity: a time-cumulative meta-analysis	Background Agroforestry is a production system combining trees with crops or livestock. It has the potential to increase biodiversity in relation to single-use systems, such as pastures or cropland, by providing a higher habitat heterogeneity. In a literature review and subsequent meta-analysis, we investigated the relationship between biodiversity and agroforestry and critically appraised the un…		Camille	Sonja	B	Margret
First search		10.1111/j.1523-1739.2009.01350.x	Najera, A; Simonetti, JA	2010	Enhancing Avifauna in Commercial Plantations	The occurrence of fauna in commercial plantations is often associated with structural complexity. Through a meta-analysis, we tested whether the structural complexity of plantations could enhance bird species assemblages and whether bird assemblages respond differently depending on taxonomic affiliation, body size, and diet. Our analyses included 167 case studies in 31 countries in which bird ass…			Marta	B	Margret
Other sources		10.1007/s11104-023-06385-w	Ngaba, M.J.Y., Mgelwa, A.S., Gurmesa, G.A. et al.	2024	Meta-analysis unveils differential effects of agroforestry on soil properties in different zonobiomes	Aims Current comprehensive meta-analysis study aims to explore how agroforestry practices influence soil quality across different climate zones. Since numerous studies proposed agroforestry as the promising agroecological farming systems over conventional monoculture systems to maintain soil quality and to regenerate disturbed soil to counteract the negative consequences of global extensive agric…		Camille	Camille	B	Camille
Second search	Kothke	10.1007/s10457-020-00494-6	Pent, GJ	2020	Over-yielding in temperate silvopastures: a meta-analysis	Over-yielding in an intercropping system occurs when the productivity of the intercrop exceeds the overall productivity of the systems managed in segregation. The objective of this systematic review was to calculate the over-yielding of silvopastures compared to open pastures and forests, timber plantations, or orchards managed separately. A literature search was completed for comparisons of the …		Camille	Margret	B	Margret
First search		10.1016/j.jaridenv.2017.11.017	Plexida, S; Solomou, A; Poirazidis, K; Sfougaris, A	2018	Factors affecting biodiversity in agrosylvopastoral ecosystems with in the Mediterranean Basin: A systematic review	The biodiversity of Mediterranean agrosylvopastoral ecosystems has been extensively studied, because the Mediterranean Basin is a crossroad of biogeographical influences between cold temperate biota and subtropical species. Here, we systematically reviewed biodiversity studies published on natural and managed agrosylvopastoral ecosystems between 2000 and 2013 to obtain information on animal and p…			Andrea	B	Margret
First search	Kothke;Castle	10.1016/j.baae.2015.08.006	Pumarino, L; Sileshi, GW; Gripenberg, S; Kaartinen, R; Barrios, E; Muchane, MN; Midega, C; Jonsson, M	2015	Effects of agroforestry on pest, disease and weed control: A meta-analysis	Agroforestry practices may influence pest incidence and abundance both through increased top-down regulation by natural enemies and via bottom-up factors such as moderation of microclimate, soil nutrients and water content. We conducted a meta-analysis of the effects of agroforestry on the abundance of invertebrate pests, weeds, natural enemies and plant damage due to pests and diseases. We also …			David	B	Margret
First search	Kothke;Castle	10.1016/j.agee.2012.12.010	Rivest, D; Paquette, A; Moreno, G; Messier, C	2013	A meta-analysis reveals mostly neutral influence of scattered trees on pasture yield along with some contrasted effects depending on functional groups and rainfall conditions	Scattered trees occurring throughout farmland matrix are prominent features of many human-dominated landscapes around the world, especially in livestock grazing systems. They are keystone structures that may play important roles in maintaining ecosystem functions, services, and farmland biodiversity. However, scattered trees in agricultural landscapes are declining worldwide due to intensive land…			David	B	Margret
fourth search		10.1007/s13593-023-00927-3	Scordia, D; Corinzia, SA; Coello, J; Ventura, RV; Jiménez-De-Santiago, DE; Just, BS; Castaño-Sánchez, O; Arcarons, CC; Tchamitchian, M; Garreau, L; Emran, M; Mohamed, SZ; Khedr, M; Rashad, M; Lorilla, RS; Parizel, A; Mancini, G; Iurato, A; Ponsa, S; Dimauro, C; Gresta, F; Cosentino, SL; Testa, G	2023	Are agroforestry systems more productive than monocultures in Mediterranean countries? A meta-analysis	Agroforestry is gaining interest due to its potential in enhancing climate resilience and sustainability of farming systems. In this meta-analysis, the crop yield in agroforestry system compared to the control (sole crop) from thirty-six experimental field trials in Mediterranean countries was assessed. The response variable Wlog(RR) (i.e., the weighted natural logarithm of the response ratio) wa…		Camille	Camille	B	Margret
First search	Kothke;Castle	10.1002/ldr.3136	Shi, LL; Feng, WT; Xu, JC; Kuzyakov, Y	2018	Agroforestry systems: Meta-analysis of soil carbon stocks, sequestration processes, and future potentials	Agroforestry (AF) has the potential to restore degraded lands, provide a broader range of ecosystem goods and services such as carbon (C) sequestration and high biodiversity, and increase soil fertility and ecosystem stability through additional C input from trees, erosion prevention, and microclimate improvement. Advantages and processes for global C sequestration in AF are unknown. We used a me…			Andrea	B	Camille
First search	Kothke	10.1016/j.agsy.2019.102676	Staton T., Walters R.J., Smith J., Girling R.D.,	2019	Evaluating the effects of integrating trees into temperate arable systems on pest control and pollination,	Agroforestry systems, which incorporate trees into agricultural land, could contribute to sustainable agricultural intensification as they have been shown to increase land productivity, biodiversity and some regulating ecosystem services. However, the effect of temperate agroforestry systems on pest control and pollination services has not been comprehensively reviewed, despite the importance of …			Andrea	B	Margret
First search		10.1016/j.scitotenv.2018.01.104	Sun, D; Yang, H; Guan, DX; Yang, M; Wu, JB; Yuan, FH; Jin, CJ; Wang, AZ; Zhang, YS	2018	The effects of land use change on soil infiltration capacity in China: A meta-analysis	Land use changes are often considered to be the main factors influencing soil infiltration. But the difference of soil infiltration capacity for different land use type is less clear. In this paper, we conduct a meta-analysis of all 42 papers that could be found associated with the effects of land use changes on soil infiltration capacity. The results showed that soil initial and steady infiltrat…			Andrea	B	Camille
First search	Kothke	10.1016/j.agee.2016.06.002	Torralba, M; Fagerholm, N; Burgess, PJ; Moreno, G; Plieninger, T	2016	Do European agroforestry systems enhance biodiversity and ecosystem services? A meta-analysis	Agroforestry has been proposed as a sustainable agricultural system over conventional agriculture and forestry, conserving biodiversity and enhancing ecosystem service provision while not compromising productivity. However, the available evidence for the societal benefits of agroforestry is fragmented and does often not integrate diverse ecosystem services into the assessment. To upscale existing…			Andrea	B	Margret
Castle		10.1016/j.agee.2017.04.015	Van Vooren L ; Reubens B ; Broekx S ; De Frenne P ; Nelissen V ; Pardon P ; Verheyen K ;	2017	Ecosystem service delivery of agri-environment measures: A synthesis for hedgerows and grass strips on arable land	In north western Europe, agricultural systems are generally managed to maximize the potential delivery of provisioning ecosystem services. This has often been at the expense of other ecosystem services. Because the current supply of most ecosystem services is insufficient to meet the increasing demand, particular attention to ecosystem service delivery and hence multifunctionality in agriculture …			Sonja	B	Margret
Third search	Kothke;Castle	10.1016/j.agsy.2016.06.007	Van Vooren, L; Reubens, B; Broekx, S; Pardon, P; Reheul, D; van Winsen, F; Verheyen, K; Wauters, E; Lauwers, L	2016	Greening and producing: An economic assessment framework for integrating trees in cropping systems	Environmental measures in an agricultural context often lead to extra constraints in current farming. This suggests trade-offs between the environmental objectives and profitability. Whether trade-offs exist, or may be turned into win-win, depends on creative farm options to comply new constraints. This paper concentrates on Ecological Focus Areas as a new EU Common Agricultural Policy greening r…		Camille	Andrea	B	Margret
fourth search		10.1111/gcb.17036	Visscher, AM; Meli, P; Fonte, SJ; Bonari, G; Zerbe, S; Wellstein, C	2024	Agroforestry enhances biological activity, diversity and soil-based ecosystem functions in mountain agroecosystems of Latin America: A meta-analysis	Mountain agroecosystems in Latin America provide multiple ecosystem functions (EFs) and products from global to local scales, particularly for the rural communities who depend on them. Agroforestry has been proposed as a climate-smart farming strategy throughout much of the region to help conserve biodiversity and enhance multiple EFs, especially in mountainous regions. However, large-scale synth…		Camille	Camille	B
Landscape features	iMAP-Landscape features	10.1016/j.scitotenv.2018.07.124	Xiong, M; Sun, R; Chen, L	2018	Effects of soil conservation techniques on water erosion control: A global analysis	SCIENCE OF THE TOTAL ENVIRONMENT, 645, 753-760.		Andrea	Andrea	B	Camille
Third search		10.1016/j.agsy.2023.103705	Yang, T; Ouyang, XY; Wang, B; Tian, D; Xu, C; Lin, ZY; Ge, XM; Tang, LZ	2023	Understanding the effects of tree-crop intercropping systems on crop production in China by combining field experiments with a meta-analysis	CONTEXT: Tree-crop intercropping (TCI) systems have many environmental benefits in addition to providing direct economic benefits from trees and crops. An increasing number of field experiments have provided rich basic data on crop production in TCI systems in China. However, there are fewer quantitative analysis studies on a national scale.OBJECTIVE: The purpose of this study was to investigate …		Camille	Margret	B	Margret
Landscape features	iMAP-Landscape features	10.1007/s11356-020-08988-7	Zheng, YL; Wang, HY; Qin, QQ; Wang, YG	2020	Effect of plant hedgerows on agricultural non-point source pollution: a meta-analysis	ENVIRONMENTAL SCIENCE AND POLLUTION RESEARCH, 27(20), 24831-24847.		Andrea	Andrea	B	Camille
Bellouin	Kothke-Castle	10.1111/1365-2664.12943	Prevedello, J. A., Almeida_Gomes, M., & Lindenmayer, D. B. (2018). The importance of scattered trees for biodiversity conservation. A global meta_analysis._Journal of Applied Ecology,_55(1), 205-214.	2018	The importance of scattered trees for biodiversity conservation: A global meta-analysis	Scattered trees are thought to be keystone structures for biodiversity in landscapes world-wide. However, such trees have been largely neglected by researchers and their importance for biodiversity remains unclear. We completed a global meta-analysis to quantify relationships between scattered trees and the species richness, abundance and composition of vertebrates, arthropods and plants. First, …		Andrea	Camille	B
Kothke	Kothke;Castle	10.1007/s11104-019-04377-3	Zhu, X.A; Liu, W.J; Chen, J; Bruijnzeel, L.A; Mao, Z; Yang, X.D; Cardinael, R; Meng, F.R; Sidle, R.C; Seitz, S; Nair, V.D; Nanko, K; Zou, X; Chen, C.F; Jiang, X.J.	2020	Reductions in water, soil and nutrient losses and pesticide pollution in agroforestry practices: a review of evidence and processes.	Background and aims Agroforestry systems combining trees with crops or pastures have been widely used to reduce water, soil, and nutrient losses and associated water pollution from agricultural lands in both temperate and tropical regions. However, reviews on improvement/efficiency and the scope of such reductions by soil, management, climate, and hydrological processes are limited. Methods This …		Margret	Camille	B	Camille
First search	Kothke	10.1007/978-3-319-58789-9_4	Bayala J., Kalinganire A., Sileshi G.W., Tondoh J.E.,	2018	Soil organic carbon and nitrogen in agroforestry systems in sub-Saharan Africa: A review,	Effective nutrient management is a key to sustainable agroforestry systems, chiefly in the current context of changing and variable climate along with increasing uncertainties of production systems to meet the needs for food security. The diversity of agroforestry systems throughout Sub-Saharan Africa results in a diverse nutrient management models with specific underlying mechanisms. Over the pa…	Not including temperate data	Camille	Camille	Y
First search	Kothke	10.1016/j.jaridenv.2011.10.011	Bayala, J; Sileshi, GW; Coe, R; Kalinganire, A; Tchoundjeu, Z; Sinclair, F; Garrity, D	2012	Cereal yield response to conservation agriculture practices in drylands of West Africa: A quantitative synthesis	To address the decline in crop productivity in the drylands of West Africa, many initiatives have focused on combating soil degradation. Various practices including (1) parkland trees associated with crops, (2) coppicing trees, (3) green manure, (4) mulching. (5) crop rotation and intercropping, and (6) traditional soil/water conservation have been tested. The present study attempts to provide a …	Not including temperate data		David	Y
Second search		10.1111/cobi.13779	Bennett, RE; Sillett, TS; Rice, RA; Marra, PP	2022	Impact of cocoa agricultural intensification on bird diversity and community composition	To meet the growing demand for chocolate, cocoa (Theobroma cacao) agriculture is expanding and intensifying. Although this threatens tropical forests, cocoa sustainability initiatives largely overlook biodiversity conservation. To inform these initiatives, we analyzed how cocoa agriculture affects bird diversity at farm and landscape scales with a meta-analysis of 23 studies. We extracted 214 Hed…	Not including temperate data	Camille	Camille	Y
Second search		10.1002/cl2.1167	Castle, SE; Miller, DC; Ordonez, PJ; Baylis, K; Hughes, K	2021	The impacts of agroforestry interventions on agricultural productivity, ecosystem services, and human well-being in low- and middle-income countries: A systematic review	Background Agroforestry, the intentional integration of trees or other woody perennials with crops or livestock in production systems, is being widely promoted as a conservation and development tool to help meet the 2030 UN Sustainable Development Goals. Donors, governments, and nongovernmental organizations have invested significant time and resources into developing and promoting agroforestry p…	Not including temperate data	Camille	Margret	Y
fourth search		10.1111/icad.12755	Centeno-Alvarado, D; Lopes, AV; Arnan, X	2024	Shaping pollinator diversity through coffee agroforestry management: A meta-analytical approach	Pollinator diversity plays an important role in improving the resilience of pollination services. However, agricultural intensification is causing declines in pollinator diversity. Such losses could be mitigated and even reversed by agroforestry systems, whose structural complexity exceeds that of intensive agricultural systems. Research, primarily conducted in tropical regions, suggests that eff…	Not including temperate data	Camille	Camille	Y
fourth search		10.1016/j.gecco.2024.e02914	Cervantes-López, MD; Morante, JC	2024	A global meta-analysis on patterns of amphibian and reptile diversity in agroforestry systems	Global herpetofauna faces threats by habitat loss and degradation, with amphibian and reptile species maintenance in human-modified landscapes not only depending on forest remnants, but also on biodiversity-friendly matrices, such as agroforestry systems. Nevertheless, herpetological studies in agroforests are limited, hindering conservation decisions. To fill this gap, we conducted a global meta…	Not including temperate data	Camille	Camille	Y
Kothke	Kothke	10.1016/j.still.2018.02.015	Corbeels, M.; Cardinael, R.; Naudin, K.; Guibert, H.; Torquebiau, E.	2019	The 4 per 1000 goal and soil carbon storage under agroforestry and conservation agriculture systems in sub-Saharan Africa.	The 4 parts per thousand initiative launched by the French government at COP21 in Paris in December 2015 aspires to increase global soil organic carbon (SOC) stocks at a rate of 0.4% per year. We conducted a systematic literature review on SOC storage under agroforestry and conservation agriculture systems in sub-Saharan Africa, where we reported 66 and 33 cases for both systems respectively. The…	Not including temperate data	Margret	Camille	Y
First search	Kothke	10.1016/j.agee.2013.05.003	De Beenhouwer, M; Aerts, R; Honnay, O	2013	A global meta-analysis of the biodiversity and ecosystem service benefits of coffee and cacao agroforestry	In tropical regions, the extent of agricultural land is rapidly increasing at the expense of natural forest with associated losses of biodiversity and ecosystem services. Agroforestry has long been proposed as a more sustainable agricultural system, conserving biodiversity and ecosystem services, while providing significant local livelihood. In this context, cacao and coffee agroforestry is often…	Not including temperate data		David	Y
Third search		10.1071/AN22313	de Oliveira, AF; Menezes, GL; Gonçalves, LC; de Araújo, VE; Ramirez, MA; Guimaraes, RG; Jayme, DG; Lana, AMQ	2023	Effects of shading on tropical grass characteristics and cattle performance in silvopastoral systems: systematic review and meta-analysis	Context. Shading reduces forage mass and can reduce animal production and profitability per area in silvopastoral systems (SPSs) with tropical grasses. This reduction in profitability is the main obstacle to using such systems. Aims. This study evaluated the effects of shading by different tree arrangements on tropical grass characteristics and cattle performance in SPSs. Methods. Systematic sear…	Not including temperate data	Camille	Camille	Y
Second search		10.1016/j.livsci.2022.104973	de Oliveira, AF; Menezes, GL; Goncalves, LC; de Araujo, VE; Ramirez, MA; Junior, RG; Jayme, DG; Lana, AMQ	2022	Pasture traits and cattle performance in silvopastoral systems with Eucalyptus and Urochloa: Systematic review and meta-analysis	This study evaluated pasture traits and cattle performance in silvopastoral systems (SPSs) with Eucalyptus spp. and Urochloa spp. through a systematic review and meta-analysis. Systematic searches of databases, scientific journals and references of selected articles found 2,639 articles, of which 29 (120 comparisons) were selected. Comparisons were classified according to the covariates of distan…	Not including temperate data	Andrea	Camille	Y
Third search		10.2478/aoas-2023-0002	De-Sousa, KT; Deniz, M; Dittrich, JR; Hötzel, MJ	2023	Effects of tree arrangements of silvopasture system on behaviour and performance of cattle: a systematic review	This review aimed to provide a critical and systematic evaluation of the scientific literature about the effect of tree arrangements of the silvopasture system on the thermal environment, behaviour, and performance of cattle. We conducted a search using Web of Science and Google Scholar to identify the key literature of the theme. Peer-reviewed published articles written in English, comparing one…	Not including temperate data	Camille	Camille	Y
Kothke	Kothke	10.1111/btp.12736	Farneda, F.Z; Meyer, C.F.J; Grelle, C.E.V.	2019	Effects of land-use change on functional and taxonomic diversity of Neotropical bats.	Human land-use changes are particularly extensive in tropical regions, representing one of the greatest threats to terrestrial biodiversity and a key research topic in conservation. However, studies considering the effects of different types of anthropogenic disturbance on the functional dimension of biodiversity in human-modified landscapes are rare. Here, we obtained data through an extensive r…	Not including temperate data	Margret	Camille	Y
First search	Kothke	10.1007/s13593-018-0533-3	Felix, GF; Scholberg, JMS; Clermont-Dauphin, C; Cournac, L; Tittonell, P	2018	Enhancing agroecosystem productivity with woody perennials in semi-arid West Africa. A meta-analysis	Soil degradation in semi-arid West Africa can be reversed through an intensified application of organic matter, especially on coarse soils. Woody perennials have been promoted in the region to secure organic matter sources and improve soil productive capacity, yet the mechanisms by which perennials provide benefits to soils and crops remain poorly understood, and no effective, generalizable agron…	Not including temperate data		Andrea	Y
Second search		10.1007/s10457-022-00734-x	Huang, IY; James, K; Thamthanakoon, N; Pinitjitsamut, P; Rattanamanee, N; Pinitjitsamut, M; Yamklin, S; Lowenberg-DeBoer, J		Economic outcomes of rubber-based agroforestry systems: a systematic review and narrative synthesis	A systematic review was conducted to examine expected economic outcomes of rubber-based agroforestry systems during mature rubber stage in comparison with monoculture rubber farming. Twelve studies were identified for a narrative synthesis of economic outcomes of the mature rubber production systems. The review found that whilst monoculture rubber production may produce higher income in some case…	Not including temperate data	Andrea	Camille	Y
First search	Kothke	10.1016/j.foreco.2007.06.014	Ilstedt, U; Malmer, A; Elke, V; Murdiyarso, D	2007	The effect of afforestation on water infiltration in the tropics: A systematic review and meta-analysis	Soil water infiltration influences groundwater recharge and potential top soil loss by erosion, as well as the partitioning of runoff into slow flow and quick flow. The aim of the work presented here was to critically review studies of the effects of afforestation on infiltrability in the tropics, using a systematic review approach to select peer-reviewed articles published in English and French.…	Not including temperate data		Marta	Y
First search	Kothke	10.1016/j.ecolecon.2017.04.019	Jezeer, R. E., Verweij, P. A., Santos, M. J., & Boot, R. G.	2017	Shaded Coffee and Cocoa - Double Dividend for Biodiversity and Small-scale Farmers	This paper compares financial and biodiversity performance of small-scale shaded coffee and cocoa plantations versus intensified conventional ones. We conduct a meta-analysis including 23 studies on coffee and cocoa plantations over a 26 year period. Our results show that, contrary to common perceptions, profitability and cost-efficiency are higher for small-scale shaded systems. Despite the lowe…	Not including temperate data		Andrea	Y
First search	Kothke	10.1007/s13593-019-0589-8	Kuyah, S; Whitney, CW; Jonsson, M; Sileshi, GW; Oborn, I; Muthuri, CW; Luedeling, E	2019	Agroforestry delivers a win-win solution for ecosystem services in sub-Saharan Africa. A meta-analysis	Agricultural landscapes are increasingly being managed with the aim of enhancing the provisioning of multiple ecosystem services and sustainability of production systems. However, agricultural management that maximizes provisioning ecosystem services can often reduce both regulating and maintenance services. We hypothesized that agroforestry reduces trade-offs between provisioning and regulating/…	Not including temperate data		Andrea	Y
fourth search		10.1016/j.scitotenv.2024.169882	Manson, S; Nekaris, KAI; Nijman, V; Campera, M	2024	Effect of shade on biodiversity within coffee farms: A meta-analysis	Aligning crop production with conservation initiatives has long been a topic of debate, with agricultural intensification threatening biodiversity across the globe. Shade-grown coffee allows farmers to preserve biodiversity by providing viable habitat, but its conservation value remains unclear. In this meta-analysis, we screened existing literature using the PRISMA protocol to compare the effect…	Not including temperate data	Camille	Camille	Y
Second search		10.1016/j.agee.2022.108024	Mokondoko, P; Avila-Foucat, VS; Galeana-Pizana, M	2022	Biophysical drivers of yield gaps and ecosystem services across different coffee-based agroforestry management types: A global meta-analysis	The productivity of agroforestry systems (AFSs) and the provisioning of associated ecosystem services (ESs) are threatened by increasing cropping intensification and climate change. Compared to full-sun coffee, maintaining shade cover might protect against climate variability, forest degradation, and pests/diseases attack. However, there may be trade-offs between yields and ESs. While the impacts…	Not including temperate data	Andrea	Camille	Y
First search	Kothke	10.1016/j.agee.2020.106899	Muchane M.N., Sileshi G.W., Gripenberg S., Jonsson M., Pumariño L., Barrios E.,	2020	Agroforestry boosts soil health in the humid and sub-humid tropics: A meta-analysis,	Agroforestry has been increasingly recognized as a key example of agroecological praxis contributing to the sustainable intensification of food production while providing a number of additional benefits to society. However, a quantitative synthesis of the impact of agroforestry on soil health and associated ecosystem services in the humid and sub-humid tropics is still lacking. The objective of t…	Not including temperate data		Andrea	Y
Second search	Kothke	10.1088/1748-9326/abb053	Niether, W; Jacobi, J; Blaser, WJ; Andres, C; Armengot, L	2020	Cocoa agroforestry systems versus monocultures: a multi-dimensional meta-analysis	Scientific knowledge, societal debates, and industry commitments around sustainable cocoa are increasing. Cocoa agroforestry systems are supposed to improve the sustainability of cocoa production. However, their combined agronomic, ecological, and socio-economic performance compared to monocultures is still largely unknown. Here we present a meta-analysis of 52 articles that directly compared coc…	Not including temperate data	Camille	Camille	Y
First search	Kothke	10.1007/s40725-016-0032-1	Norgrove, L; Beck, J	2016	Biodiversity Function and Resilience in Tropical Agroforestry Systems Including Shifting Cultivation	Agroforestry systems potentially deliver win-win solutions to production and biodiversity conservation in the tropics,but they need to be adapted to farmers' needs. We reviewed the literature on functional roles of biodiversity and resilience in tropical agroforestry systems,and we evaluated the evidence base for the beneficial role of biodiversity on yield,and effects of farmer management practi…	Not including temperate data AND NO QUANTITATIVE DATA		Andrea	Y
Third search		10.36783/18069657rbcs20220055	Oliveira, DMD; Tavares, RLM; Loss, A; Madari, BE; Cerri, CEP; Alves, BJR; Pereira, MG; Cherubin, MR	2023	Climate-smart agriculture and soil C sequestration in Brazilian Cerrado: a systematic review	Climate-smart agriculture (CSA) practices, mainly no-tillage (NT), cover cropping (CC), soil fertilization with organic amendments (OA), and crop-livestock (CL) and crop-livestock-forestry (CLF) systems, has been widely adopted in areas from Brazilian Cerrado. The CSA may partly offset former soil C losses and contribute to climate change mitigation. However, contradictory findings brought uncert…	Not including temperate data	Camille	Camille	Y
Second search	Kothke	10.1007/s13593-020-00642-3	Piato, K; Lefort, F; Subia, C; Caicedo, C; Calderon, D; Pico, J; Norgrove, L	2020	Effects of shade trees on robusta coffee growth, yield and quality. A meta-analysis	Productivity of coffee plantations is threatened by both climate change and decreasing revenues of coffee growers. Using shade trees might protect against temperature variability, erosion and excessive radiation but there may be trade-offs in productivity and quality. While impacts of shade trees on arabica (Coffea arabica) have been reviewed, a global synthesis on robusta (Coffea canephora) coff…	Not including temperate data AND NO QUANTITATIVE DATA	Camille	Camille	Y
Third search	Kothke	10.1111/ejss.13413	Ren, XH; Zou, WJ; Jiao, JY; Stewart, R; Jian, JS	2023	Soil properties affect crop yield changes under conservation agriculture: A systematic analysis	Conservation agriculture (CA) has the potential to sustain soil productivity and benefit agroecosystems, yet it is not fully understood how yield responses of different cropping systems are affected by inherent soil characteristics, for example, texture and dynamic soil properties, such as aggregation, nutrients and erosion. In this study, we conducted a systematic review to compare crop yield fr…	Not including temperate data	Camille	Camille	Y
Second search		10.1016/j.fcr.2022.108504	Rodenburg, J; Mollee, E; Coe, R; Sinclair, F	2022	Global analysis of yield benefits and risks from integrating trees with rice and implications for agroforestry research in Africa	While agroforestry is a well-established approach for agroecological intensification, rice is less often integrated with trees than other annual staple crops. The benefits and risks from rice agroforestry practices have not been systematically explored. Considering the need for strategies that may address low fertility and high degradation of arable soils and contribute to smallholder farm produc…	Not including temperate data	Andrea	Camille	Y
First search	Kothke	10.1016/j.foreco.2018.10.064	Santos, PZF; Crouzeilles, R; Sansevero, JBB	2019	Can agroforestry systems enhance biodiversity and ecosystem service provision in agricultural landscapes? A meta-analysis for the Brazilian Atlantic Forest	Human land use has extensively degraded ecosystems, leading to biodiversity losses and reducing the provision of ecosystem services (ES). Agroforestry systems have been recommended as a cost-effective strategy that integrates production and biodiversity conservation, yet few studies have quantified the capacity of agroforestry systems to conserve biodiversity and ES provision. Here we quantify th…	Not including temperate data		Andrea	Y
Kothke	Kothke	10.1007/s11104-008-9547-y	Sileshi, Gudeta; Akinnifesi, Festus K.; Ajayi, Oluyede Clifford; Place, Frank	2008	Meta-analysis of maize yield response to woody and herbaceous legumes in sub-Saharan Africa.	A number of studies have tested the effect of woody and herbaceous legumes on soil fertility and maize yields in sub-Saharan Africa. However, their effects on maize productivity are much debated because results have been variable. A meta-analysis was conducted with the aim of evaluating the evidence in support of yield benefits from woody and herbaceous green manure legumes. A total of 94 peer-re…	Not including temperate data	Margret	Camille	Y
First search		10.1016/j.jaridenv.2016.03.002	Sileshi, GW	2016	The magnitude and spatial extent of influence of Faidherbia albida trees on soil properties and primary productivity in drylands	Faidherbia (Faidherbia albida) is being promoted widely in interventions for combating desertification, regreening of the Sahel and agroforestry projects in dry lands. Some scientists have questioned the wisdom of its wider promotion without clear evidence of its impacts. This review provides novel analyses of the magnitude and spatial extent of its influence on soil properties and primary produc…	Not including temperate data		Andrea	Y
fourth search		10.1007/s13412-024-00917-1	Tyagi, A; Haritash, AK	2024	Climate-smart agriculture, enhanced agroproduction, and carbon sequestration potential of agroecosystems in India: a meta-analysis	Changing climate and shifts in weather patterns have significantly affected food production systems, which is evident in the form of crop damage, reduced yield, and market instability. Water- and chemical-intensive agriculture practices have made the sector a major contributor of carbon emissions, affecting the global climate, nutrient cycling, food security, etc. The adoption of climate-smart ag…	Not including temperate data	Camille	Camille	Y
First search	Kothke	10.1890/06-1976.1	Van Bael, SA; Philpott, SM; Greenberg, R; Bichier, P; Barber, NA; Mooney, KA; Gruner, DS	2008	Birds as predators in tropical agroforestry systems	Insectivorous birds reduce arthropod abundances and their damage to plants in some, but not all, studies where predation by birds has been assessed. The variation in bird effects may be due to characteristics such as plant productivity or quality, habitat complexity, and/or species diversity of predator and prey assemblages. Since agroforestry systems vary in such characteristics, these systems p…	Not including temperate data	Andrea	Camille	Y
fourth search		10.1016/j.jclepro.2024.142782		2024	Greenhouse gas fluxes in brazilian climate-smart agricultural and livestock systems: A systematic and critical overview		Not including temperate data	Camille	Camille	Y
Third search		10.1038/s41467-023-39338-z	Beillouin D.; Corbeels M.; Demenois J.; Berre D.; Boyer A.; Fallot A.; Feder F.; Cardinael R.	2023	A global meta-analysis of soil organic carbon in the Anthropocene	Anthropogenic activities profoundly impact soil organic carbon (SOC), affecting its contribution to ecosystem services such as climate regulation. Here, we conducted a thorough review of the impacts of land-use change, land management, and climate change on SOC. Using second-order meta-analysis, we synthesized findings from 230 first-order meta-analyses comprising over 25,000 primary studies. We …	The paper is neither a systematic review nor a meta-analysis of primary research.	Camille	Andrea	O
Third search		10.3390/su142416564	Daugaviete, M; Makovskis, K; Lazdins, A; Lazdina, D	2022	Suitability of Fast-Growing Tree Species (Salix spp., Populus spp., Alnus spp.) for the Establishment of Economic Agroforestry Zones for Biomass Energy in the Baltic Sea Region	The main goal of this review was to provide an assessment of the potential of fast-growing tree species for the suitable transformation of agroforestry areas for biomass production in the Baltic Sea region. Our interest was to highlight the research on the management process of agroforestry zones by establishing short rotation plantations with the tree species Salix spp., Populus spp. and Alnus s…	The paper is neither a systematic review nor a meta-analysis of primary research.	Camille	Andrea	O
Second search		10.1002/ecy.3415	Kou-Giesbrecht, S; Menge, DNL	2021	Nitrogen-fixing trees increase soil nitrous oxide emissions: a meta-analysis	Nitrogen-fixing trees are an important nitrogen source to terrestrial ecosystems. While they can fuel primary production and drive carbon dioxide sequestration, they can also potentially stimulate soil emissions of nitrous oxide, a potent greenhouse gas. However, studies on the influence of nitrogen-fixing trees on soil nitrous oxide emissions have not been quantitatively synthesized. Here, we sh…	The study does not deal with agroforestry systems, according to its definition.	Camille	Camille	O
Second search		10.1007/s13593-022-00783-7	Laub, M; Pataczek, L; Feuerbacher, A; Zikeli, S; Hogy, P	2022	Contrasting yield responses at varying levels of shade suggest different suitability of crops for dual land-use systems: a meta-analysis	Despite the large body of research surrounding crop growth parameters, there is still a lack of systematic assessments on how harvestable yields of different crop types respond to varying levels of shading. However, with the advent of agrivoltaic systems, a technology that combines energy and food production, shade tolerance of cropping systems is becoming increasingly important. To address this …	The study does not deal with agroforestry systems, according to its definition.	Andrea		O
Second search	Kothke-Castle	10.1016/j.agsy.2019.102736	Morugan-Coronado, A; Linares, C; Gomez-Lopez, MD; Faz, A; Zornoza, R	2020	The impact of intercropping, tillage and fertilizer type on soil and crop yield in fruit orchards under Mediterranean conditions: A meta-analysis of field studies	A meta-analysis specially based on tree crops was conducted to evaluate the changes in soil organic carbon (SOC), soil N and P, and crop yield in a Mediterranean climate, which are affected by: (i) management practices (crop diversification, tillage, fertilization); (ii) environmental characteristics, such as soil clay and climatic variables; and (iii) study length. The aim of this study was to a…	The study does not deal with agroforestry systems, according to its definition.	Camille	Camille	O
Kothke	Kothke	10.1016/j.agee.2016.10.024	Vicente-Vicente, J.L.; García-Ruiz, R.; Francaviglia, R.; Aguilera, E.; Smith, P.	2016	Soil carbon sequestration rates under Mediterranean woody crops using recommended management practices: A meta-analysis.	Reforestation has a great potential on soil carbon sequestration resulting from continuous deposition of plant residues above- and belowground. The purpose of this study was to answer the following questions: (1) did reforestation with 35 years old rubber tree plantation and 3 and 5 years old eucalyptus plantations enhance SOC accumulation up to 1 m depth? (2) How much did the conversion of fores…	The study does not deal with agroforestry systems, according to its definition.	Margret	Camille	O
Second search	kothke	10.1016/j.scitotenv.2019.135345	England, JR; O'Grady, AP; Fleming, A; Marais, Z; Mendham, D	2020	Trees on farms to support natural capital: An evidence-based review for grazed dairy systems	Intensification of the dairy industry globally, combined with a changing climate, has placed increased pressure on natural capital assets (and the flow of ecosystem services) on farms. Agroforestry is widely promoted as an intervention to address these issues. While some benefits of integrating trees on farms, such as carbon sequestration and biodiversity, are reasonably well known, less is known…	The systematic review is not presenting quantitative data (either with or without full statistical analysis)	Camille	Camille	O	Andrea
Second search		10.1051/agro/2009058	Akinnifesi, FK; Ajayi, OC; Sileshi, G; Chirwa, PW; Chianu, J	2010	Fertiliser trees for sustainable food security in the maize-based production systems of East and Southern Africa. A review	The negative effects of soil fertility depletion on food security, especially among smallholder farmers in Africa, is of economic importance, and may be worsened by climate change and rising global fertiliser prices. Substantial efforts and investment have gone into development of alternative soil fertility management options. These include vigorous research and development of N-fixing plants or …	The paper is neither a systematic review nor a meta-analysis of primary research.	Camille	Camille	O
First search		10.1007/978-94-007-0394-0_9	Akinnifesi, FK; Ajayi, OC; Sileshi, G; Chirwa, PW; Chianu, J	2011	Fertiliser Trees for Sustainable Food Security in the Maize-Based Production Systems of East and Southern Africa	The negative effects of soil fertility depletion on food security, especially among smallholder farmers in Africa, is of economic importance, and may be worsened by climate change and rising global fertiliser prices. Substantial efforts and investment have gone into development of alternative soil fertility management options. These include vigorous research and development of N-fixing plants or …	The paper is neither a systematic review nor a meta-analysis of primary research.		Marta	O
fourth search		10.1038/s41598-023-45960-0	Amorim, HCS; Ashworth, AJ; O'Brien, PL; Thomas, AL; Runkle, BRK; Philipp, D	2023	Temperate silvopastures provide greater ecosystem services than conventional pasture systems	Management and design affect systems' ability to deliver ecosystem services and meet sustainable intensification needs for a growing population. Soil-plant-animal health evaluations at the systems level for conventional and silvopastoral environments are lacking and challenge adoption across temperate regions. Impacts of silvopasture on soil quality, microclimate, cattle heat stress, forage quali…	The paper is neither a systematic review nor a meta-analysis of primary research.	Camille	Camille	O
Third search		10.1111/gcbb.12934	An, ZF; Bork, EW; Duan, XY; Gross, CD; Carlyle, CN; Chang, SX	2022	Quantifying past, current, and future forest carbon stocks within agroforestry systems in central Alberta, Canada	Information about regional-level carbon (C) stocks in agroforestry systems (AFS), as well as the annual loss of agroforests and associated C stocks, is scarce, limiting our capacity for increasing C sequestration through establishing, retaining, and enhancing these systems. This study quantified regional-level C stocks and the associated incremental economic value in the forest land-use component…	The paper is neither a systematic review nor a meta-analysis of primary research.	Camille	Camille	O
First search		10.1016/j.biocon.2010.01.013	Anand, MO; Krishnaswamy, J; Kumar, A; Bali, A	2010	Sustaining biodiversity conservation in human-modified landscapes in the Western Ghats: Remnant forests matter	Human-modified tropical landscapes under semi-natural or agro-ecosystems often harbor biodiversity of significant conservation value. In the Western Ghats of India, these ecosystems also provide connectivity between protected areas and other remnant forests. We investigated the conservation value of these landscapes and agro-ecosystems using results from 35 studies covering 14 taxonomic groups. L…	The topic of the meta-analysis is out of the scope of this review.		Marta	O
First search	Kothke	10.1016/j.cropro.2017.03.010	Andres, C; Gattinger, A; Dzahini-Obiatey, HK; Blaser, WJ; Offei, SK; Six, J	2017	Combatting Cocoa Swollen Shoot Virus Disease: What do we know?	Cocoa Swollen Shoot Virus Disease (CSSVD) is one of the major factors limiting cocoa (Theobroma cacao L.) productivity in West Africa. The only cure for CSSVD is to cut out visibly infected trees and the official eradication campaign in Ghana has cut out more than 200 million trees since 1946. 80 years of research on preventive control measures have mainly focused on resistance breeding, mild str…	The topic of the meta-analysis is out of the scope of this review.	Andrea	Andrea	O
Second search		10.1016/j.crsust.2020.100015	Anuga, SW; Chirinda, N; Nukpezah, D; Ahenkan, A; Andrieu, N; Gordon, C	2020	Towards low carbon agriculture: Systematic-narratives of climate-smart agriculture mitigation potential in Africa	The agricultural sector is the second major source of climate change globally, contributing to anthropogenic Green-house Gas (GHG) emissions. In low-to-middle income countries, estimations indicate future increases in agricultural emissions. Climate-Smart Agriculture (CSA) has an express opportunity to transform agriculture across the globe. In Africa, CSA targets focused on resilience building a…	The analysis is not based on pairwise comparisons	Camille	Camille	O
First search		10.2136/sssaj2017.03.0077	Basche, A; DeLonge, M	2017	The Impact of Continuous Living Cover on Soil Hydrologic Properties: A Meta-Analysis	Increased rainfall variability due to climate change threatens the efficacy of critical soil ecosystem services. One strategy to negate effects of too much or not enough rainfall is to improve soil water properties. Practices that offer "continuous living cover" can enhance soil water storage and other soil hydrologic properties relative to annual crop systems, but to what extent such benefits ca…	The systematic review is not presenting quantitative data (either with or without full statistical analysis)	Andrea	Andrea	O
Castle	Castle	10.1111/cobi.12536	Batary P, Dicks LV, Kleijn D, and Sutherland WJ. (2015). The role of agri-environment schemes in conservation and environmental management. Conservation Biology, 29(4), pp.1006-1016.	2015	The role of agri-environment schemes in conservation and environmental management		The study does not deal with agroforestry systems, according to its definition.	Camille	Camille	o
Second search		10.1111/gcb.15747	Beillouin, D; Ben-Ari, T; Malezieux, E; Seufert, V; Makowski, D	2021	Positive but variable effects of crop diversification on biodiversity and ecosystem services	Ecological theory suggests that biodiversity has a positive and stabilizing effect on the delivery of ecosystem services. Yet, the impacts of increasing the diversity of cultivated crop species or varieties in agroecosystems are still under scrutiny. The available empirical evidence is scattered in scope, agronomic and geographic contexts, and impacts on ecosystem services may depend on the type …	The paper is neither a systematic review nor a meta-analysis of primary research.	Camille	Camille	O
Second search		10.1016/j.eja.2013.04.007	Bell, LW; Moore, AD; Kirkegaard, JA	2014	Evolution in crop-livestock integration systems that improve farm productivity and environmental performance in Australia	Australian farming systems have an enduring history of crop-livestock integration which emerged in the face of high climate variability, infertile soils and variable landscapes. Ley farming systems with phases of shorter annual legume pasture phases with cereal crops predominate but, emerging sustainability issues and the need to manage risk is driving ongoing innovation in crop-livestock integra…	The paper is neither a systematic review nor a meta-analysis of primary research.	Camille	Andrea	O
Castle		10.3390/f10110981	Bentrup, G., Hopwood, J., Adamson, N.L. and Vaughan, M.	2019	Temperate Agroforestry Systems and Insect Pollinators: A Review		The systematic review is not presenting quantitative data (either with or without full statistical analysis)	Camille	Camille	o
Castle		10.1186/s13750-015-0050-7	Bernes C ; Jonsson B G; Junninen K ; Lõhmus A ; Macdonald E ; Müller J ; Sandström J ;	2015	What is the impact of active management on biodiversity in boreal and temperate forests set aside for conservation or restoration? A systematic map		The systematic review is not presenting quantitative data (either with or without full statistical analysis)	Camille	Camille	o
Castle		10.1186/s13750-018-0125-3	Bernes C ; Macura B ; Jonsson B G; Junninen K ; Müller J ; Sandström J ; Lõhmus A ; Macdonald E ;	2018	Manipulating ungulate herbivory in temperate and boreal forests: Effects on vegetation and invertebrates. A systematic review		The systematic review is not presenting quantitative data (either with or without full statistical analysis)	Camille	Camille	o
First search	Kothke	10.1002/ldr.3478	Bohada-Murillo, M; Castano-Villa, GJ; Fonturbel, FE	2019	The effects of forestry and agroforestry plantations on bird diversity: A global synthesis	The increasing expansion of productive lands around the world during the last decades constitutes a strong driver of biodiversity loss, as they are usually established near to high diversity areas. Despite many studies that have compared bird diversity between natural and productive systems, a global synthesis is still missing and important for understanding how biodiversity is being altered. We …	The comparator is only natural forests		Marta	O
Third search		10.1080/21683565.2023.2225438	Bracken, P; Burgess, PJ; Girkin, NT	2023	Opportunities for enhancing the climate resilience of coffee production through improved crop, soil and water management	Climate change is adversely affecting coffee production, impacting both yields and quality. Coffee production is dominated by the cultivation of Arabica and Robusta coffee, species that represent 99% of production, but both will be affected by climate change. Sustainable management practices that can enhance the resilience of production and livelihoods to climate change are urgently needed as pro…	The systematic review is not presenting quantitative data (either with or without full statistical analysis)	Camille	Camille	O
Kothke	Kothke	10.1007/s13593-013-0133-1	Branca, G.; Lipper, L.; McCarthy, N.; Jolejole, M. C.	2013	Food security, climate change, and sustainable land management. A review.	Agriculture production in developing countries must be increased to meet food demand for a growing population. Earlier literature suggests that sustainable land management could increase food production without degrading soil and water resources. Improved agronomic practices include organic fertilization, minimum soil disturbance, and incorporation of residues, terraces, water harvesting and cons…	The analysis is not based on pairwise comparisons	Margret	Margret	O
Second search		10.1186/s13750-018-0136-0	Brown, SE; Miller, DC; Ordonez, PJ; Baylis, K	2018	Evidence for the impacts of agroforestry on agricultural productivity, ecosystem services, and human well-being in high-income countries: a systematic map protocol	BackgroundAgroforestry bridges the gap that often separates agriculture and forestry by building integrated systems that address both environmental and socio-economic objectives. Agroforestry can improve the resiliency of agricultural systems and mitigate the impacts of climate change. Existing research suggests that integrating trees on farms can prevent environmental degradation, improve agricu…	The paper is neither a systematic review nor a meta-analysis of primary research.	Camille	Camille	O
other source		10.1007/s00374-018-1332-3	Cardinael, R., Hoeffner, K., Chenu, C. et al.	2019	Spatial variation of earthworm communities and soil organic carbon in temperate agroforestry	The aim of this study was to assess how soil organic C (SOC) stocks and earthworm communities were modified in agroforestry systems compared to treeless control plots and within the agroforestry plots (tree rows vs alleys). We used a network of 13 silvoarable agroforestry sites in France along a north/south gradient. Total earthworm abundance and biomass were significantly higher in the tree rows…	The paper is neither a systematic review nor a meta-analysis of primary research.	Camille	Camille	O
Third search		10.1007/s10457-022-00754-7	Cardozo, EG; Celentano, D; Rousseau, GX; Silva, HRE; Muchavisoy, HM; Gehring, C	2022	Agroforestry systems recover tree carbon stock faster than natural succession in Eastern Amazon, Brazil	The potential of agroforestry systems (AFS) for atmospheric carbon sequestration in degraded tropical lands is of key interest for climate change and rural development policies. This study evaluated aboveground and soil (0-20 cm) carbon stocks of AFS, secondary forests (SF), conserved and logged mature forests, on 88 sites in the eastern Brazilian Amazon. Tree carbon stock was higher in young (< …	The paper is neither a systematic review nor a meta-analysis of primary research.	Camille	Camille	O
Second search		10.1186/s13750-022-00260-4	Castle, SE; Miller, DC; Merten, N; Ordonez, PJ; Baylis, K	2022	Evidence for the impacts of agroforestry on ecosystem services and human well-being in high-income countries: a systematic map	Background: Agroforestry bridges the gap that often separates agriculture and forestry by building integrated systems to address both environmental and socio-economic objectives. Existing empirical research has suggested that agroforestry-the integration of trees with crops and/or livestock-can prevent environmental degradation, improve agricultural productivity, increase carbon sequestration, an…	The systematic review is not presenting quantitative data (either with or without full statistical analysis)	Camille	Andrea	O
First search	Kothke	10.1038/srep23954	Chaudhary, A; Burivalova, Z; Koh, LP; Hellweg, S	2016	Impact of Forest Management on Species Richness: Global Meta-Analysis and Economic Trade-Offs	Forests managed for timber have an important role to play in conserving global biodiversity. We evaluated the most common timber production systems worldwide in terms of their impact on local species richness by conducting a categorical meta-analysis. We reviewed 287 published studies containing 1008 comparisons of species richness in managed and unmanaged forests and derived management, taxon, a…	The comparator is only natural forests		David	O
Second search		10.3390/su131910744	Chebli, Y; El Otmani, S; Elame, F; Moula, N; Chentouf, M; Hornick, JL; Cabaraux, JF	2021	Silvopastoral System in Morocco: Focus on Their Importance, Strategic Functions, and Recent Changes in the Mediterranean Side	In the Mediterranean basin, the silvopastoral system has always been part of the regional economy. Silvopastoral areas contribute significantly to the development of the ecological and socio-economic factors of territorial sustainability. However, little attention has been paid to reviewing the importance, historical evolution, socio-economic conditions, and climate change impact of the southern …	The systematic review is not presenting quantitative data (either with or without full statistical analysis)	Camille	Camille	O
Castle		10.1186/s13750-019-0148-4	Cheng, SH; MacLeod, K; Ahlroth, S; Onder, S; Perge, E; Shyamsundar, P; Rana, P; Garside, R; Kristjanson, P; McKinnon, MC; Miller, DC	2019	A systematic map of evidence on the contribution of forests to poverty alleviation		The systematic review is not presenting quantitative data (either with or without full statistical analysis)	Camille	Camille	o
Third search		10.1016/j.jaridenv.2023.105053	Chérif A.A.; Houndonougbo J.S.H.; Idohou R.; Mensah S.; Azihou A.F.; Avocèvou-Ayisso C.; Assogbadjo A.E.; Sinsin B.	2023	Towards sustainable conservation and domestication of Balanites aegyptiaca L. (Zygophyllaceae) in Africa: progress and challenges	Balanites aegyptiaca is a key agroforestry tree species widely distributed across the African drylands, and with a high socioeconomic potential for rural communities. Previous research studies have revealed the importance of this multipurpose fruit tree species from an ecological perspective, however, there is still little documentation of the current state of knowledge and research perspectives …	The topic of the meta-analysis is out of the scope of this review.	Camille	Camille	O
fourth search		10.1016/j.agsy.2023.103807	Datta, P; Behera, B; Rahut, DB	2024	Assessing the role of agriculture-forestry-livestock nexus in improving farmers' food security in South Asia: A systematic literature review	CONTEXT: There is a growing consensus that agriculture, forestry, and livestock integration (agroforestry systems) could assist South Asia in combating food insecurity by expediting the transition towards sustainability. However, there is a dearth of a comprehensive synthesis of evidence demonstrating the actual relevance of this nexus to agroecological development and farmers' food security in S…	The systematic review is not presenting quantitative data (either with or without full statistical analysis)	Camille	Camille	O
Castle	Castle	10.1007/s10980-006-9064-4	Davies ZG ; Pullin AS ;	2007	Are hedgerows effective corridors between fragments of woodland habitat? An evidence-based approach		The systematic review is not presenting quantitative data (either with or without full statistical analysis)	Camille	Camille	O
Castle		www.environmentalevidence.org/SR8a.html.	Davies, Z.G. & Pullin, A.S.	2006	Do habitat corridors increase population viability? Part A: Do hedgerow corridors increase the population viability of woodland species?		The systematic review is not presenting quantitative data (either with or without full statistical analysis)	Andrea		O
Second search		10.21664/2238-8869.2021V10I3.P114-123	De Souza C.C.F.; dos Santos M.A.S.; Rebello F.K.; Martins C.M.; Lopes M.L.B.; do Socorro Aleixo Barbosa A.; dos Santos Saraiva J.	2021	Agroecology in the Brazilian Amazon. A Review	Agroecological practices are alternatives for valuing and conserving the biodiversity of the Amazon as well as for integrating family farmers who survive from the exploitation of natural resources in the face of the expansion of large agricultural projects that have advanced in the region. In this respect, the objective of this study was to evaluate the scientific production related to agroecolog…	The topic of the meta-analysis is out of the scope of this review.	Camille	Camille	O
Second search		10.1007/s00484-023-02431-5	Deniz, M; De-Sousa, KT; Vieira, FMC; do Vale, MM; Dittrich, JR; Daros, RR; Hotzel, MJ		A systematic review of the effects of silvopastoral system on thermal environment and dairy cows' behavioral and physiological responses	Agroforestry has potential for strengthening the climate change resilience of smallholder farmers in Southeast Asia. In Indonesia, the food security challenges faced by smallholders will likely worsen due to climate change impacts. Agroforestry provides and option for strengthening climate change resilience, while contributing to food access, income, health, and environmental stability. To evalua…	The systematic review is not presenting quantitative data (either with or without full statistical analysis)	Andrea	Camille	O
fourth search		10.1016/j.forpol.2023.103136	Dmuchowski, W; Baczewska-Dabrowska, AH; Gworek, B	2024	The role of temperate agroforestry in mitigating climate change: A review	Climate change is one of the greatest threats to civilization and makes it necessary to intensify efforts to reduce greenhouse gas emissions and their concentration in the air. In this situation, the role of agriculture as a source of greenhouse gas emissions and the potential for carbon sequestration in the soil is particularly important. Conventional agriculture cannot contribute to climate cha…	The systematic review is not presenting quantitative data (either with or without full statistical analysis)	Camille	Camille	O
Kothke	Kothke	10.1007/s13280-016-0836-z	Dressler, W. H.; Wilson, D.; Clendenning, J.; Cramb, R.; Keenan, R.; Mahanty, S.; Bruun, T. B.; Mertz, O.; Lasco, R. D.	2017	The impact of swidden decline on livelihoods and ecosystem services in Southeast Asia: A review of the evidence from 1990 to 2015.	Global economic change and policy interventions are driving transitions from long-fallow swidden (LFS) systems to alternative land uses in Southeast Asia's uplands. This study presents a systematic review of how these transitions impact upon livelihoods and ecosystem services in the region. Over 17 000 studies published between 1950 and 2015 were narrowed, based on relevance and quality, to 93 st…	The study does not deal with agroforestry systems, according to its definition.	Margret	Camille	O
Second search		10.1007/s10457-021-00632-8	Duffy, C; Toth, GG; Hagan, RPO; McKeown, PC; Rahman, SA; Widyaningsih, Y; Sunderland, TCH; Spillane, C	2021	Agroforestry contributions to smallholder farmer food security in Indonesia	This paper compares financial and biodiversity performance of small-scale shaded coffee and cocoa plantations versus intensified conventional ones. We conduct a meta-analysis including 23 studies on coffee and cocoa plantations over a 26 year period. Our results show that, contrary to common perceptions, profitability and cost-efficiency are higher for small-scale shaded systems. Despite the lowe…	The systematic review is not presenting quantitative data (either with or without full statistical analysis)	Camille	Camille	O
Second search		10.1038/s43016-022-00657-x	Elrys, AS; Uwiragiye, Y; Zhang, YH; Abdel-Fattah, MK; Chen, ZX; Zhang, HM; Meng, L; Wang, J; Zhu, TB; Cheng, Y; Zhang, JB; Cai, ZC; Chang, SX; Muller, C	2023	Expanding agroforestry can increase nitrate retention and mitigate the global impact of a leaky nitrogen cycle in croplands	The internal soil nitrogen (N) cycle supplies N to plants and microorganisms but may induce N pollution in the environment. Understanding the variability of gross N cycling rates resulting from the global spatial heterogeneity of climatic and edaphic variables is essential for estimating the potential risk of N loss. Here we compiled 4,032 observations from 398 published N-15 pool dilution and tr…	The paper is neither a systematic review nor a meta-analysis of primary research.	Andrea	Camille	O
Second search		10.5194/nhess-23-481-2023	Enu, KB; Zingraff-Hamed, A; Rahman, MA; Stringer, LC; Pauleit, S	2023	Review article: Potential of nature-based solutions to mitigatehydro-meteorological risks in sub-Saharan Africa	Sub-Saharan Africa (SSA) is the region most vulnerable to climate change and related hydro-meteorological risks. These risks are exacerbated in rapidly expanding urban areas due to the loss and degradation of green and blue spaces with their regulating ecosystem services. The potential of nature-based solutions (NBSs) to mitigate hydro-meteorological risks such as floods is increasingly recognise…	The topic of the meta-analysis is out of the scope of this review.	Andrea	Camille	O
Third search		10.1038/s41598-023-35578-7	Esquivel, MJ; Vilchez-Mendoza, S; Harvey, CA; Ospina, MA; Somarriba, E; Deheuvels, O; Virginio, ED; Haggar, J; Detlefsen, G; Cerdan, C; Casanoves, F; Ordoñez, JC	2023	Patterns of shade plant diversity in four agroforestry systems across Central America: a meta-analysis	Agroforestry systems can potentially increase tree diversity within agricultural landscapes, but to date, there is little understanding of the patterns of shade plant diversity within different agroforestry systems (AFS) at large spatial scales. Using compiled plant inventory data (from 23 sources, 2517 plots, and 148,255 individuals) encompassing four AFS (shaded coffee; shaded cocoa; dispersed …	The topic of the meta-analysis is out of the scope of this review.	Camille	Andrea	O
Castle		10.1016/j.ecolind.2015.11.016	Fagerholm N ; Torralba M ; Burgess PJ ; Plieninger T ;	2016	A systematic map of ecosystem services assessments around European agroforestry		The systematic review is not presenting quantitative data (either with or without full statistical analysis)	Camille	Camille	o
Castle	Castle	10.1016/j.watres.2018.04.014	Feld CK, Fernandes MR, Ferreira MT, Hering D, Ormerod SJ, Venohr M, and Gutierrez-Canovas C. (2018). Evaluating riparian solutions to multiple stressor problems in river ecosystems - A conceptual study. Water Research, 139, pp.381-394.	2018	Evaluating riparian solutions to multiple stressor problems in river ecosystems - A conceptual study		The systematic review is not presenting quantitative data (either with or without full statistical analysis)	Camille	Camille	o
Castle		10.1016/j.rser.2017.01.052	Ferrarini A ; Serra P ; Almagro M ; Trevisan M ; Amaducci S ;	2017	Multiple ecosystem services provision and biomass logistics management in bioenergy buffers: A state-of-the-art review		The systematic review is not presenting quantitative data (either with or without full statistical analysis)	Camille	Camille	o
Castle		10.1111/mam.12137	Ferreira, AS; Peres, CA; Bogoni, JA; Cassano, CR	2018	Use of agroecosystem matrix habitats by mammalian carnivores (Carnivora): a global-scale analysis		The systematic review is not presenting quantitative data (either with or without full statistical analysis)	Camille	Camille	o
Second search		10.1051/e3sconf/202130604015	Fitriani F.; Kuswadi D.	2021	Driving factors of sustainable production in upland watersheds: systematic literature review	Sustainable production in upland watersheds is a formidable challenge for farmers. The trade-off laid between economic benefits (productivity) and sustainability. Farmers’ resilience in the upstream watershed needs to meet sustainable agricultural production. This paper was conducted to review the local driving factors which are supporting economic resilience and climate change mitigation to sust…	The topic of the meta-analysis is out of the scope of this review.	Camille	Camille	O
Castle		10.1186/2047-2382-3-15	Foli S ; Reed J ; Clendenning J ; Petrokofsky G ; Padoch C ; Sunderland T ;	2014	To what extent does the presence of forests and trees contribute to food production in humid and dry forest landscapes?: a systematic review protocol		The systematic review is not presenting quantitative data (either with or without full statistical analysis)	Camille	Camille	o
Kothke	Kothke	10.1038/nature10425	Gibson, Luke; Lee, Tien Ming; Koh, Lian Pin; Brook, Barry W.; Gardner, Toby A.; Barlow, Jos; Peres, Carlos A.; Bradshaw, Corey J. A.; Laurance, William F.; Lovejoy, Thomas E.; Sodhi, Navjot S.	2011	Primary forests are irreplaceable for sustaining tropical biodiversity.	Human-driven land-use changes increasingly threaten biodiversity, particularly in tropical forests where both species diversity and human pressures on natural environments are high1 . The rapid conversion of tropical forests for agriculture, timber production and other uses has generated vast, human-dominated landscapes with potentially dire consequences for tropical biodiversity2–5 . Today, few …	The comparator is only natural forests	Margret	Camille	O
Second search		10.3390/su132011397	Goncalves, CDQ; Schlindwein, MM; Martinelli, GD	2021	Agroforestry Systems: A Systematic Review Focusing on Traditional Indigenous Practices, Food and Nutrition Security, Economic Viability, and the Role of Women	This study aimed to identify from the literature review whether agroforestry systems have been an agricultural practice adopted by indigenous peoples for income generation and food and nutritional security. For this, a systematic review was conducted in the period from 2010 to 2020 of 92 articles, dissertations, and theses. Thus, it is found that agroforestry practices are traditional indigenous …	The systematic review is not presenting quantitative data (either with or without full statistical analysis)	Camille	Andrea	O
Second search		10.1111/gcb.15342	Guenet, B; Gabrielle, B; Chenu, C; Arrouays, D; Balesdent, JM; Bernoux, M; Bruni, E; Caliman, JP; Cardinael, R; Chen, SC; Ciais, P; Desbois, D; Fouche, J; Frank, S; Henault, C; Lugato, E; Naipal, V; Nesme, T; Obersteiner, M; Pellerin, S; Powlson, DS; Rasse, DP; Rees, F; Soussana, JF; Su, Y; Tian, HQ; Valin, H; Zhou, F	2021	Can N2O emissions offset the benefits from soil organic carbon storage?	To respect the Paris agreement targeting a limitation of global warming below 2 degrees C by 2100, and possibly below 1.5 degrees C, drastic reductions of greenhouse gas emissions are mandatory but not sufficient. Large-scale deployment of other climate mitigation strategies is also necessary. Among these, increasing soil organic carbon (SOC) stocks is an important lever because carbon in soils c…	The paper is neither a systematic review nor a meta-analysis of primary research.	Camille	Andrea	O
Castle		10.1186/s13750-018-0126-2	Haddaway N R; Brown C ; Eales J ; Eggers S ; Josefsson J ; Kronvang B ; Randall N P; Uusi-Kämppä J ;	2018	The multifunctional roles of vegetated strips around and within agricultural fields		The systematic review is not presenting quantitative data (either with or without full statistical analysis)	Camille	Camille	o
Third search		10.1016/j.envsci.2023.02.018	Haughey, E; Neogi, S; Portugal-Pereira, J; van Diemen, R; Slade, RB	2023	Sustainable intensification and carbon sequestration research in agricultural systems: A systematic review	Mitigation pathways that stabilise global warming to 1.5 degrees C describe rapidly increasing deployment of landbased solutions, including increased carbon sequestration in soils and biomass. This places additional demands on land, which is also required to provide food security and other ecosystem services. Sustainable Intensification (SI) of agriculture has the potential to facilitate meeting …	The systematic review is not presenting quantitative data (either with or without full statistical analysis)	Camille	Andrea	O
Kothke	Kothke	10.3390/insects10080247	Herz, A; Cahenzli, F; Penvern, S; Pfiffner, L; Tasin, M; Sigsgaard, L.	2019	Managing Floral Resources in Apple Orchards for Pest Control: Ideas, Experiences and Future Directions.	Functional biodiversity is of fundamental importance for pest control. Many natural enemies rely on floral resources to complete their life cycle. Farmers need to ensure the availability of suitable and sufficient floral biodiversity. This review summarizes 66 studies on the management of floral biodiversity in apple orchards, published since 1986. Approaches followed different degrees of interve…	The systematic review is not presenting quantitative data (either with or without full statistical analysis)	Margret	Margret	O
Castle		10.1007/s13593-017-0434-x	Holland JM ; Douma JC ; Crowley L ; James L ; Kor L ; Stevenson DRW ; Smith BM ;	2017	Semi-natural habitats support biological control, pollination and soil conservation in Europe. A review		The systematic review is not presenting quantitative data (either with or without full statistical analysis)	Camille	Camille	o
fourth search		10.1016/j.scitotenv.2023.167558	Jakovac, C; Korys, KA; Rodrigues, AF; Ronix, A; Tubenchlak, F; Monteiro, LM; Lemgruber, L; Santos, HS; Mendes, M; Junqueira, AB; Crouzeilles, R; Maioli, V; Latawiec, AE	2024	Meta-analysis of carbon stocks and biodiversity outcomes across Brazilian restored biomes	Ecosystem restoration strategies vary widely in the techniques applied and ecological contexts. We conducted a meta-analysis to evaluate how restoration success varies across socio-ecological contexts, taxonomic groups and biomes. Restoration success is quantified as the percentage of each ecological metric value attained in the restoration site compared to the reference systems. We show that res…	The topic of the meta-analysis is out of the scope of this review.	Camille	Camille	O
Third search		10.1016/j.agee.2021.107434	Jaman, MS; Muraina, TO; Dam, Q; Zhang, X; Jamil, M; Bhattarai, S; Islam, F	2021	Effects of single and mixed plant types on soil carbon and nitrogen dynamics in homestead agroforestry systems in Northern Bangladesh	The importance of plant types and diversity have been focused for studying aboveground nutrients dynamics in the agroforestry system; however, a substantial knowledge gap remains for the belowground nutrients. We tested the effects of plant types (shrub vs. tree vs. tree-shrub) and diversity indices on soil organic carbon (SOC) and soil nitrogen (SN) dynamics in 64 homesteads in northern Banglade…	The paper is neither a systematic review nor a meta-analysis of primary research.	Camille	Camille	O
Second search		10.3390/f11121321	Jordon, MW; Willis, KJ; Harvey, WJ; Petrokofsky, L; Petrokofsky, G	2020	Implications of Temperate Agroforestry on Sheep and Cattle Productivity, Environmental Impacts and Enterprise Economics. A Systematic Evidence Map	The environmental impacts of ruminant livestock farming need to be mitigated to improve the sustainability of food production. These negative impacts have been compounded by the increased spatial and cultural separation of farming and forestry across multiple temperate landscapes and contexts over recent centuries, and could at least in part be alleviated by re-integration of livestock and trees …	The systematic review is not presenting quantitative data (either with or without full statistical analysis)	Camille	Margret	O
Third search		10.1016/j.gfs.2021.100540	Kerr, RB; Madsen, S; Stüber, M; Liebert, J; Enloe, S; Borghino, N; Parros, P; Mutyambai, DM; Prudhon, M; Wezel, A	2021	Can agroecology improve food security and nutrition? A review	Agroecology increasingly has gained scientific and policy recognition as having potential to address environmental and social issues within food production, but concerns have been raised about its implications for food security and nutrition, particularly in low-income countries. This review paper examines recent evidence (1998-2019) for whether agroecological practices can improve human food sec…	The systematic review is not presenting quantitative data (either with or without full statistical analysis)	Camille	Camille	O
Third search		10.1016/j.agee.2023.108480	Kletty, F; Rozan, A; Habold, C	2023	Biodiversity in temperate silvoarable systems: A systematic review	Silvoarable systems (SAS) are agroforestry systems (AFS) that combine the cultivation of trees and arable crops. Often, rows of trees delineate crop alleys in a field (alley-cropping system). SAS have the potential to provide many agricultural and environmental benefits, are innovative in their modern form, and are becoming more widespread. These diversified farming systems have the potential to …	The systematic review is not presenting quantitative data (either with or without full statistical analysis)	Camille	Sonja	O
First search		10.3390/land7040158	Kongsager, R	2018	Linking Climate Change Adaptation and Mitigation: A Review with Evidence from the Land-Use Sectors	There is extensive scientific evidence that both adaptation and mitigation are essential to address the problem of climate change. However, there is still limited knowledge about the possibilities for exploiting the interrelationships between these measures in the design and implementation of climate change activities. In this paper, first the adaptation-mitigation dichotomy and definitions of ad…	The paper is neither a systematic review nor a meta-analysis of primary research.		Andrea	O
Second search		10.3389/fenvs.2022.925477	Kothke, M; Ahimbisibwe, V; Lippe, M	2022	The evidence base on the environmental, economic and social outcomes of agroforestry is patchy-An evidence review map	Agroforestry is often seen as a panacea that offers multiple environmental, economic, and social benefits. However, the validity of generalized statements on agroforestry outcomes is doubtful because the evidence base is unclear. Systematic reviews and meta-analyses exist on the topic in addition to many case studies that address specific outcomes of individual agroforestry practices at different…	The systematic review is not presenting quantitative data (either with or without full statistical analysis)	Camille	Margret	O
Second search		10.1007/s13593-022-00788-2	Koutouleas, A; Sarzynski, T; Bertrand, B; Bordeaux, M; Bosselmann, AS; Campa, C; Etienne, H; Turreira-Garcia, N; Leran, S; Markussen, B; Marraccini, P; Ramalho, JC; Vaast, P; Raebild, A	2022	Shade effects on yield across different Coffea arabica cultivars - how much is too much? A meta-analysis	The coffee research community has maintained a long ongoing debate regarding the implications of shade trees in coffee production. Historically, there has been contrasting results and opinions on this matter, thus recommendations for the use of shade (namely in coffee agroforestry systems) are often deemed controversial, particularly due to potential yield declines and farmers' income. This study…	The analysis is not based on pairwise comparisons	Andrea	Camille	O
Second search		10.1016/j.crsust.2022.100194	Kuonen, L; Norgrove, L	2022	Mulching on family maize farms in the tropics: A systematic review	Family farms, predominantly reliant on family labour, produce approximately three-quarters of the World's food. Maize (Zea mays) is the world's most produced cereal. Yet in much of the tropics, actual maize yields are far below those attainable with best-bet practices. While any advantage of adding mulch might depend on soil fertility level, mulch quality, amount of rainfall, irrigation, and othe…	The topic of the meta-analysis is out of the scope of this review.	Andrea		O
Kothke	Kothke	10.1080/21513732.2016.1214178	Kuyah, S; Öborn, I; Jonsson, M; Dahlin, A.S; Barrios, E; Muthuri, C; Malmer, A; Nyaga, J; Magaju, C; Namirembe, S; Nyberg, Y; Sinclair, F.L.	2016	Trees in agricultural landscapes enhance provision of ecosystem services in Sub-Saharan Africa.	The recent interest in multi-functional agricultural landscapes has not been matched with formal assessment of the roles that trees play across the spectrum of ecosystem services (ESs) provided in Sub-Saharan Africa (SSA). A structured literature review (1995–2014) assessed 350 journal articles about provision of one or more ESs by trees on farms and in agricultural landscapes in SSA. This reveal…	The systematic review is not presenting quantitative data (either with or without full statistical analysis)	Margret	Camille	O
Second search		10.1016/j.scitotenv.2022.157438	Li, SF; Gong, SS; Hou, YH; Li, XN; Wang, C	2022	The impacts of agroforestry on soil multi-functionality depending on practices and duration	Agroforestry systems provide a wide range of soil multiple functions (that is, soilmulti-functionality) to human society, including the regulation of nutrients and water in soils and the sequestration of atmospheric carbon dioxide, whereas how these effects varied with agroforestry practices and environmental conditions remain unclear. Here, by comparing the soil multi-functionality in agroforest…	The comparator is only natural forests	Camille	Camille	O
Castle	Castle	10.2134/jeq2007.0437	Liu XM, Mang XY, and Zhang MH. (2008). Major factors influencing the efficacy of vegetated buffers on sediment trapping: A review and analysis. Journal of Environmental Quality, 37(5), pp. 1667-1674.	2008	Major factors influencing the efficacy of vegetated buffers on sediment trapping: A review and analysis		The study does not deal with agroforestry systems, according to its definition.	Camille	Camille	O
Second search		10.1016/j.agsy.2023.103606	Low, G; Dalhaus, T; Meuwissen, MPM	2023	Mixed farming and agroforestry systems: A systematic review on value chain implications	CONTEXT: Mixed farming and agroforestry systems (MiFAS) are widely proposed to deal with ecological, eco-nomic, and social challenges that are associated with specialised farming systems. However, little is known about how MiFAS are integrated in food value chains and how value creation in MiFAS is rewarded by value chain actors. OBJECTIVE: We review the broad literature on MiFAS (80 papers) with…	The systematic review is not presenting quantitative data (either with or without full statistical analysis)	Andrea		O
Castle	Castle	10.1016/j.ecoleng.2019.06.004	Lu W., Arias Font R., Cheng S., Wang J., Kollmann J. (2019). Assessing the context and ecological effects of river restoration – A meta-analysis. Ecological Engineering, 136, pp. 30-37.	2019	Assessing the context and ecological effects of river restoration – A meta-analysis		The topic of the meta-analysis is out of the scope of this review.	Camille	Camille	O
Bellouin		10.1080/14735903.2018.1523828	Magombeyi, M. S., Taigbenu, A. E., & Barron, J. (2018). Effectiveness of agricultural water management technologies on rainfed cereals crop yield and runoff in semi-arid catchment: a meta-analysis.æInternational Journal of Agricultural Sustainability, 1-24.		Effectiveness of agricultural water management technologies on rainfed cereals crop yield and runoff in semi-arid catchment: a meta-analysis	Multiple agricultural water management (AWM) technologies are being promoted worldwide in rainfed agro-ecological production systems, such as the Limpopo River Basin, to close the yield gap, enhance food security and reduce poverty, but evidences on yield gains and environmental impacts are varied. This paper conducts a review of the performance of AWM technologies against conventional farmer pra…	The topic of the meta-analysis is out of the scope of this review.	Andrea	Camille	O
Castle	Kothke;Castle	10.1007/s11104-019-04322-4	Marsden C., Martin-Chave A., Cortet J., Hedde M., Capowiez Y.	2020	How agroforestry systems influence soil fauna and their functions - a review		The systematic review is not presenting quantitative data (either with or without full statistical analysis)	Camille	Camille	o
Third search		10.1016/j.ecolind.2023.110875	Mehta, D; Pandey, R; Gupta, AK; Juhola, S	2023	Nature-based solutions in Hindu Kush Himalayas: IUCN global standard based synthesis	Himalayan countries face many ecological challenges, including biodiversity loss and the many threats of climate change. In response, these countries are implementing Nature-based Solution to minimize these challenges and promote sustainable development. In this article we analyze the NbS programs implemented across the Himalayan region and assess the limitations of these NbS using the IUCN stand…	The study does not deal with agroforestry systems, according to its definition.	Camille	Camille	O
Second search		10.1002/cl2.1066	Miller, DC; Ordonez, PJ; Brown, SE; Forrest, S; Nava, NJ; Hughes, K; Baylis, K	2020	The impacts of agroforestry on agricultural productivity, ecosystem services, and human well-being in low-and middle-income countries: An evidence and gap map		The systematic review is not presenting quantitative data (either with or without full statistical analysis)	Camille	Camille	O
Kothke	Kothke	10.1007/s10457-017-0113-6	Mortimer, Roisin; Saj Stephane; David, Christophe	2018	Supporting and regulating ecosystem services in cacao agroforestry systems.	Cacao agroforestry systems (CAFS) can provide supporting services such as optimum light conditions for cacao growth, water and nutrient cycling and regulating services such as pest and disease control and climate regulation. This review considers recent literature on the manifestation of these services in CAFS around the world to provide an overview of scientific knowledge. Crown structures of as…	The systematic review is not presenting quantitative data (either with or without full statistical analysis)	Margret	Margret	O
First search	Kothke	10.1016/j.envsci.2015.10.005	Mukul, SA; Herbohn, J	2016	The impacts of shifting cultivation on secondary forests dynamics in tropics: A synthesis of the key findings and spatio temporal distribution of research	Shifting cultivation has been attributed to causing large-scale deforestation and forest degradation in tropical forest-agriculture frontiers. This view has been embedded in many policy documents in the tropics, although, there are conflicting views within the literature as to the impacts of shifting cultivation. In part, this may be due to the complex nature of this land use making generalizatio…	The comparator is only natural forests		Andrea	O
Castle		10.1186/2047-2382-1-13	Munroe, R., Roe, D., Doswald, N., Spencer, T., Möller, I., Vira, B., Reid, H., Kontoleon, A., Giuliani, A., Castelli, I. and Stephens, J.	2012	Review of the evidence base for ecosystem-based approaches for adaptation to climate change		The systematic review is not presenting quantitative data (either with or without full statistical analysis)	Camille	Camille	o
Second search		10.1016/j.heliyon.2022.e10670	Muthee, K; Duguma, L; Majale, C; Mucheru-Muna, M; Wainaina, P; Minang, P	2022	A quantitative appraisal of selected agroforestry studies in the Sub-Saharan Africa	The multiple ecosystem services and livelihood assets development challenges facing the world, including climate change, land degradation, and high poverty levels, have necessitated cross-cutting solutions. Such includes agroforestry technologies, where trees are integrated with crop and pasture lands to yield multiple ecosystem goods and services. Though an ancient approach to land management, a…	The systematic review is not presenting quantitative data (either with or without full statistical analysis)	Andrea	Camille	O
Third search		10.1016/j.tfp.2023.100432	Muthuri, CW; Kuyah, S; Njenga, M; Kuria, A; Öborn , I; van Noordwijk, M	2023	Agroforestry's contribution to livelihoods and carbon sequestration in East Africa: A systematic review	Agroforestry is a powerful practice for sustainable and regenerative intensification because it promotes multifunctional landscapes that deliver ecological functions that contribute to livelihoods, land productivity, biodiversity conservation, and other ecosystem services. Despite a large body of literature on agroforestry in East Africa, a systematic understanding of its livelihood benefits and …	The analysis is not based on pairwise comparisons	Camille	Camille	O
Third search		10.1007/978-3-030-75358-0_22	Nair P.K.R.; Kumar B.M.; Nair V.D.	2022	Other ecosystem services of agroforestry	This chapter discusses the significant role agroforestry systems (AFS) play in realizing ecosystem services other than soil productivity improvement, climate change mitigation, and biodiversity conservation. Such “other” services include the improvement of hydrological characteristics and water quality, socio-cultural and recreational services, and facilitation for the development of biodiversity…	The systematic review is not presenting quantitative data (either with or without full statistical analysis)	Camille	Andrea	O
Third search		10.1007/978-3-030-75358-0_20	Nair P.K.R.; Kumar B.M.; Nair V.D.	2022	Carbon sequestration and climate change mitigation	This chapter examines the role of agroforestry in carbon sequestration (CS) and climate-change mitigation (CCM) based on the scientific hypotheses, research results, and observations accumulated so far. Since the emergence of climate change (CC) as a prominent global issue in the late twentieth century, agroforestry has received immense attention as a land-management strategy with considerable po…	The systematic review is not presenting quantitative data (either with or without full statistical analysis)	Camille	Camille	O
Kothke	Kothke	10.1080/02571862.2019.1640296	Namirembe, S; Piikki, K.; Sommer, R.; Söderström M.; Tessema, B.; Nyawira, S. S.	2020	Soil organic carbon in agricultural systems of six countries in East Africa – a literature review of status and carbon sequestration potential.	Cropland soils are considered to have the potential to sequester atmospheric CO2 through agronomic best management practices (BMPs). To estimate this potential in East Africa, the authors reviewed 69 published studies from Ethiopia, Kenya, Rwanda, Tanzania, Uganda, and Burundi assessing the effect of land use conversion from native vegetation to cropland on soil organic carbon (SOC) and the exten…	The analysis is not based on pairwise comparisons	Margret	Camille	O
fourth search		10.1007/s11027-024-10126-4	Naveen, N; Datta, P; Behera, B; Rahut, DB	2024	Climate-Smart Agriculture in South Asia: exploring practices, determinants, and contribution to Sustainable Development Goals	In the face of unprecedented challenges arising from climate change, Climate-Smart Agriculture (CSA) emerges as a holistic solution for South Asia, addressing adaptation, mitigation, and Sustainable Development Goals (SDGs). However, a substantial knowledge gap exists regarding the current status of CSA practices, the factors influencing their adoption, and the specific SDGs that benefit from suc…	The systematic review is not presenting quantitative data (either with or without full statistical analysis)	Camille	Camille	O
Third search		10.1016/j.ccst.2022.100065	Nayak, N; Mehrotra, R; Mehrotra, S	2022	Carbon biosequestration strategies: a review	Anthropogenic emissions of carbon dioxide (CO2) contribute to global warming. Limiting temperature rise re-quires negative emission techniques to retract the emitted CO2 from the atmosphere. Through photosynthesis, ecosystems naturally sequester and store carbon. Enhancing these processes forms the basis of biological seques-tration strategies. Ecosystems are a sink of atmospheric CO2 and signifi…	The paper is neither a systematic review nor a meta-analysis of primary research.	Camille	Camille	O
First search	Kothke	10.1016/j.biocon.2007.01.023	Nichols, E; Larsen, T; Spector, S; Davis, AL; Escobar, F; Favila, M; Vuline, K	2007	Global dung beetle response to tropical forest modification and fragmentation: A quantitative literature review and meta-analysis	Although insects are crucial for maintaining ecosystem function, our understanding of their overall response to human activity remains limited. This is no less true of dung-burying beetles (Coleoptera: Scarabaeidae: Scarabaeinae), which provide a suite of critical ecosystem functions and services, yet but face multiple conservation threats, particularly from landscape conversion. Here we use a re…	The comparator is only natural forests		Marta	O
Second search		10.1007/s13593-022-00808-1	Nord, A; Snapp, S; Traore, B	2022	Current knowledge on practices targeting soil fertility and agricultural land rehabilitation in the Sahel. A review	Implementing sustainable production practices to rehabilitate soils is a grand challenge of our day, particularly for resource-poor farmers. The West African Sahel requires attention to balancing the need for increasing agricultural production against harsh environmental conditions. While there is much research documenting technologies for soil regeneration in the Sahel, there has been limited fo…	The systematic review is not presenting quantitative data (either with or without full statistical analysis)	Andrea		O
Third search		10.1016/j.forpol.2023.102937	Ntawuruhunga, D; Ngowi, EE; Mangi, HO; Salanga, RJ; Shikuku, KM	2023	Climate-smart agroforestry systems and practices: A systematic review of what works, what doesn't work, and why	The prevailing global environmental distress, particularly in rural areas, calls for the adoption of integrated sustainable rural development strategies like climate-smart agroforestry (CSA) practices. CSAF is a new name for an old farming practice among the world's traditional farmers, a holistic approach to land use in which trees, crops, and sometimes animals are combined within a managed farm…	The systematic review is not presenting quantitative data (either with or without full statistical analysis)	Camille	Camille	O
Third search		10.1080/21580103.2023.2269970	Octavia, D; Suharti, S; Hani, A; Mindawati, N; Suratman; Swestiani, D; Junaedi, A; Undaharta, NKE; Santosa, PB; Wahyuningtyas, RS; Faubiany, V	2023	Smart agroforestry for sustaining soil fertility and community livelihood	Smart Agroforestry (SAF) is believed to be one of the alternative solutions in implementing sustainable forest management to achieve the community welfare. SAF provides agricultural and silvicultural knowledge and practices that aims not only for recovering the environmental attributes but also for increasing farmers resilience. However, the benefits of agroforestry related to soil fertility in o…	The systematic review is not presenting quantitative data (either with or without full statistical analysis)	Camille	Camille	O
Second search		10.1016/j.landusepol.2022.106237	Ojha, RB; Atreya, K; Kristiansen, P; Devkota, D; Wilson, B	2022	A systematic review and gap analysis of drivers, impacts, and restoration options for abandoned croplands in Nepal	Cropland abandonment is an emerging human-induced land use and is a growing national problem in Nepal. It is a key, current concern for local governance bodies and restoration options for this land are being actively sought. We initiated a systematic review of existing studies to identify the key causes and impacts of cropland abandonment and consider a range of restoration options. Data on the d…	The systematic review is not presenting quantitative data (either with or without full statistical analysis)	Andrea		O
First search			Oladele, OI; Braimoh, AK	2013	Climate change mitigation potential of tree crop and alley farming practices in Africa	This paper examines tree crop farming and alley farming practices in Africa and the impact of such practices on carbon sequestration and climate change mitigation. Using a meta-analysis approach, estimates of soil carbon and organic matter accumulated due to tree crop farming and alley farming were standardized due to different units of reporting for soil carbon. A review of the scientific litera…	The full text is not available		David	O
Castle		10.1016/j.biocon.2019.07.007	Öllerer K., Varga A., Kirby K., Demeter L., Biró M., Bölöni J., Molnár Z.	2019	Beyond the obvious impact of domestic livestock grazing on temperate forest vegetation – A global review		The systematic review is not presenting quantitative data (either with or without full statistical analysis)	Camille	Camille	o
Castle		10.1186/s13750-018-0122-6	Ottoy, S., Angileri, V., Gibert, C., Paracchini, M.L., Pointereau, P., Terres, J.M., Van Orshoven, J., Vranken, L. and Dicks, L.V.	2018	Impacts of selected Ecological Focus Area options in European farmed landscapes on climate regulation and pollination services: a systematic map protocol		The systematic review is not presenting quantitative data (either with or without full statistical analysis)	Camille	Camille	o
First search		10.1007/s10457-012-9571-z	Palacios, CP; Aguero, B; Simonetti, JA	2013	Agroforestry systems as habitat for herpetofauna: is there supporting evidence?	The need to carry out biological conservation outside protected areas requires avoiding, minimizing or mitigating impacts brought about by habitat transformation upon the biota. Usually, forest plantations hold fewer species than the original forest. However, structurally complex plantations support more species and individuals than simpler ones. Here we test if this phenomenon occurs in amphibia…	The systematic review is not presenting quantitative data (either with or without full statistical analysis)		David	O
Second search		10.3390/f13081274	Panwar, P; Mahalingappa, DG; Kaushal, R; Bhardwaj, DR; Chakravarty, S; Shukla, G; Thakur, NS; Chavan, SB; Pal, S; Nayak, BG; Srinivasaiah, HT; Dharmaraj, R; Veerabhadraswamy, N; Apshahana, K; Suresh, CP; Kumar, D; Sharma, P; Kakade, V; Nagaraja, MS; Singh, M; Das, S; Tamang, M; Kanchan; Roy, AD; Gurung, T	2022	Biomass Production and Carbon Sequestration Potential of Different Agroforestry Systems in India: A Critical Review	Agroforestry systems (AFS) and practices followed in India are highly diverse due to varied climatic conditions ranging from temperate to humid tropics. The estimated area under AFS in India is 13.75 million ha with the highest concentration being in the states of Uttar Pradesh (1.86 million ha), followed by Maharashtra (1.61 million ha), Rajasthan (1.55 million ha) and Andhra Pradesh (1.17 milli…	The analysis is not based on pairwise comparisons	Camille	Camille	O
Castle	Kothke-Castle	10.1016/j.mambio.2014.10.004	Park KJ. (2015). Mitigating the impacts of agriculture on biodiversity: bats and their potential role as bioindicators. Mammalian Biology, 80(3), pp.191-204.	2015	Mitigating the impacts of agriculture on biodiversity: bats and their potential role as bioindicators		The systematic review is not presenting quantitative data (either with or without full statistical analysis)	Andrea		O
First search		10.1023/A:1024809108210	Pattanayak, SK; Mercer, DE; Sills, E; Yang, JC	2003	Taking stock of agroforestry adoption studies	In light of the large number of empirical studies of agroforestry adoption published during the last decade, we believe it is time to take stock and identify general determinants of agroforestry adoption. In reviewing 120 articles on adoption of agricultural and forestry technology by small holders, we find five categories of factors that explain technology adoption within an economic framework: …	The systematic review is not presenting quantitative data (either with or without full statistical analysis)		Marta	O
Second search		10.46488/NEPT.2022.v21i04.023	Quiñones-Huatangari L.; Fernandez-Zarate F.H.; Huaccha-Castillo A.E.	2022	Nitrous Oxide Emissions Generated in Coffee Cultivation: A Systematic Review	The objective of the research was to provide an overview of soil N2O emissions in coffee cropping systems; summarizing available field data on soil emissions and identifying controlling factors (fertilizer type, precipitation, temperature, altitude). A systematic search of Scopus, Science Direct, Springer, and Scielo for experimental-type studies was conducted from January 2000 to October 2021. O…	The paper is neither a systematic review nor a meta-analysis of primary research.	Camille	Camille	O
Castle		10.1186/s13750-015-0044-5	Randall N P; Donnison L M; Lewis P J; James K L;	2015	How effective are on-farm mitigation measures for delivering an improved water environment? A systematic map		The systematic review is not presenting quantitative data (either with or without full statistical analysis)	Camille	Camille	o
Castle		10.1016/j.forpol.2017.01.012	Reed J ; van Vianen J ; Foli S ; Clendenning J ; Yang K ; MacDonald M ; Petrokofsky G ; Padoch C ; Sunderland T ;	2017	Trees for life: The ecosystem service contribution of trees to food production and livelihoods in the tropics		The systematic review is not presenting quantitative data (either with or without full statistical analysis)	Camille	Camille	o
Second search		10.1016/j.gfs.2021.100553	Reich, J; Paul, SS; Snapp, SS	2021	Highly variable performance of sustainable intensification on smallholder farms: A systematic review	A global-scale systematic review (n = 241) assessed sustainable intensification (SI) technologies within smallholder agriculture; it considered multiple dimensions of performance and systematically assessed direction of response. Crop yield was overwhelmingly the top indicator. Monitoring gaps included few long-term studies (>3 years) and limited assessments of soil C stocks, food security, gende…	The systematic review is not presenting quantitative data (either with or without full statistical analysis)	Camille	Camille	O
Kothke	Kothke	10.1126/science.abm9267	Ribeiro Filho, A.A.; Adams, C.; Manfredini, S.; Aguilar, R.; Neves, W.A.	2015	Dynamics of soil chemical properties in shifting cultivation systems in the tropics: a meta-analysis.	Tropical deforestation continues at alarming rates with profound impacts on ecosystems, climate, and livelihoods, prompting renewed commitments to halt its continuation. Although it is well established that agriculture is a dominant driver of deforestation, rates and mechanisms remain disputed and often lack a clear evidence base. We synthesize the best available pantropical evidence to provide c…	The comparator is only natural forests	Margret		O
Kothke	Kothke	10.1590/S1981-81222013000300013	Ribeiro Filho, Alexandre Antunes; Adams, Cristina; Sereni Murrieta, Rui Sergio	2013	The impacts of shifting cultivation on tropical forest soil: a review.	The sustainability of shifting cultivation is presently a topic of debate in scientific and institutional communities; however, there is no current consensus. To address this debate, we performed a search of the pertinent literature that was published during the last 30 years on the impact of shifting agriculture on tropical soils. This search revealed that the nature of the impact depends on the…	The study does not deal with agroforestry systems, according to its definition.	Margret	Camille	O
Bellouin		Not available	Riiser N.M, Hansen T.R.	2014	The Favorability of Rice-Agroforestry. A meta-Analysis on Yield and Soil Parameters.		The full text is not available	Andrea	Camille	O
Second search		10.1016/j.scitotenv.2023.161663	Rivera J.D.; de los Monteros A.E.; Saldaña-Vázquez R.A.; Favila M.E.	2023	Beyond species loss: How anthropogenic disturbances drive functional and phylogenetic homogenization of Neotropical dung beetles	Anthropogenic activities drive tropical forest loss and biodiversity decay. However, few studies have addressed how the biodiversity response varies between disturbance-adapted species (i.e., winners) and those highly susceptible to disturbance (i.e., losers), or whether such responses differ between the taxonomic, functional, or phylogenetic dimensions of diversity. Understanding these dynamics …	The comparator is only natural forests	Andrea	Camille	O
Bellouin			Rosalien, E.J., Pita, A.V., Maria, J.S., Rene, G.A.B., 2017. Shaded Coffee and Cocoa - Double Dividend for Biodiversity and Small-scale Farmers. Ecological Economics 140, 136-145.				The analysis is not based on pairwise comparisons	Andrea	Camille	O
First search		10.1080/10549811.2011.588457	Rudel T.K.,	2012	The Human Ecology of Regrowth in the Tropics,	As the losses of tropical forests have accumulated over the past three decades, largely deforested areas have increased in extent in the tropics, and observers have begun to ask questions about the circumstances under which tropical forests reemerge in deforested areas. This article addresses these questions through a meta-analysis of 63 case studies of tropical forest cover change that report ne…	The topic of the meta-analysis is out of the scope of this review.		David	O
First search		10.1007/s11104-012-1281-9	Sang, PM; Lamb, D; Bonner, M; Schmidt, S	2013	Carbon sequestration and soil fertility of tropical tree plantations and secondary forest established on degraded land	Much tropical land requires rehabilitation but the capacity of reforestation with plantations or naturally regenerating secondary forests for overcoming soil degradation remains unclear. We hypothesised that desirable effects, including improved soil fertility and carbon sequestration, are achieved to a greater extent in Acacia mangium plantations and secondary forests than in Eucalyptus urophyll…	The paper is neither a systematic review nor a meta-analysis of primary research.	Camille	Camille	O
Third search		10.21930/rcta.vol24_num2_art:3048	Saucedo-Uriarte, JA; Diaz-Quevedo, C; Pino, MEM; Chávez, LMD; Rivera, JLL; Pérez, HVV; Quispe-Ccasa, HA	2023	Productive sustainability of the installation of silvopastoral systems: A systematic review based on the reality of Peru and Colombia	Most of the world's livestock is developed in open field or monoculture systems, which generates economic and environmental losses, such as soil erosion, loss of biodiversity of flora and fauna, low meat and milk production, and less monetary income. Faced with this situation, there are sustainable alternatives for livestock production, which are friendly to the environment, being silvopastoral s…	The paper is not written in English.	Camille	Camille	O
Kothke	Kothke	10.1017/S0376892908004840	Scales, Ben R.; Marsden, Stuart J.	2008	Biodiversity in small-scale tropical agroforests: a review of species richness and abundance shifts and the factors influencing them.	Although small-scale agroforestry systems (swiddens, complex and single-crop-dominated agroforests, and homegardens) form a diverse and important tropical land use, there has been no attempt to collate information on their value for biodiversity. This paper reviews 52 published studies that compared species richness and/or abundance between agroforests and primary forest, and 27 studies that comp…	The comparator is only natural forests	Margret		O
First search		10.1016/j.atmosenv.2013.02.009	Shan, J; Yan, XY	2013	Effects of crop residue returning on nitrous oxide emissions in agricultural soils	Crop residue returning is a common practice in agricultural system that consequently influences nitrous oxide (N2O) emissions. Much attention has been focused on the effects of crop residue on N2O release. However, no systematic result has yet been drawn because environmental factors among different studies vary. A meta-analysis was described to integrate 112 scientific assessments of crop residu…	The topic of the meta-analysis is out of the scope of this review.	Camille	Camille	O
Castle		10.3390/f11040368	Shin S, Soe KT, Lee H, Kim TH, Lee S, Park MS	2020	A Systematic Map of Agroforestry Research Focusing on Ecosystem Services in the Asia-Pacific Region		The systematic review is not presenting quantitative data (either with or without full statistical analysis)	Camille	Camille	o
First search		10.1016/j.agee.2014.11.009	Sinare, H; Gordon, LJ.	2015	Ecosystem services from woody vegetation on agricultural lands in Sudano-Sahelian West Africa.		The systematic review is not presenting quantitative data (either with or without full statistical analysis)	Camille	Camille	O
fourth search		10.1016/j.heliyon.2024.e26103	Sinore, T; Wang, F	2024	Impact of climate change on agriculture and adaptation strategies in Ethiopia: A meta-analysis	Ethiopia is a rainfall-based agricultural country that is susceptible to the impacts of climate change and risk. Floods and droughts, which happen more frequently and intensely, significantly and negatively influence agricultural production. The objective of the meta-analysis is to identify impacts on various sectors, adaptation strategies, and the challenges of climate change in the Ethiopian co…	The topic of the meta-analysis is out of the scope of this review.	Camille	Camille	O
Second search		10.1016/j.agsy.2020.103032	Smith, MM; Bentrup, G; Kellerman, T; MacFarland, K; Straight, R; Ameyaw, L	2021	Windbreaks in the United States: A systematic review of producer-reported benefits, challenges, management activities and drivers of adoption	Windbreaks are an agroforestry practice used to provide simultaneous economic, environmental and social benefits that occur when trees are deliberately integrated into an agroecosystem. To date, no systematic review has been conducted on windbreak adoption in the U.S., which is needed to assess whether broader trends exist that may affect future research, extension delivery and policy development…	The systematic review is not presenting quantitative data (either with or without full statistical analysis)	Andrea	Camille	O
Second search		10.1016/j.agee.2021.107818	Smith, MM; Bentrup, G; Kellerman, T; MacFarland, K; Straight, R; Ameyaw, L; Stein, S	2022	Silvopasture in the USA: A systematic review of natural resource professional and producer-reported benefits, challenges, and management activities	Silvopasture is the deliberate integration of trees, forage, and grazing livestock on the same piece of land. These agroecosystems are intensively managed for multiple benefits, providing both short-and long-term income. Research suggests that silvopasture systems can increase systemwide productivity, while providing multiple ecosystem services. Due to these benefits, silvopasture adoption is inc…	The systematic review is not presenting quantitative data (either with or without full statistical analysis)	Andrea	Camille	O
Third search		10.1016/j.jafr.2023.100655	Tadesse, B; Ahmed, M	2023	Impact of adoption of climate smart agricultural practices to minimize production risk in Ethiopia: A systematic review	Climate change influences agriculture in sub Saharan Africa. The climate-smart agriculture approach is emerging as a new paradigm for adapting agriculture to the changing climate and mitigation. The main aim of this review was to assess the climate smart agriculture practice, factors affecting it and impact of climate smart agriculture. It was conducted by following systematic review procedures. …	The systematic review is not presenting quantitative data (either with or without full statistical analysis)	Camille	Camille	O
Third search		10.1016/j.agee.2023.108450	Tan, SSX; Kuebbing, SE	2023	A synthesis of the effect of regenerative agriculture on soil carbon sequestration in Southeast Asian croplands	Policymakers and businesses in Southeast Asia are increasingly interested in using carbon markets to encourage adoption of regenerative agriculture practices by farmers. These practices are thought to mitigate climate change by reducing soil carbon loss and enhancing soil carbon sequestration. However, there is uncertainty in the ability of regenerative agriculture practices to increase soil orga…	The systematic review is not presenting quantitative data (either with or without full statistical analysis)	Camille	Camille	O
Second search		10.1186/s13750-016-0064-9	Thorn, JPR; Friedman, R; Benz, D; Willis, KJ; Petrokofsky, G	2016	What evidence exists for the effectiveness of on-farm conservation land management strategies for preserving ecosystem services in developing countries? A systematic map	Background: An extensive body of evidence in the field of agro-ecology claims to show the positive effects that maintenance of ecosystem services can have on meeting future food demand by making farms more sustainable, productive and resilient, which then contributes to improved nutrition and livelihoods of farmers. However, inconsistent effects have commonly been reported, while empirical eviden…	The systematic review is not presenting quantitative data (either with or without full statistical analysis)	Camille	Camille	O
First search		10.3390/su11102879	Udawatta, RP; Rankoth, LM; Jose, S	2019	Agroforestry and Biodiversity	Declining biodiversity (BD) is affecting food security, agricultural sustainability, and environmental quality. Agroforestry (AF) is recognized as a possible partial solution for BD conservation and improvement. This manuscript uses published peer-reviewed manuscripts, reviews, meta-analysis, and federal and state agency documents to evaluate relationships between AF and BD and how AF can be used…	The paper is neither a systematic review nor a meta-analysis of primary research.		Andrea	O
Third search		10.3934/agrfood.2023041	Ulya, NA; Harianja, AH; Sayekti, AL; Yulianti, A; Djaenudin, D; Martin, E; Hariyadi, H; Witjaksono, J; Malau, LRE; Mudhofir, MRT; Astana, S	2023	Coffee agroforestry as an alternative to the implementation of green economy practices in Indonesia: A systematic review	Agroforestry systems, particularly the coffee agroforestry system (CAS), represent a promising approach to achieving sustainable development and promoting a green economy in Indonesia. Our research aims to explore the potential of CAS to provide ecosystem services and socio-economic benefits and address environmental risks in Indonesia. To critically analyze the current state of CAS in Indonesia,…	The systematic review is not presenting quantitative data (either with or without full statistical analysis)	Camille	Camille	O
First search		10.1016/j.envsci.2004.05.006	van Kooten, GC; Eagle, AJ; Manley, J; Smolak, T	2004	How costly are carbon offsets? A meta-analysis of carbon forest sinks	Carbon terrestrial sinks are seen as a low-cost alternative to fuel switching and reduced fossil fuel use for lowering atmospheric CO2. As a result of agreements reached at Bonn and Marrakech, carbon offsets have taken on much greater importance in meeting Kyoto targets for the first commitment period. In this study, meta-regression analysis is used to examine 981 estimates from 55 studies of the…	The topic of the meta-analysis is out of the scope of this review.		Marta	O
Kothke	Kothke	10.1016/j.jaridenv.2015.05.015	van Oudenhoven, Alexander P. E.; Veerkamp, Clara J.; Alkemade, Rob; Leemans, Rik	2015	Effects of different management regimes on soil erosion and surface runoff in semi-arid to sub-humid rangelands.	Over one billion people's livelihoods depend on dry rangelands through livestock grazing and agriculture. Livestock grazing and other management activities can cause soil erosion, increase surface runoff and reduce water availability. We studied the effects of different management regimes on soil erosion and surface runoff in semi-arid to sub-humid rangelands. Eleven management regimes were asses…	The analysis is not based on pairwise comparisons	Margret	Margret	O
Castle		10.1016/j.jnc.2020.125837	Velamazán M., Perea R., Bugalho M.N.	2020	Ungulates and ecosystem services in Mediterranean woody systems: A semi-quantitative review		The systematic review is not presenting quantitative data (either with or without full statistical analysis)	Camille	Camille	o
Kothke	Kothke;Castle	10.1007/978-3-319-25220-9_6	Williams-Guillén, K; Olimpi, E; Maas, B; Taylor, P.J; Arlettaz, R.	2015	Bats in the Anthropogenic Matrix: Challenges and Opportunities for the Conservation of Chiroptera and Their Ecosystem Services in Agricultural Landscapes.	Intensification in land-use and farming practices has had largely negative effects on bats, leading to population declines and concomitant losses of ecosystem services. Current trends in land-use change suggest that agricultural areas will further expand, while production systems may either experience further intensification (particularly in developing nations) or become more environmentally frie…	The comparator is only natural forests	Margret	Camille	O
Third search		10.15302/J-FASE-2022474	Wu, LH	2023	SEQUESTERING ORGANIC CARBON IN SOILS THROUGH LAND USE CHANGE AND AGRICULTURAL PRACTICES: A REVIEW	Climate change vigorously threats human livelihoods, places and biodiversity. To lock atmospheric CO2 up through biological, chemical and physical processes is one of the pathways to mitigate climate change. Agricultural soils have a significant carbon sink capacity. Soil carbon sequestration (SCS) can be accelerated through appropriate changes in land use and agricultural practices. There have b…	The paper is neither a systematic review nor a meta-analysis of primary research.	Camille	Camille	O
fourth search		10.1016/j.ecoser.2024.101634	Yang, YL; Xiong, KN; Xiao, J	2024	A review of agroforestry biodiversity-driven provision of ecosystem services and implications for karst desertification control	Biodiversity conservation is critical for sustaining ecosystem services (ES) and preventing ecological degradation. In ecologically fragile environments, agroforestry (AF) plays a crucial role. This study aims to provide a comprehensive overview of biodiversity and ES in AF systems (AF-BES) to enhance the service capacity in karst desertification areas through protection and management strategies…	The systematic review is not presenting quantitative data (either with or without full statistical analysis)	Camille	Camille	O
Third search		10.3390/land12020513	Yasin, G; Nawaz, MF; Zubair, M; Azhar, MF; Gilani, MM; Ashraf, MN; Qin, AZ; Rahman, SU	2023	Role of Traditional Agroforestry Systems in Climate Change Mitigation through Carbon Sequestration: An Investigation from the Semi-Arid Region of Pakistan	Several agroforestry systems prevail in different agro-ecological zones of Pakistan, and cover a remarkable area of 19.3 million hectares. They not only play an important role in slowing down CO2 emissions, but also contribute to mitigating climate change. However, in many regions, the relevant effect of agroforestry systems on overall carbon (C) stock and their reliance on various factors are qu…	The paper is neither a systematic review nor a meta-analysis of primary research.	Camille	Camille	O
Second search		10.3389/fsufs.2021.715814	Yeboah, S; Danquah, EO; Oteng-Darko, P; Agyeman, K; Tetteh, EN	2021	Carbon Smart Strategies for Enhanced Food System Resilience Under a Changing Climate	There is an urgent need to match food production with increasing world population through identification of sustainable land management strategies. However, the struggle to achieve food security should be carried out keeping in mind the soil where the crops are grown and the environment in which the living things survive, especially under rainfed agricultural system. Rainfed agricultural ecosyste…	The paper is neither a systematic review nor a meta-analysis of primary research.	Camille	Camille	O
fourth search		10.3390/cli12030033	Zenda, M; Rudolph, M	2024	A Systematic Review of Agroecology Strategies for Adapting to Climate Change Impacts on Smallholder Crop Farmers' Livelihoods in South Africa	This systematic review identified the prevalence, effectiveness, and potential benefits of agroecology strategies in promoting sustainable agriculture practices implemented by smallholder crop farmers in South Africa. The review carried out a comprehensive literature search across various academic databases, including PubMed, Scopus, and Web of science. The relevant studies were screened and sele…	The topic of the meta-analysis is out of the scope of this review.	Camille	Camille	O
First search		10.1111/j.1365-2486.2012.02747.x	Ziegler, AD; Phelps, J; Yuen, JQ; Webb, EL; Lawrence, D; Fox, JM; Bruun, TB; Leisz, SJ; Ryan, CM; Dressler, W; Mertz, O; Pascual, U; Padoch, C; Koh, LP	2012	Carbon outcomes of major land-cover transitions in SE Asia: great uncertainties and REDD plus policy implications	Policy makers across the tropics propose that carbon finance could provide incentives for forest frontier communities to transition away from swidden agriculture (slash-and-burn or shifting cultivation) to other systems that potentially reduce emissions and/or increase carbon sequestration. However, there is little certainty regarding the carbon outcomes of many key land-use transitions at the ce…	The analysis is not based on pairwise comparisons	Camille	Camille	O
fourth search		10.1088/1755-1315/1315/1/012010		2024	The Flexibility of Sengon Agroforestry in Small-Scale Forest Development in Indonesia		The topic of the meta-analysis is out of the scope of this review.	Camille	Camille	O
First search	Kothke	10.1007/s10457-013-9603-3	Poch, TJ; Simonetti, JA	2013	Ecosystem services in human-dominated landscapes: insectivory in agroforestry systems	Despite of being structurally simpler and species-impoverished than natural forests, agroforestry plantations can act as a secondary habitat for native species and sustain some biodiversity. In particular, insectivores can provide important ecosystem services such as insectivory, indirectly benefiting plants through the reduction of herbivory and increasing productivity, by diminishing herbivores…	The comparator is only natural forests		Andrea	R	Margret
Second search		10.1371/journal.pone.0173547		2017	Correction: What is a "community perception" of REDD+? A systematic review of how perceptions of REDD+ have been elicited and reported in the literature (PLoS ONE (2016) 11: 11 (e0155636) DOI: 10.1371/journal.pone.0155636)	There are errors in the Funding section. The correct funding information is as follows: This research is part of the CGIAR Research Program on Forests, Trees and Agroforestry and the Global Comparative Study on REDD+, with funding support from the USAID (grant number MTO069018, http://www.usaid.gov/), the Norwegian Agency for Development Cooperation (Norad) (grant number QZA 12/0882 and QZA-16/01…	The topic of the meta-analysis is out of the scope of this review.	Camille		R
fourth search		10.1016/j.agsy.2023.103799	Ahimbisibwe, V; Zhunusova, E; Kassa, H; Guenter, S	2024	Technical efficiency drivers of farmer-led restoration strategies, and how substantial is the unrealised potential for farm output?	CONTEXT: In Ethiopia, similar to other parts of Sub-Saharan Africa, the effects of farmland degradation on ecosystem services and well-being are especially prominent as 85% of the population lives in rural areas and depends on agriculture for their livelihoods. Existing farmer-led restoration activities involve integrating trees on farms (ToF) through traditional agroforestry or woodlots systems.…	The topic of the meta-analysis is out of the scope of this review.	Camille		R
fourth search		10.3390/agronomy14030431	Ali, SA; Tallou, A; Vivaldi, GA; Camposeo, S; Ferrara, G; Sanesi, G	2024	Revitalization Potential of Marginal Areas for Sustainable Rural Development in the Puglia Region, Southern Italy: Part I: A Review	Feeding nine billion people by 2050 will be a challenge due to climate change. There is a significant portion of abandoned and unused marginal lands across the nation and in the Puglia region, in Southern Italy. Innovative techniques and practices in the frame of climate-smart agriculture can help rehabilitate marginal lands into productive and profitable areas. The objective of this study was to…	The paper is neither a systematic review nor a meta-analysis of primary research.	Camille		R
Second search		10.1111/nyas.14690	Almaraz M.; Wong M.Y.; Geoghegan E.K.; Houlton B.Z.	2021	A review of carbon farming impacts on nitrogen cycling, retention, and loss	Soil carbon (C) sequestration in agricultural working lands via soil amendments and management practices is considered a relatively well-tested and affordable approach for removing CO2 from the atmosphere. Carbon farming provides useful benefits for soil health, biomass production, and crop resilience, but the effects of different soil C sequestration approaches on the nitrogen (N) cycle remain c…	The paper is neither a systematic review nor a meta-analysis of primary research.	Camille		R
fourth search		10.5380/dma.v62i0.84539	Almeida, A; Ferreira, JN; Coudel, ES	2023	Perception of ecosystem services by family farmers in the municipality of Irituia/PA, Eastern Amazon: subsidies for forest restoration	Due to the lack of studies about the sociocultural dimension of ecosystem services, we analyze in this work the perception of these benefits by family farmers who have agroforestry systems in the northeast of Para, in the Amazon region. With this objective, we categorize forest restoration strategies based on primary data collection -interviews, semi structured questionnaire, illustrated question…	The topic of the meta-analysis is out of the scope of this review.	Camille		R
Second search		10.1016/j.forpol.2020.102299	Amare, D; Darr, D	2020	Agroforestry adoption as a systems concept: A review	Adoption of innovations is central to improved livelihoods of smallholders and agricultural modernization. The means of achieving optimum adoption rates, however, remain blurred amidst decades of research and interventions. This paper employed both content and meta-analysis to summarize the theoretical and empirical studies conducted in the past three decades in agroforestry (AF) adoption practic…	The topic of the meta-analysis is out of the scope of this review.	Camille		R
Second search		10.1016/j.geoderma.2019.07.008	An, H; Wu, XZ; Zhang, YR; Tang, ZS	2019	Effects of land-use change on soil inorganic carbon: A meta-analysis	Understanding the changes in soil inorganic carbon (SIC) resulting from land-use change is vital for evaluating terrestrial soil C stocks and predicting global change. However, a comprehensive and quantitative understanding of the impacts of land-use change (LUC) on SIC is lacking. We conducted a meta-analysis to assess the effects of land-use change on SIC based on 576 data points obtained from …	The study does not deal with agroforestry systems, according to its definition.	Camille		R
Third search		10.3389/fevo.2023.1084009	Arellano, L; Noriega, JA; Ortega-Martínez, IJ; Rivera, JD; Correa, CMA; Gómez-Cifuentes, A; Ramírez-Hernández, A; Barragán, F	2023	Dung beetles (Coleoptera: Scarabaeidae) in grazing lands of the Neotropics: A review of patterns and research trends of taxonomic and functional diversity, and functions	Dung beetles are one of the most representative groups of insects associated with livestock, as they take advantage of the manure of livestock for food and reproduction. They have been widely used as a bio-indicator group to evaluate their responses to land-use change and other environmental disturbances by analyzing species diversity at different spatial and temporal scales. However, the impacts…	The study does not deal with agroforestry systems, according to its definition.	Camille		R
Second search		10.1016/j.scitotenv.2022.159301	Aryal, K; Maraseni, T; Apan, A	2022	Transforming agroforestry in contested landscapes: A win-win solution to trade-offs in ecosystem services in Nepal	Trade-offs in ecosystem services (ES) is increasingly becoming a pressing issue in sustainability science, to deal with supply constraints of landscape and divergence in demand from local and global stakeholders. Agroforestry is a well acknowledged and established management practice to minimize the trade-offs, and to sustainably manage the contested landscapes while satisfying the growing demand…	The topic of the meta-analysis is out of the scope of this review.	Camille		R
Second search		10.3390/rs13030429	Azizan, FA; Kiloes, AM; Astuti, IS; Aziz, AA	2021	Application of Optical Remote Sensing in Rubber Plantations: A Systematic Review	Rubber (Hevea brasiliensis) is a tropical tree crop cultivated for the industrial production of latex. The trees are tall, perennial and long-lived, and are typically grown in plantations. In most rubber-producing countries, smallholders account for more than 85% of plantation area. Traditional practices mean that it can be difficult to monitor rubber plantations for management purposes. To overc…	The topic of the meta-analysis is out of the scope of this review.	Camille		R
Second search		10.13745/j.esf.sf.2021.6.20	Bai Z.	2021	The major issues in ecological restoration of China's territorial space; [国土空间生态修复若干重大问题研究]	Ecological restoration of China's territorial space is fundamental to sustainable development of the Chinese nation in building a beautiful country. The research methods used in this study included comprehensive literature analysis, systematic review, empirical and analogous analyses, trend extrapolation, and environmental impact assessment. This paper systematically examined the territorial ecol…	The paper is not written in English.	Camille		R
Third search		10.1016/j.ecolmodel.2023.110410	Barbosa, LO; dos Santos, JA; Gonralves, AFA; Campoe, OC; Scolforo, JRS; Scolforo, HF	2023	Competition in forest plantations: Empirical and process-based modelling in pine and eucalypt plantations	Competition for resources among trees, shrubs and weeds in forest plantations is an important factor that directly interferes with the growth and production of forests. Understanding the ways in which plantation trees compete for resources during their development helps to more accurately estimate tree growth and wood production in models. Growth and production models are classified as empirical …	The study does not deal with agroforestry systems, according to its definition.	Camille		R
Third search		10.1016/j.rineng.2023.101500	Bastos T.; Teixeira L.C.; Matias J.C.O.; Nunes L.J.R.	2023	Optimizing the agroforestry residual biomass supply chain: A disruptive tool for mitigating logistic costs and enhancing forest management	In a world with different energy needs, and more focused on renewable energies, biomass makes a very positive contribution. As a way of not creating more pressure on the forest, reducing the combustible loads of the forest, and reducing forest fires, residual biomass becomes an interesting resource. However, logistical costs and lack of information are threats to this valorization. In this sense,…	The topic of the meta-analysis is out of the scope of this review.	Camille		R
First search		10.1016/j.dib.2019.103898	Beillouin, D; Ben-Ari, T; Makowski, D	2019	g	Numerous meta-analyses have been conducted in the last three decades to assess the productive and environmental benefits resulting from a diversification of cropping systems. These meta-analyses assessed one or several diversification strategies (e.g., rotations, cover crops, agroforestry) according to various outcomes (e.g., productivity, profitability, biodiversity). To date, no dataset has pro…			No	R
First search		10.1088/1748-9326/ab4449	Beillouin, D; Ben-Ari, T; Makowski, D	2019	Evidence map of crop diversification strategies at the global scale	The diversification of cropping systems encompasses different strategies that may help maintain or enhance the sustainability of agriculture. Thousands of experiments have been carried out around the world since almost five decades to evaluate and compare the performances of various diversification strategies in a wide array of agroecosystems and climates. Although these analyses have been synthe…			No	R
Third search		10.1186/s13717-020-00270-5	Belayneh, M; Yirgu, T; Tsegaye, D	2020	Runoff and soil loss responses of cultivated land managed with graded soil bunds of different ages in the Upper Blue Nile basin, Ethiopia	Background In view of a wide range of on-site and off-site impacts of soil erosion, different soil and water conservation measures have been implemented mainly over the last two decades in the Gumara watershed and Ethiopia at large. But their effects have not been sufficiently documented, and maintenance of structures received very little attention. This study investigated the effectiveness of gr…	The study does not deal with agroforestry systems, according to its definition.	Camille		R
fourth search		10.1080/21683565.2023.2288318	Benavides-Frias, C; Przychodzka, SO; Díaz-Reviriego, I; Oteros-Rozas, E; Burke, L; Hanspach, J	2024	Exploring the works with nature pillar of food sovereignty: a review of empirical cases in academic literature	Food Sovereignty (FS) is growing in popularity in food-nature academic discussions. This systematic review depicts 1) the level of engagement and 2) the topics related to the Works with Nature pillar (WwNP) of food sovereignty present in the academic literature. Most articles engaged with this pillar. Common topics included ecological agriculture practices, rejecting intensive-industrial agricult…	The topic of the meta-analysis is out of the scope of this review.	Camille		R
Second search		10.1186/s13750-016-0070-y	Bernes, C; Jonsson, BG; Junninen, K; Lohmus, A; Macdonald, E; Muller, J; Sandstrom, J	2016	What are the impacts of manipulating grazing and browsing by ungulates on plants and invertebrates in temperate and boreal forests? A systematic review protocol	Background: Livestock grazing and 'overabundance' of large wild herbivores in forested areas have long been perceived as conflicting with the aims of both silviculture and forest conservation; however, certain kinds of herbivory can help to maintain habitat values in forest ecosystems. Management of grazing/browsing in protected forests can, therefore, be a critical tool for biodiversity conserva…	The study does not deal with agroforestry systems, according to its definition.	Camille		R
Third search		10.1016/j.rama.2021.01.007	Biggs, NB; Huntsinger, L	2021	Managed Grazing on California Annual Rangelands in the Context of State Climate Policy	Approximately one third of California is grazed by livestock, with most forage produced on annual rangelands, the common term for rangelands with a significant annual herbaceous component. Given the state's interest in mitigating climate change and growing public attention on grazing systems that enhance carbon sequestration, we investigate the impact of grazing management on soil carbon cycling …	The study does not deal with agroforestry systems, according to its definition.	Camille		R
Second search		10.1186/s12862-022-01977-z	Boinot, S; Barkaoui, K; Meziere, D; Lauri, PE; Sarthou, JP; Alignier, A	2022	Research on agroforestry systems and biodiversity conservation: what can we conclude so far and what should we improve?	Through a meta-analysis, Mupepele et al. (BMC Ecol Evol 21:1-193, 2021) assessed the effects of European agroforestry systems on biodiversity, estimated by species richness or species diversity. They showed that the effects of silvoarable and silvopastoral systems depend on the systems they are compared to and the taxa studied. Further, they found that only silvoarable systems increased species r…	The paper is neither a systematic review nor a meta-analysis of primary research.	Camille		R
Second search		10.1002/ppp3.10084	Borrell, JS; Goodwin, M; Blomme, G; Jacobsen, K; Wendawek, AM; Gashu, D; Lulekal, E; Asfaw, Z; Demissew, S; Wilkin, P	2020	Enset-based agricultural systems in Ethiopia: A systematic review of production trends, agronomy, processing and the wider food security applications of a neglected banana relative	Societal Impact Statement Enset is a staple food for over 20 million people via its starch-rich corm and pseudostem, yet it is virtually unknown outside a narrow zone of cultivation in southern Ethiopia. Due to acculturation and urbanization coupled with climate change, emerging pests and the introduction of new crops, the extensive indigenous knowledge associated with this crop is in danger of b…	The topic of the meta-analysis is out of the scope of this review.	Camille		R
Second search		10.3832/ifor3779-014	Bueno, RD; Marchetti, L; Cocozza, C; Marchetti, M; Salbitano, F	2021	Could cattle ranching and soybean cultivation be sustainable? A systematic review and a meta-analysis for the Amazon	Tropical forests are being destroyed to make space for agricultural activities with the assumption that they are required to feed the growing global population. Consequently, more sustainable practices are needed to guarantee food security and environmental protection of highly threatened natural biodiversity hotspots like the Amazon rainforest. Cattle ranching and soybean cultivation are by far …	The study does not deal with agroforestry systems, according to its definition.	Camille		R
Second search		10.26633/RPSP.2019.39	Cardona-Arias, JA; Salas-Zapata, WA; Carmona-Fonseca, J	2019	Social determination and determinants of malaria: a systematic review, 1980-2018	Objective. Describe how the 'social determination of health' approach has been applied in malaria studies around the world. Methods. Systematic review of original studies published from 1980 to 2018. Six search strategies were used in ten multidisciplinary databases, and in libraries and repositories of seven universities in Brazil, Colombia, Ecuador, and Peru. PRISMA guidelines were followed, me…	The topic of the meta-analysis is out of the scope of this review.	Camille		R
Second search		10.17161/eurojecol.v6i1.13824	Castillo-Figueroa D.	2020	Why bats matters: A critical assessment of bat-mediated ecological processes in the neotropics	New World bats play a significant role in ecosystem functioning and are imperative for maintaining environmental services. Nevertheless, human-caused environmental changes are jeopardizing bat communities, which results in the loss of functional roles provided by them. It is important, therefore, to assess ecological processes performed by bats in the Neotropics to define priorities in further re…	The topic of the meta-analysis is out of the scope of this review.	Camille		R
Third search		10.1186/s40100-019-0143-7	Charry, A; Narjes, M; Enciso, K; Peters, M; Burkart, S	2019	Sustainable intensification of beef production in Colombia-Chances for product differentiation and price premiums	To promote the adoption of more sustainable cattle production systems in Colombia (mainly silvopastoral systems with improved forages), some sector stakeholders have proposed the development of differentiated, higher value beef products. However, there have been no rigorous estimations of local market potential and consumer preferences for these hypothetical products yet. On the other hand, while…	The topic of the meta-analysis is out of the scope of this review.	Camille		R
Third search		10.3390/ijerph192416876	Chen D.; Xiong K.; Zhang J.	2022	Progress on the Integrity Protection in the Natural World Heritage Site and Agroforestry Development in the Buffer Zone: An Implications for the World Heritage Karst	In the face of increasing development pressure, how to fulfill the obligations under the World Cultural and Natural Heritage Convention and maintain the integrity of the Natural World Heritage Site (NWHS) is a major problem to be solved at present. Agroforestry (AF) development in the buffer zone maintains the integrity of NWHS and promotes sustainable ecological and economic development in the b…	The topic of the meta-analysis is out of the scope of this review.	Camille		R
Third search		10.3390/su15139992	Chidozie, BC; Ramos, AL; Ferreira, JV; Ferreira, LP	2023	Residual Agroforestry Biomass Supply Chain Simulation Insights and Directions: A Systematic Literature Review	Residual biomass is a reliable source of energy and hence requires effective supply chain management for optimal performance and sustainability. While there are various studies on this recent trend, a comprehensive review of the literature on simulation-based modeling of the supply chain for residual agroforestry biomass is lacking. This study aims to present a systematic review of relevant liter…	The study does not deal with agroforestry systems, according to its definition.	Camille		R
Second search		10.1016/j.tfp.2021.100176	Chizmar, S; Parajuli, R; Frey, GE; Bardon, RE; Branan, RA; MacFarland, K; Smith, M; Ameyaw, L	2022	Challenges and opportunities for agroforestry practitioners to participate in state preferential property tax programs for agriculture and forestry	All 50 states offer preferential property tax programs that lower the taxes paid on enrolled agricultural and/or forest lands. While agroforestry is a land-use that combines elements of both agriculture and forestry, eligibility criteria and other rules and regulations may prevent landowners from enrolling agroforestry practices in one or more of the agricultural and forestry tax programs. This p…	The topic of the meta-analysis is out of the scope of this review.	Camille		R
Second search		10.1016/j.rser.2020.110554	Couto, LC; Campos, LC; da Fonseca-Zang, W; Zang, J; Bleischwitz, R	2021	Water, waste, energy and food nexus in Brazil: Identifying a resource interlinkage research agenda through a systematic review	The resource nexus consists of a framework to address interlinkages between natural resources and systems that provide water, energy, food and waste management. It transcends traditional assessments conducted in silos, raising trade-offs and synergies that are rarely acknowledged. The nexus framework is intrinsically context specific, as each respective region has particularities in terms of crit…	The topic of the meta-analysis is out of the scope of this review.	Camille		R
Second search		10.1007/s10531-020-02093-4	Curveira-Santos G.; Santos M.J.; Santos-Reis M.; Rosalino L.M.	2021	Global patterns of carnivore spatial ecology research in agroecosystems	The growing needs for agricultural expansion and intensification will likely continue to reduce and fragment the terrestrial habitats fundamental to mammalian carnivores. Recent research identified benefits of agroecosystems to carnivores recognizing their multifunctionality, mostly for common species. However, the variability of carnivore ecology investigated in agroecosystems, biases in agricul…	The topic of the meta-analysis is out of the scope of this review.	Camille		R
Second search		10.1016/j.sajb.2022.09.040	Dai, EH; Houndonougbo, JSH; Idohou, R; Assogbadjo, AE; Kakai, RG	2022	Current knowledge and future prospects on the declining Uvaria chamae P. Beauv in sub-Saharan Africa: A global systematic review for its sustainable management	Uvaria chamae P. Beauv is known as a key shrub species providing several goods and services for sustaining livelihoods in Sub-Saharan Africa. Despite its great medicinal importance for local communities, little is known about its conservation status and sustainable management strategies regarding the current overex-ploitation of the species' fruits through traditional agroforestry systems. Here, …	The topic of the meta-analysis is out of the scope of this review.	Camille		R
Second search		10.1016/j.scitotenv.2021.150428	Das, S; Chatterjee, S; Rajbanshi, J	2022	Responses of soil organic carbon to conservation practices including climate-smart agriculture in tropical and subtropical regions: A meta-analysis	Considering the current threatening conditions of climate change, Climate Smart Agriculture (CSA) aims to improve the soil health and its organic carbon stocks by encouraging soil carbon sequestration through conservation practices in agricultural lands. However, the effects of these practices differ due to diverse climatic scenario, soil characteristics and management system. To identify the sui…	The study does not deal with agroforestry systems, according to its definition.	Camille		R
First search		10.1007/s11295-017-1155-7	Dawson, IK; van Breugel, P; Coe, R; Kindt, R; van Zonneveld, M; Lilleso, JPB; Graudal, L; Muchugi, A; Russell, J; Jamnadass, R	2017	A meta-analysis of molecular marker genetic datasets for eastern Africa trees supports the utility of potential natural vegetation maps for planning climate-smart restoration initiatives	Forest and woodland landscape restoration is a key undertaking of renewed interest for forestry and conservation practitioners, but is hampered by the lack of information on the distributions of tree species and of patterns of intra-specific genetic variation. Through the first meta-analysis of its type, we here tested the utility of a high-resolution potential natural vegetation (PNV) map for ea…	The study does not deal with agroforestry systems, according to its definition.			R
fourth search		10.1016/j.jhydrol.2024.130710	Ding, WT; Zvomuya, F; Cao, MY; Wu, YR; Liu, ZP; He, HL	2024	Ground cover management improves orchard soil moisture content: A global meta-analysis	Ground cover management (GCM) is an important practice for sustainable agricultural development, which has been garnering popularity in numerous orchards worldwide. It can effectively improve soil health, reduce soil erosion, and enhance carbon sequestration. However, the effects of GCM on soil moisture content (SMC) dynamics vary with management and environmental factors, and it remains unclear …	The topic of the meta-analysis is out of the scope of this review.	Camille		R
Third search		10.1111/sum.12951	Dlamini, JC; Tesfamariam, EH; Verbeeck, M; Loick, N; Louro-Lopez, A; Hawkins, JMB; Blackwell, MSA; Dunn, RM; Collins, AL; Cardenas, LM	2023	Do NO, N2O, N2 and N2 fluxes differ in soils sourced from cropland and varying riparian buffer vegetation? An incubation study	Riparian buffers are expedient interventions for water quality functions in agricultural landscapes. However, the choice of vegetation and management affects soil microbial communities, which in turn affect nutrient cycling and the production and emission of gases such as nitric oxide (NO), nitrous oxide (N2O), nitrogen gas (N-2) and carbon dioxide (CO2). To investigate the potential fluxes of th…	The paper is neither a systematic review nor a meta-analysis of primary research.	Camille		R
First search		10.1007/s10457-018-0227-5	Dollinger J., Jose S.,	2019	Correction to: Agroforestry for soil health (Agroforestry Systems, (2018), 92, 2, (213-219), 10.1007/s10457-018-0223-9),	Stefano and Jacobson in the following text ‘‘With the aim of deriving general trends of SOC storage changes between agroforestry systems, agricultural systems and forests, Stefano and Jacobson (2018) performed a meta-analysis on the currently available literature.’’ under the section ‘‘Agroforestry enhances soil organic carbon’’ should be read as De Stefano and Jacobson (2018). The proper citatio…			No	R
Third search		10.1007/s10457-023-00906-3	Dupraz, C	2023	Assessment of the ground coverage ratio of agrivoltaic systems as a proxy for potential crop productivity	The yield of crops in both agrivoltaic (AV) and agroforestry (AF) systems is difficult to predict. The shade pattern of an AV system is not typical and is quite different from the one of AF systems. Most countries allow AV systems on croplands only if the crop productivity is maintained (e.g., in France) or slightly reduced, as in Japan and Germany, with 80% and 66% minimum relative yield (RY) re…	The paper is neither a systematic review nor a meta-analysis of primary research.	Camille		R
fourth search		10.1080/10106049.2023.2297555	Escobar-López, A; Castillo-Santiago, MA; Mas, JF; Hernández-Stefanoni, JL; López-Martínez, JO	2024	Identification of coffee agroforestry systems using remote sensing data: a review of methods and sensor data	Coffee is one of the most important agricultural commodities. Agroforestry systems (AFS) are increasingly used in coffee cultivation because of environmental benefits, adaptability of the systems, and economic profits. However, identifying the spatial distribution of AFS through remote sensing continues to be challenging. The current systematic review focuses on the accuracies obtained and the co…	The topic of the meta-analysis is out of the scope of this review.	Camille		R
Second search		10.1016/j.biocontrol.2019.05.011	Escobar-Ramirez, S; Grass, I; Armbrecht, I; Tscharntke, T	2019	Biological control of the coffee berry borer: Main natural enemies, control success, and landscape influence	Coffee is one of the most important commodities globally and the Coffee Berry Borer (CBB) is its main pest, causing losses of more than half a billion dollars annually. In this systematic review, we quantify the available evidence of successful biological control in coffee agroforestry. There is a recent research trend of switching from the traditional focus on classical biological control to con…	The topic of the meta-analysis is out of the scope of this review.	Camille		R
Third search		10.16418/j.issn.1000-3045.20201008001-en	Fan J.; Zhou K.; Wu J.	2020	Typical Study on Sustainable Development in Relative Poverty Areas and Policy Outlook of China	Based on the systematic review of the research progress on China's relative poverty, this study discussed the distribution characteristics of the relative poverty areas (RPAs), the basis of regional function types, and proposed the policy recommendations. There are three main periods concerning sustainable development research on RPAs: (1) The concept of "relative poverty" was adopted for the fir…	The topic of the meta-analysis is out of the scope of this review.	Camille		R
fourth search		10.1007/s10457-023-00927-y	Farinaccio, FM; Ceccon, E; Perez, DR	2024	Could agroforestry restore ecosystem services in arid lands? An analysis through the weight of the evidence approach	Degradation is limiting the ability of arid lands to provide ecosystem services. Agroforestry Systems can supply several of these ecosystem services. In this context, we carried out a systematic review of literature, to find the ecosystem services provided by Agroforestry Systems in arid lands irrigated by rainwater harvesting systems in worldwide. The ecosystem services most mentioned (soil qual…	The paper is neither a systematic review nor a meta-analysis of primary research.	Camille		R
Third search		10.1080/21683565.2023.2270449	Flor-Vélez, JR; Montes-Escobar, K; Corzo-Bacallao, J; Garcés-Fiallos, FR; Salas-Macías, CA	2023	Exploring the relationship between tree diversity and carbon storage in aboveground biomass of coffee agroforestry systems in southern Manabí, Ecuador	The study was conducted at three sampling sites in the province of Manabi, Ecuador, designated for coffee production under an agroforestry system (AFS). A total of 21 plant species were recorded, and the carbon stored in live aboveground biomass was estimated. The results showed that coffee-based AFS has a high potential for carbon storage, and species diversity is related to the structural param…	The paper is neither a systematic review nor a meta-analysis of primary research.	Camille		R
Third search		10.1007/s10457-017-0124-3	Fornara, DA; Olave, R; Burgess, P; Delmer, A; Upson, M; McAdam, J	2018	Land use change and soil carbon pools: evidence from a long-term silvopastoral experiment	Multi-functional silvopastoral systems provide a wide range of services to human society including the regulation of nutrients and water in soils and the sequestration of atmospheric carbon dioxide (CO2). Although silvopastoral systems significantly contribute to enhance aboveground carbon (C) sequestration (e.g. C accumulation in woody plant biomass), their long-term effects on soil C pools are …	The paper is neither a systematic review nor a meta-analysis of primary research.	Camille		R
Third search		10.4081/ija.2023.2185	Frongia, A; Pulina, A; Tanda, A; Seddaiu, G; Roggero, PP; Moreno, G	2023	Assessing the effect of rotational grazing adoption in Iberian silvopas-toral systems with Normalized Difference Vegetation Index time series	Adaptive multi-paddock (AMP) is a grazing system that combines intensive, rapid grazing livestock rotation with relatively short grazing periods and a long recovery time after grazing. The study assesses, under Mediterranean silvopastoral systems, changes in pasture phenology and spatial variability after adopting the AMP under contrasting land cover (wooded grassland versus grassland) with a rem…	The paper is neither a systematic review nor a meta-analysis of primary research.	Camille		R
Third search		10.1088/1748-9326/acbc38	Gómez, AM; Parra, A; Pavelsky, TM; Wise, E; Villegas, JC; Meijide, A	2023	Ecohydrological impacts of oil palm expansion: a systematic review	Global demand for vegetable oil and high oil palm yield have driven the rapid expansion of oil palm plantations in tropical countries. The research literature widely recognizes the effects of forest cover conversion into oil palm on biodiversity, deforestation, and carbon dynamics. However, research on the ecohydrological impacts of oil palm plantations is sparse, despite studies indicating that …	The study does not deal with agroforestry systems, according to its definition.	Camille		R
Second search		10.3390/agronomy11122474	Gross, A; Bromm, T; Glaser, B	2021	Soil Organic Carbon Sequestration after Biochar Application: A Global Meta-Analysis	Biochar application to soil has the potential to sequester carbon in the long term because of its high stability and large-scale production potential. However, biochar technologies are still relatively new, and the global factors affecting the long-term fate of biochar in the environment are still poorly understood. To fill this important research gap, a global meta-analysis was conducted includi…	The study does not deal with agroforestry systems, according to its definition.	Camille		R
Second search		10.3390/su12083276	Guo, Q; Ola, O; Benjamin, EO	2020	Determinants of the Adoption of Sustainable Intensification in Southern African Farming Systems: A Meta-Analysis	Climate change and environmental degradation are major threats to sustainable agricultural development in Southern Africa. Thus, the concept of sustainable intensification (SI) has become an important topic among researchers and policymakers in the region over the last three decades. SI involves getting more output from less input using practices such as agroforestry, organic fertilizer, sustaina…	The topic of the meta-analysis is out of the scope of this review.	Camille		R
Second search		10.1051/e3sconf/202130602022	Harsanto B.	2021	Sustainability innovation in the agriculture sector in Indonesia: a review	Indonesia as one of the world’s important players in agriculture has great sustainability and innovation challenges. This paper aims to explore the practice of sustainability innovation or sustainability-oriented innovation (SOI) in the agricultural sector in Indonesia. The method used is structured search and analysis, known as a systematic review of scientific articles in the international acad…	The topic of the meta-analysis is out of the scope of this review.	Camille		R
Second search		10.1016/j.forpol.2021.102460	Hintz, KS; Kimengsi, JN; Pretzsch, J	2021	How do smallholder forest farmers' organizations manage and commercialize wood products?-A global systematic review	Collective action approaches in the commercialization of wood forest products from smallholders in a rural setting are not fully investigated and understood. This implies the necessity to gain a better understanding on the state of forest farmers' organizations (FFOs), with a view to identifying current and future research issues to be addressed. This systematic review, thus, aims to provide a kn…	The topic of the meta-analysis is out of the scope of this review.	Camille		R
Second search		10.1007/s10722-020-00892-w	Houndonougbo, JSH; Kassa, B; Mensah, S; Salako, VK; Kakai, RG; Assogbadjo, AE	2020	A global systematic review on conservation nd domestication of Parkia biglobosa (Jacq.) R. Br. ex G. Don, an indigenous fruit tree species in Sub-Sahara African traditional parklands: current knowledge and future directions	Parkia biglobosa (Jacq.) R. Br. ex G. Don is one of the most common traditional parkland tree species that generates vital non-timber forest products and benefits for local people in Sub-Saharan Africa. Despite its socio-economic importance and value for local and regional economies, the species has remained at infant stage of domestication, yet declining in the nature. While several studies addr…	The topic of the meta-analysis is out of the scope of this review.	Camille		R
fourth search		10.3390/f15030502	Huang, YT; Xiong, KN; Xiao, J	2024	To Achieve a Win-Win Situation: Reorganizing and Enhancing Agroforestry Ecosystem Assets and Productivity to Inform Karst Desertification Control	The ongoing degradation of fragile ecosystems increasingly diminishes the availability of natural resources. Consequently, the conservation and utilization of ecosystem assets have emerged as a focal point of global research. This study focuses on integrating agroforestry ecosystem assets (AEA) with their capacity to provide ecosystem services, aiming to explore their interconnections and enhance…	The topic of the meta-analysis is out of the scope of this review.	Camille		R
Third search		10.12767/buel.v100i2.438	Hubner, V; Böhm, C; Eysel-Zahl, G; Kudlich, W; Kursten, E; Lamersdorf, N; Meixner, CA; Morhart, C; Peschel, T; Tsonkova, P; Wiesmeier, M	2022	Carbon certification trough agroforestry?! Potential, accounting and recommendations	Agroforestry has long been appreciated for having a great potential for increasing and, above all, permanently storing carbon in the biomass and the soil. The Intergovernmental Panel on Climate Change (IPCC), the German Advisory Council on Global Change (WBGU), the European Commission and Parliament recognise agroforestry as a very suitable option in the fight against the climate crisis and in ad…	The paper is not written in English.	Camille		R
Second search		10.3390/rs12122041	Hunt, DA; Tabor, K; Hewson, JH; Wood, MA; Reymondin, L; Koenig, K; Schmitt-Harsh, M; Follett, F	2020	Review of Remote Sensing Methods to Map Coffee Production Systems	The coffee sector is working towards sector-wide commitments for sustainable production. Yet, knowledge of where coffee is cultivated and its environmental impact remains limited, in part due to the challenges of mapping coffee using satellite remote sensing. We recognize the urgency to capitalize on recent technological advances to improve remote sensing methods and generate more accurate, relia…	The topic of the meta-analysis is out of the scope of this review.	Camille		R
fourth search		10.1111/1365-2664.14652	Isaac, ME; Gagliardi, S; Ordonez, JC; Sauvadet, M	2024	Shade tree trait diversity and functions in agroforestry systems: A review of which traits matter	Shade trees in agroforestry systems confer ecosystem services, such as enhanced soil fertility from diverse litter inputs, microclimate regulation via shade, and disease mitigation through trophic and abiotic interactions. With this thriving role of agroforestry in sustainable agriculture, particularly for tree crops, systematic and reliable methods to select shade trees for specific agroecosyste…	The topic of the meta-analysis is out of the scope of this review.	Camille		R
First search		10.1038/s41597-020-0356-3	Jian, JS; Du, X; Stewart, RD	2020	A database for global soil health assessment	Field studies have been performed for decades to analyze effects of different management practices on agricultural soils and crop yields, but these data have never been combined together in a way that can inform current and future cropland management. Here, we collected, extracted, and integrated a database of soil health measurements conducted in the field from sites across the globe. The databa…			Andrea	R
Second search		10.1016/j.worlddev.2022.106014	Kandel, M; Anghileri, D; Alare, RS; Lovett, PN; Agaba, G; Addoah, T; Schreckenberg, K	2022	Farmers? perspectives and context are key for the success and sustainability of farmer-managed natural regeneration (FMNR) in northeastern Ghana	Restoring degraded landscapes is critical for achieving global environmental and development goals, and agroforestry is increasingly promoted as a nature-based solution to land degradation. Farmer-managed natural regeneration (FMNR) is an agroforestry-based approach for restoring degraded agricultural land and it has been widely implemented in African drylands. However, a recent systematic review…	The topic of the meta-analysis is out of the scope of this review.	Camille		R
Third search		10.5871/jba/009s10.007	Katic P.	2021	Climate change governance in agroforestry systems: a systematic review	Agroforestry has the potential to fundamentally transform socio-ecological systems to address the root causes of climate vulnerability. Although there is increasing interest in agroforestry as a transformative adaptation strategy, its implementation is often discouraged by the need to involve multiple stakeholders, sectors, and governance levels with potentially different interests. We draw on a …	The topic of the meta-analysis is out of the scope of this review.	Camille		R
Third search		10.1016/j.dib.2023.109560	Koutouleas, A; Blunt, C; Bregar, A; Hansen, JK; Raebild, A; Etienne, H; Georget, F	2023	Plant agronomy, leaf ecophysiology, yield and quality data of interspecific grafted Coffea arabica across an elevation gradient	In-field data were collected in Costa Rica between 2018- 2021 on newly planted grafted and non-grafted coffee plants grown under artificial shade nets and across an elevation gradient (1050, 1250 and 1450 m.a.s.l). The coffee plants consisted of Coffea arabica F1 hybrid plants ('H3 i.e. Caturra cv. X Ethiopian 531'), which were derived from a somatic embryogenesis clonal propagation process, an A…	The study does not deal with agroforestry systems, according to its definition.	Camille		R
fourth search		10.1007/s10457-024-00957-0	Kumar, BM; Kunhamu, TK; Bhardwaj, A; Santhoshkumar, AV	2024	Subcanopy light availability, crop yields, and managerial implications: a systematic review of the shaded cropping systems in the tropics	Agroforestry systems (AFS) represent combinations of trees, arable crops, and/or pastures. Being assemblages of diverse life-forms, they exhibit complex biophysical interactions. For instance, the multistrata canopies shade the understory crops by intercepting a significant amount of the incoming solar radiation. Optimizing understory productivity, thus, requires understanding the elements that a…	The topic of the meta-analysis is out of the scope of this review.	Camille		R
fourth search		10.1007/s13412-024-00888-3	Legide, YY; Feyissa, GS; Karo, TM	2024	Revitalizing indigenous practices employed by farmers to reduce agriculture's vulnerability to climate change: a systematic review	The purpose of this literature review is to rejuvenate the traditional climate change adaptation strategies employed by smallholder farmers in Sub-Saharan Africa. The study adopts a systematic approach, analyzing 77 relevant articles published in English between 2000 and 2022. The findings highlight the detrimental impact of climate change on African agriculture, which serves as the backbone of t…	The topic of the meta-analysis is out of the scope of this review.	Camille		R
Third search		10.1177/00307270231199796	Lennée, J	2023	Current agricultural diversification strategies are already agroecological	Modern agriculture, especially monocultures, is increasingly blamed by proponents of agroecology for loss of biodiversity in agroecosystems through loss of natural vegetation and crop genetic diversity. However, loss of natural vegetation to agriculture has slowed in recent years, and the claim for 75% loss of crop genetic diversity due to the widespread use of improved crop varieties lacks evide…	The paper is neither a systematic review nor a meta-analysis of primary research.	Camille		R
Third search		10.11766/trxb202109290532	Li Y.; Zhang J.; Jia J.; Fan F.; Zhang F.; Zhang J.	2022	Research Progresses on Farmland Soil Ecosystem Multifunctionality; [农田土壤生态系统多功能性研究进展]	Building healthy soil is a prerequisite for the improvement of cultivated land productivity. It is fundamental for meeting the challenges of food security and environmental protection as well as realizing the agricultural green development and a community of shared future. The core of building healthy soil is to realize the soil ecosystem multifunctionality. In the new era of ecological civilizat…	The paper is not written in English.	Camille		R
Third search		10.1016/j.eja.2016.11.003	Lin, HC; Hülsbergen, KJ	2017	A new method for analyzing agricultural land-use efficiency, and its application in organic and conventional farming systems in southern Germany	Improving the land-use efficiency (LUE) of farming systems could satisfy increasing global food, feed, biomass and bioenergy demand in a sustainable manner. This study presents a new method for calculating LUE, beginning with an overview of different approaches to assessing agricultural LUE. This new method takes into account the quality and function of agricultural products and the relationship …	The topic of the meta-analysis is out of the scope of this review.	Camille		R
Second search		10.3390/hydrology7040076	Lin, MM; Sadeghi, SMM; Van Stan, JT	2020	Partitioning of Rainfall and Sprinkler-Irrigation by Crop Canopies: A Global Review and Evaluation of Available Research	The role of crop canopies in the global water cycle is a topic of increasing international interest. How much rain and sprinkler-irrigation water are returned to the atmosphere or reach the soils beneath crop canopies, and the pathways of those water inputs at the soil, are linked to agricultural productivity and sustainability. This concise-format review synthesized and evaluated the available, …	The topic of the meta-analysis is out of the scope of this review.	Camille		R
Third search		10.1007/s10457-023-00858-8	Lovell, ST; Krishnaswamy, K; Lin, CH; Meier, N; Revord, RS; Thomas, AL	2023	Nuts and berries from agroforestry systems in temperate regions can form the foundation for a healthier human diet and improved outcomes from diet-related diseases	Agroforestry is a specific type of agroecosystem that includes trees and shrubs with the potential to yield nutrient-rich products that contribute to human health. This paper reviews the literature on the human health benefits of tree nut and berry species commonly associated with agroforestry systems of the United States, considering their potential for preventing certain diet-related diseases. …	The topic of the meta-analysis is out of the scope of this review.	Camille		R
Second search		10.1111/brv.12211	Maas, B; Karp, DS; Bumrungsri, S; Darras, K; Gonthier, D; Huang, JCC; Lindell, CA; Maine, JJ; Mestre, L; Michel, NL; Morrison, EB; Perfecto, I; Philpott, SM; Sekerciogiu, CH; Silva, RM; Taylor, PJ; Tscharntke, T; Van Bael, SA; Whelan, CJ; Williams-Guillen, K	2016	Bird and bat predation services in tropical forests and agroforestry landscapes	Understanding distribution patterns and multitrophic interactions is critical for managing bat- and bird-mediated ecosystem senzices such as the suppression of pest and non-pest arthropods. Despite the ecological and economic importance of bats and birds in tropical forests, a.grotbrestry systems, and agricultural systems mixed with natural forest, a systematic review of their impact is still mis…	The topic of the meta-analysis is out of the scope of this review.	Camille		R
fourth search		10.1080/00288233.2023.2298922	Mackay-Smith, TH; Spiekermann, RI; Richards, DR; Harcourt, N; Burkitt, LL	2024	An integrative approach to silvopastoral system design: perspectives, potentials and principles	Silvopastoral systems have complex impacts on a diverse range of outcomes, making it essential to design these systems using an integrative approach to maximise positive impacts to farms. This paper comprises firstly a systematic review of global silvopastoral processes, and secondly stakeholder-driven synthesis of key opportunities and challenges for future silvopastoralism situated in the conte…	The topic of the meta-analysis is out of the scope of this review.	Camille		R
Second search		10.1111/aje.12935	Makwinja, R; Mengistou, S; Kaunda, E; Alamirew, T	2022	Economic value of tropical inland freshwater shallow lakes: Lesson from Lake Malombe, Malawi	Freshwater lakes provide critical ecosystem services (ESs) to local and global communities. However, many of these lakes are under serious threat from degradation, over-exploitation and pollution instigated by unsustainable use and a lack of practical management approaches. Under such conditions, it is critical to quantify the ESs of these lakes and uncover factors affecting local population part…	The topic of the meta-analysis is out of the scope of this review.	Camille		R
Second search		10.3390/f9090551	Malandra, F; Vitali, A; Urbinati, C; Garbarino, M	2018	70 Years of Land Use/Land Cover Changes in the Apennines (Italy): A Meta-Analysis	Land use science usually adopts a case study approach to investigate landscape change processes, so we considered a meta-analysis an appropriate tool for summarizing general patterns and heterogeneous findings across multiple case studies over a large geographic area. Mountain landscapes in the Apennines (Italy) have undergone significant variations in the last century due to regional and nationa…	The study does not deal with agroforestry systems, according to its definition.	Camille		R
Second search		10.3390/land11081167	Malapane, OL; Musakwa, W; Chanza, N; Radinger-Peer, V	2022	Bibliometric Analysis and Systematic Review of Indigenous Knowledge from a Comparative African Perspective: 1990-2020	Globally, indigenous knowledge (IK) has been shown to be a critical factor in economic growth and sustainable development and is as important as scientific knowledge. However, when it comes to the African narrative, IK research still seems to fall short, even with the great recognition and interest it is attracting. IK has always been underprivileged and marginalized, treated as an unsubstantiate…	The topic of the meta-analysis is out of the scope of this review.	Camille		R
Second search		10.1111/geb.13522	Mallen-Cooper, M; Atkinson, J; Xirocostas, ZA; Wijas, B; Chiarenza, GM; Dadzie, FA; Eldridge, DJ	2022	Global synthesis reveals strong multifaceted effects of eucalypts on soils	Aim Eucalypts have a widespread global distribution owing to their popularity for agroforestry and as environmental plantings. Despite an abundance of site-specific evidence that eucalypts modify soils and soil processes, we lack a quantitative synthesis of their overall effects at the global scale. This limits our capacity to assess the likely impacts of future introductions in any given region …	The topic of the meta-analysis is out of the scope of this review.	Camille		R
Third search		10.3390/f9080476	Måren, IE; Sharma, LN	2018	Managing Biodiversity: Impacts of Legal Protection in Mountain Forests of the Himalayas	Legal protection has been used as means of conserving forests and associated biodiversity in many regions of the world since the eighteenth century. However, most forests in the global south, even those within protected areas, are influenced by human activities. Himalayan forests harbour much of the biodiversity of the region, maintain subsistence livelihoods, and provide regional and global ecos…	The topic of the meta-analysis is out of the scope of this review.	Camille		R
Second search		10.1111/conl.12740	Martin, DA; Osen, K; Grass, I; Holscher, D; Tscharntke, T; Wurz, A; Kreft, H	2020	Land-use history determines ecosystem services and conservation value in tropical agroforestry	Agroforestry is widely promoted as a potential solution to address multiple UN Sustainable Development Goals, including Zero Hunger, Responsible Consumption and Production, Climate Action, and Life on Land. Nonetheless, agroforests in the tropics often result from direct forest conversions, displacing rapidly vanishing and highly biodiverse forests with large carbon stocks, causing undesirable tr…	The topic of the meta-analysis is out of the scope of this review.	Camille		R
Second search		10.1111/cobi.13920	Martin, DA; Raveloaritiana, E	2022	Using land-use history and multiple baselines to determine bird responses to cocoa agroforestry	Climate change is expected to adversely affect the crop yields and food security for many smallholder farmers in the tropics unless adaptive measures are implemented. Agroforestry ecosystem services, such as micro-climate buffering, have received growing attention from the academic and policy communities for alleviating the negative impacts of climate change on smallholders. These benefits imply …	The topic of the meta-analysis is out of the scope of this review.	Camille		R
Third search		10.1016/j.jaridenv.2023.105052	Medeiros, AD; Cesário, FV; Maia, SMF	2023	Long-term impact of conventional management on soil carbon and nitrogen stocks in the semi-arid region of Brazil: A meta-analysis	The conversion of native vegetation to agricultural systems has impacted soil carbon and nitrogen stocks in tropical regions, with their maintenance, increase and losss depending on several factors, such as climate, cultivation time, management, depth and classe of soil. Our aim, therefore, was to evaluate the impact of con-verting areas under Caatinga vegetation to conventional agricultural syst…	The study does not deal with agroforestry systems, according to its definition.	Camille		R
fourth search		10.1016/j.geodrs.2024.e00757	Minarsch, EML; Schierning, P; Wichern, F; Gattinger, A; Weckenbrock, P	2024	Transect sampling for soil organic carbon monitoring in temperate alley cropping systems - A review and standardized guideline	Agroforestry systems provide significant ecosystem services, including soil organic carbon sequestration. However, the structural complexity of these systems must be considered when taking samples. In particular, when sampling in the treeand arable- or grassland strips of alley cropping systems (ACS), different levels of tree influence must be taken into account. The heterogeneity of soil samplin…	The topic of the meta-analysis is out of the scope of this review.	Camille		R
Second search		10.3390/su10124504	Mondal, PP; Zhang, YL	2018	Research Progress on Changes in Land Use and Land Cover in the Western Himalayas (India) and Effects on Ecosystem Services	Western Himalaya is an important region in terms of its enriched biodiversity and immense ecosystem services (ESS). However, its biodiversity and ESS are under tremendous pressure from rapid population growth, developmental activities, unplanned urbanization, agricultural expansion, climate change, and the associated changes in land use and land cover (LULC). This study provides a systematic revi…	The topic of the meta-analysis is out of the scope of this review.	Camille		R
Third search		10.1016/j.agee.2007.04.006	Moreno, G	2008	Response of understorey forage to multiple tree effects in Iberian dehesas	The relative importance of tree effects (shade and changes in soil water and nutrients) on understorey forage production is analysed in three open oak woodlands of Central-Western Spain with different rainfall regimes: 452, 547 and 651 L m(-2) of mean annual rainfall. Pasture production was measured in three different zones: under canopy shade, under artificial shade and on the open grassland in …	The paper is neither a systematic review nor a meta-analysis of primary research.	Camille		R
Second search		10.1016/j.jenvman.2020.111736	Mukhopadhyay R.; Sarkar B.; Jat H.S.; Sharma P.C.; Bolan N.S.	2021	Soil salinity under climate change: Challenges for sustainable agriculture and food security	Soil salinity is one of the major and widespread challenges in the recent era that hinders global food security and environmental sustainability. Worsening the situation, the harmful impacts of climate change accelerate the development of soil salinity, potentially spreading the problem in the near future to currently unaffected regions. This paper aims to synthesise information from published li…	The topic of the meta-analysis is out of the scope of this review.	Camille		R
Second search		10.1186/s12862-022-02016-7	Mupepele, AC; Dormann, CF	2022	Reply to: Research on agroforestry systems and biodiversity conservation: what can we conclude so far and what should we improve? by Boinot et al. 2022	In our article 'European agroforestry has no unequivocal effect on biodiversity: a time-cumulative meta-analysis' (BMC Ecology and Evolution, 2021) we synthesize the effect of agroforestry on biodiversity. Boinot et al. (BMC Ecology and Evolution, 2022) criticise our approach arguing that our definitions of agroforestry and biodiversity are too narrow; that we use inappropriate control sites for …	The paper is neither a systematic review nor a meta-analysis of primary research.	Camille		R
Second search		10.1098/rspb.2018.1842	Nell, CS; Abdala-Roberts, L; Parra-Tabla, V; Mooney, KA	2018	Tropical tree diversity mediates foraging and predatory effects of insectivorous birds	Biodiversity affects the structure of ecological communities, but little is known about the interactive effects of diversity across multiple trophic levels. We used a large-scale forest diversity experiment to investigate the effects of tropical tree species richness on insectivorous birds, and the subsequent indirect effect on predation rates by birds. Diverse plots (four tree species) had highe…	The topic of the meta-analysis is out of the scope of this review.	Camille		R
Second search		10.1177/0030727019879453	Olum, S; Gellynck, X; Juvinal, J; Ongeng, D; De Steur, H	2020	Farmers' adoption of agricultural innovations: A systematic review on willingness to pay studies	Unlike most studies that focused on specific innovations, this study systematically analyzed farmers' adoption of agricultural innovations in general. It reports willingness to pay (WTP; willingness to accept (WTA)) as a proxy for adoption, its determinants, applied methods, and statistical models. After searching and screening, 80 studies qualified for review. Majority (n= 30) of studies focused…	The topic of the meta-analysis is out of the scope of this review.	Camille		R
Third search		10.1007/s00267-023-01808-x	Owusu, R; Kimengsi, JN; Giessen, L	2023	Outcomes of Forest Landscape Restoration Shaped by Endogenous or Exogenous Actors and Institutions? A Systematic Review on Sub-Saharan Africa	Although ambitious, forest landscape restoration (FLR) is still very high on global climate change mitigation and adaptation research and policy agendas. The scientific literature highlights the importance of institutions and actors' collaboration for achieving the intended outcomes. Despite these diffuse indications, a comprehensive understanding of the role played by different types of actors a…	The study does not deal with agroforestry systems, according to its definition.	Camille		R
Second search		10.3390/agronomy10121969	Padbhushan, R; Sharma, S; Rana, DS; Kumar, U; Kohli, A; Kumar, R	2020	Delineate Soil Characteristics and Carbon Pools in Grassland Compared to Native Forestland of India: A Meta-Analysis	Grassland is a highly dynamic land use system and it provides vital ecosystem services, mainly consisting of carbon storage in the tropics and subtropics. The objective of this study was to delineate grassland in India according to soil characteristics and carbon pools in comparison to native forestland, and to discuss management strategies for improving soil carbon (SC) storage in grassland. A t…	The study does not deal with agroforestry systems, according to its definition.	Camille		R
Second search		10.3390/app12094623	Panoutsou, C; Giarola, S; Ibrahim, D; Verzandvoort, S; Elbersen, B; Sandford, C; Malins, C; Politi, M; Vourliotakis, G; Zita, VE; Vasary, V; Alexopoulou, E; Salimbeni, A; Chiaramonti, D	2022	Opportunities for Low Indirect Land Use Biomass for Biofuels in Europe	Sustainable biofuels are an important tool for the decarbonisation of transport. This is especially true in aviation, maritime, and heavy-duty sectors with limited short-term alternatives. Their use by conventional transport fleets requires few changes to the existing infrastructure and engines, and thus their integration can be smooth and relatively rapid. Provision of feedstock should comply wi…	The study does not deal with agroforestry systems, according to its definition.	Camille		R
Second search		10.3389/fmicb.2022.962619	Pathak V.M.; Verma V.K.; Rawat B.S.; Kaur B.; Babu N.; Sharma A.; Dewali S.; Yadav M.; Kumari R.; Singh S.; Mohapatra A.; Pandey V.; Rana N.; Cunill J.M.	2022	Current status of pesticide effects on environment, human health and it’s eco-friendly management as bioremediation: A comprehensive review	Pesticides are either natural or chemically synthesized compounds that are used to control a variety of pests. These chemical compounds are used in a variety of sectors like food, forestry, agriculture and aquaculture. Pesticides shows their toxicity into the living systems. The World Health Organization (WHO) categorizes them based on their detrimental effects, emphasizing the relevance of publi…	The topic of the meta-analysis is out of the scope of this review.	Camille		R
Third search		10.1016/j.ecolind.2023.111162	Paula A.; Figueiredo A.; Pulido F.; Castro P.	2023	Could spaceborne multispectral data be used as SMART proxies’ indicators for agroforestry ecosystem services? – A systematic review	Agroforestry (AF) is a relevant socio-ecological system in Mediterranean countries that plays a remarkable role in providing ecosystem services (ES). However, AF ecosystems have been declining (e.g. due to land abandonment), compromising the provision of some ES, such as fire regulating services. As a result, Portugal has introduced new legislation to promote fire-smart landscapes through reconve…	The topic of the meta-analysis is out of the scope of this review.	Camille		R
Second search		10.29265/gypp.v31i2.1259	Perevochtchikova, M; Lenero, LOA; Flores-Diaz, AC; Gonzalez, R; Agraz, DL	2022	What Do We Know about Participatory Monitoring in Mexico? Conceptual Proposal from Socioecosystemic Focus and Systematic Scientific Literature Review	This paper presents a systematic review of the scientific literature on participatory monitoring (pm) in Mexico in order to understand its dimensions and usefulness for decision-making and public environmental policies. For this, a conceptual scheme of the mp is proposed from the socioecosystemic perspective (sepm) in accordance with interdisciplinary scientific approaches and citizen science, th…	The topic of the meta-analysis is out of the scope of this review.	Camille		R
Second search		10.1007/s10584-019-02538-y	Pham, Y; Reardon-Smith, K; Mushtaq, S; Cockfield, G	2019	The impact of climate change and variability on coffee production: a systematic review	Coffee is one of the most important globally traded commodities and substantially contributes to the livelihoods of millions of smallholders worldwide. As a climate-sensitive perennial crop, coffee is likely to be highly susceptible to changes in climate. Using a systematic approach, we explore evidence from the published academic literature of the influence of climate change and variability, spe…	The topic of the meta-analysis is out of the scope of this review.	Camille		R
First search		10.1371/journal.pone.0098355	Plieninger, T; Hui, C; Gaertner, M; Huntsinger, L	2014	The Impact of Land Abandonment on Species Richness and Abundance in the Mediterranean Basin: A Meta-Analysis	Land abandonment is common in the Mediterranean Basin, a global biodiversity hotspot, but little is known about its impacts on biodiversity. To upscale existing case-study insights to the Pan-Mediterranean level, we conducted a meta-analysis of the effects of land abandonment on plant and animal species richness and abundance in agroforestry, arable land, pastures, and permanent crops of the Medi…				R
Second search		10.3389/ffgc.2022.1032442	Rahman, MHU; Ahrends, HE; Raza, A; Gaiser, T	2023	Current approaches for modeling ecosystem services and biodiversity in agroforestry systems: Challenges and ways forward	There is extensive scientific evidence that both adaptation and mitigation are essential to address the problem of climate change. However, there is still limited knowledge about the possibilities for exploiting the interrelationships between these measures in the design and implementation of climate change activities. In this paper, first the adaptation-mitigation dichotomy and definitions of ad…	The paper is neither a systematic review nor a meta-analysis of primary research.	Andrea		R
Third search		10.1016/j.jclepro.2023.138170	Reyes-Palomo, C; Aguilera, E; Llorente, M; Díaz-Gaona, C; Moreno, G; Rodríguez-Estévez, V	2023	Free-range acorn feeding results in negative carbon footprint of Iberian pig production in the dehesa agro-forestry system	Iberian pig production has its own quality regulation, which defines different handling and feeding systems for this breed. These differences influence production costs, market price and environmental impact. The most extensive system of fattening Iberian pigs is based on foraging acorns in a silvopastoral system named dehesa, and consumers usually associate the Iberian pork with this system, alt…	The topic of the meta-analysis is out of the scope of this review.	Camille		R
Third search		10.1007/978-3-031-38165-2_102	Rijal P.; Carvalho H.; Matias J.; Garrido S.; Pimentel C.	2024	Drivers and Barriers of Residual Agroforestry Biomass Valorization: A Bibliometric Analysis	Residual agroforestry biomass, a byproduct of agricultural and forestry practices, can be used as feedstock in various industries, including bioenergy, pharmaceuticals, and cosmetics. In addition to its potential to contribute to the bio-circular economy, it can also help to reduce fuel loads in forests and mitigate the risk of forest fires. This study conducts a bibliometric analysis to identify…	The paper is neither a systematic review nor a meta-analysis of primary research.	Camille		R
Second search		10.3389/fevo.2022.999488	Rivera, JD; Favila, ME	2022	Good news! Sampling intensity needed for accurate assessments of dung beetle diversity may be lower in the Neotropics	Ecological studies with Scarabaeinae dung beetles have increased exponentially over the past 30 years, using lethal pitfall traps baited with mammal feces or carrion as the preferred sampling method. Different studies have determined the distance between pitfall traps for effective sampling, but the number of traps is often subjective, leading to excessive or poor sampling. This study provides qu…	The study does not deal with agroforestry systems, according to its definition.	Camille		R
fourth search		10.1039/d3en00623a	Rocha, V; Lago, A; Silva, B; Barros, O; Neves, IC; Tavares, T	2024	Immobilization of biogenic metal nanoparticles on sustainable materials - green approach applied to wastewater treatment: a systematic review	The application of the principles of green chemistry to the synthesis of metal nanoparticles (MNP) is a new emerging issue concerning sustainability. Together with the green nanotechnology, this is an evolving approach with innovative, reliable and sustainable solutions for applications in all fields of life. Those principles may be used on greener bio-inspired materials applied for the synthesis…	The topic of the meta-analysis is out of the scope of this review.	Camille		R
Third search		10.1016/j.jenvman.2023.119180	Rogers E.R.; Zalesny R.S., Jr.; Lin C.-H.; Vinhal R.A.	2023	Intrinsic and extrinsic factors influencing Populus water use: A literature review	Poplars (Populus L. spp.) are versatile, productive trees that are used in environmental systems worldwide to provide a variety of benefits. Though poplars are recognized for their elevated water use, summaries of existing data on poplar water use, its influencing factors, and the methodologies used to measure it, are lacking. We sought to 1) summarize the sap flow methodologies used to quantify …	The topic of the meta-analysis is out of the scope of this review.	Camille		R
First search	Kothke	10.1016/j.ecolecon.2019.03.002	Rosa-Schleich, J; Loos, J; Musshoff, O; Tscharntke, T	2019	Ecological-economic trade-offs of Diversified Farming Systems - A review	Diversified Farming (DF) Systems aim to integrate ecological and economic benefits for sustainable agriculture. DF systems can enhance ecological benefits at the farm level and therewith reduce negative environmental externalities. However, diversification may cause economic costs for the fanner. Although considering ecological-economic trade-offs is crucial for integrating biodiversity into agri…				R
Second search		10.3389/fsufs.2021.709401	Sachet, E; Mertz, O; Le Coq, JF; Cruz-Garcia, GS; Francesconi, W; Bonin, M; Quintero, M	2021	Agroecological Transitions: A Systematic Review of Research Approaches and Prospects for Participatory Action Methods	There have been many calls for an agroecological transition to respond to food shocks and crises stemming from conventional food systems. Participatory action research and transformative epistemologies, where communities are research actors rather than objects, have been proposed as a way to enhance this transition. However, despite numerous case studies, there is presently no overview of how par…	The study does not deal with agroforestry systems, according to its definition.	Camille		R
First search		10.19182/bft2018.336.a31617	Salazar-Diaz R.,	2018	Effect of plant diversity on the productivity of multi-species cropping systems: A case study on agroforestry systems in Talamanca, Costa Rica [Effet de la diversité végétale sur la productivité des systèmes de culture multi-espèces: Une étude de cas sur les systèmes agroforestiers à Talamanca, Costa Rica] [Efecto de la diversidad vegetal en la productividad de sistemas de cultivo multiespecies: …	Talamanca in Costa Rica, with its diversified cropping systems, is one of the country’s most ecologically diverse areas. The natural environment has always been an inherent part of the life of indigenous local people in this region. Tropical agro-forests are increasingly studied as a sustainable alternative to modern intensive farming systems. However, knowledge is still lacking on how functional…				R
Second search		10.1186/s13717-018-0130-z	Salunkhe, O; Khare, PK; Kumari, R; Khan, ML	2018	A systematic review on the aboveground biomass and carbon stocks of Indian forest ecosystems	Background: Tropical forests play a crucial role as source and sink in global carbon cycle. Development and other anthropogenic activities have led to degradation of forest land, and ultimately, it results in loss of biodiversity and increases concentration of CO2 in atmospheres. Therefore, there is urgent need to estimate regional and national level carbon stock for making forest-based policies …	The study does not deal with agroforestry systems, according to its definition.	Camille		R
Third search		10.5424/sjar/2023211-19218	Sanchez-Esquiliche, F; Ferreira, C; Rodriguez-Estevez, V; Muniesa, A	2023	Prediction of growth performance parameters in the growing and free-range finishing phases of the Iberian pig via meta-analysis	Aim of study: To describe and predict mathematically the growth parameters of Iberian pigs.Area of study: Iberian dehesa agroforestry system. Southwest of Iberian Peninsula.Material and methods: A quantitative and systematic review was carried out to find all studies with valid data of growth and finishing in the Iberian swine breed published up to May 2020. For the analysis of the data, a mathem…	The study does not deal with agroforestry systems, according to its definition.	Camille		R
Second search		10.3390/f10060467	Sardeshpande, M; Shackleton, C	2019	Wild Edible Fruits: A Systematic Review of an Under-Researched Multifunctional NTFP (Non-Timber Forest Product)	Wild edible fruits (WEFs) are among the most widely used non-timber forest products (NTFPs), and important sources of nutrition, medicine, and income for their users. In addition to their use as food, WEF species may also yield fiber, fuel, and a range of processed products. Besides forests, WEF species also thrive in diverse environments, such as agroforestry and urban landscapes, deserts, fallo…	The topic of the meta-analysis is out of the scope of this review.	Camille		R
Third search		10.1007/s11625-023-01379-0	Sarker, MNI; Hossain, B; Shi, GQ; Firdaus, RBR	2023	Promoting net-zero economy through climate-smart agriculture: transition towards sustainability	Climate smart agriculture (CSA) is a potential approach for promoting a net-zero economy. CSA is one of the key approaches that can provide a sufficient agri-food supply to feed a rapidly increasing population with minimum greenhouse gas (GHG) emissions worldwide. Net-zero is an intrinsic approach to tackling the adverse effects of climate change that ensures minimum GHG emissions and removes GHG…	The paper is neither a systematic review nor a meta-analysis of primary research.	Camille		R
Third search		10.1016/j.gloenvcha.2013.11.009	Schirmer, J; Bull, L	2014	Assessing the likelihood of widespread landholder adoption of afforestation and reforestation projects	Tree planting for carbon sequestration is a commonly proposed climate change mitigation strategy, with afforestation projects forming part of voluntary and mandatory carbon offset trading schemes. Afforestation is often promoted as a new economic opportunity for private landholders. While multiple studies have identified physical and economic opportunities for afforestation, few have examined the…	The topic of the meta-analysis is out of the scope of this review.	Camille		R
fourth search		10.1111/1477-9552.12570	Schulze, C; Zagórska, K; Häfner, K; Markiewicz, O; Czajkowski, M; Matzdorf, B	2024	Using farmers' ex ante preferences to design agri-environmental contracts: A systematic review	Ensuring that farmers' ex ante preferences are accounted for is crucial for the design of effective agri-environmental contracts. We present a systematic review of 127 discrete choice experiment (DCE) studies of farmers' preferences with respect to agri-environmental contracts. DCE studies evaluate two central features of farmers' behaviour: (1) their willingness to accept land use prescriptions,…	The topic of the meta-analysis is out of the scope of this review.	Camille		R
First search		10.1071/SR05013	Scott, NA; Tate, KR; Ross, DJ; Parshotam, A	2006	Processes influencing soil carbon storage following afforestation of pasture with Pinus radiata at different stocking densities in New Zealand	Since 1992, afforestation with Pinus radiata D. Don in New Zealand has led to the establishment of over 600 000 ha of new plantation forests, about 85% of which are on fertile pastures used previously for grazing sheep and cattle. While this leads to rapid accumulation of carbon ( C) in vegetation, the effects of afforestation on soil C are poorly understood. We examined key soil C cycling proces…	The paper is neither a systematic review nor a meta-analysis of primary research.			R
Second search		10.3389/fsufs.2022.834867	Segnon, AC; Zougmore, RB; Green, R; Ali, Z; Carr, TW; Houessionon, P; M'boob, S; Scheelbeek, PFD	2022	Climate change adaptation options to inform planning of agriculture and food systems in The Gambia: A systematic approach for stocktaking	Identifying and assessing adaptation options are key pre-requisite steps to adaptation prioritization and effective adaptation planning. In this paper, we presented a systematic approach for adaptation stocktaking, combining a systematic mapping and an outcome-oriented and evidence-based assessment, illustrated using the case of The Gambia. This study systematically mapped 24 adaptation options t…	The topic of the meta-analysis is out of the scope of this review.	Camille		R
Third search		10.13243/j.cnki.slxb.20221001	Shi W.; Qin B.	2023	Cyanobacterial blooms in lakes and reservoirs under climate change: Future trend and control strategy; [气候变化下湖库蓝藻水华发展趋势及防控对策]	Agroforestry (AF) is a relevant socio-ecological system in Mediterranean countries that plays a remarkable role in providing ecosystem services (ES). However, AF ecosystems have been declining (e.g. due to land abandonment), compromising the provision of some ES, such as fire regulating services. As a result, Portugal has introduced new legislation to promote fire-smart landscapes through reconve…	The study does not deal with agroforestry systems, according to its definition.	Camille		R
Second search		10.3390/f12060664	Shin, S; Park, MS; Lee, H; Lee, S; Lee, H; Kim, TH; Kim, HJ	2021	Global Trends in Research on Wild-Simulated Ginseng: Quo Vadis?	To the best of our knowledge, no study has systematically reviewed and analyzed the research trends of wild-simulated ginseng (WSG) used for food or medicinal purposes in many countries. WSG, a non-timber forest product, has been traditionally produced using agroforestry practices, and it has been consumed in various ways for a long time. WSG has a great demand in the market due to its medicinal …	The topic of the meta-analysis is out of the scope of this review.	Camille		R
Third search		10.1016/j.still.2023.105863	Siddique, KHM; Bolan, N; Rehman, A; Farooq, M	2024	Enhancing crop productivity for recarbonizing soil	Plants capture atmospheric carbon dioxide (CO2) for carbon (C) assimilation through photosynthesis, with the photosynthates stored as plant biomass (above- and below-ground plant parts). The C stored as living biomass is a short-term C sequestration strategy, whereas soil organic carbon (SOC) is a long-term C sequestration strategy. In this regard, plant roots are the primary route of C entry int…	The paper is neither a systematic review nor a meta-analysis of primary research.	Camille		R
Second search		10.3389/fenvs.2021.737659	Smith, AC; Tasnim, T; Irfanullah, HM; Turner, B; Chausson, A; Seddon, N	2021	Nature-based Solutions in Bangladesh: Evidence of Effectiveness for Addressing Climate Change and Other Sustainable Development Goals	Many lower-income countries are highly vulnerable to the impacts of natural disasters and climate change, due to their geographical location and high levels of poverty. In response, they are developing climate action plans that also support their sustainable development goals, but conventional adaptation approaches such as hard flood defenses can be expensive and unsustainable. Nature-based solut…	The topic of the meta-analysis is out of the scope of this review.	Camille		R
fourth search		10.1016/j.geoderma.2023.116726	Steinfeld, JP; Bianchi, FJJA; Locatelli, JL; Rizzo, R; Resende, MEBD; Ballester, MVR; Cerri, CEP; Bernardi, ACC; Creamer, RE	2023	Increasing complexity of agroforestry systems benefits nutrient cycling and mineral-associated organic carbon storage, in south-eastern Brazil	Agroforestry systems are often promoted as solutions to address land degradation and climate change. However, agroforestry is an umbrella term for a large variety of systems and it is not clear how their degree of complexity influences their provision of soil-based ecosystem services, such as soil organic carbon (SOC) storage and nutrient cycling. Furthermore, a knowledge gap remains whether agro…	The paper is neither a systematic review nor a meta-analysis of primary research.	Camille		R
Third search		10.1007/s10980-005-7005-2	Storch, I; Woitke, E; Krieger, S	2005	Landscape-scale edge effect in predation risk in forest-farmland mosaics of central Europe	Avian nest predation is known to increase with the degree of forest fragmentation. A common explanation is that farmland allows for high densities of generalist predators, and predators penetrating into the forest cause higher nest losses at forest-farmland edges than in forest interiors. In contrast to numerous patch-level studies of forest edge effects conducted earlier, we broadened the spatia…	The study does not deal with agroforestry systems, according to its definition.	Camille		R
Third search		10.1016/j.scitotenv.2023.167061	Sun, SP; Wang, Q; Wang, XM; Wu, CL; Zhang, X; Bai, JR; Sun, BZ	2023	Dry torrefaction and continuous thermochemical conversion for upgrading agroforestry waste into eco-friendly energy carriers: Current progress and future prospect	Agroforestry Waste (AW) is seen as a carbon neutral resource. However, the poor quality of AW reduced its potential application value. Even more unfortunately, chlorine in AW led to the formation of organic pollutants such as dioxins under higher temperatures. Alkali and alkaline earth metals (AAEMs) in ash may deepen the reaction degree. Co-pretreatment of dry torrefaction and de-ashing followed…	The study does not deal with agroforestry systems, according to its definition.	Camille		R
Third search		10.1016/j.cropro.2016.09.017	Tedford E.C.; Kriss A.B.; Geater C.; Saini M.; Battles B.; Smelser R.B.; Fithian W.A.	2017	Plot size can influence yield benefits from fungicides on corn	Use of foliar fungicides on corn has increased over the last decade. Part of the reason for this increase is due to physiological benefits on plants from QoI (strobilurin) containing fungicides. However, there remains controversy over how significant yield and economic benefits are from strobilurin fungicides. A potential source of this controversy might be explained by experimental plot size. To…	The study does not deal with agroforestry systems, according to its definition.	Camille		R
First search		10.3389/fevo.2018.00192	Tixier, MS	2018	Predatory Mites (Acari: Phytoseiidae) in Agro-Ecosystems and Conservation Biological Control: A Review and Explorative Approach for Forecasting Plant-Predatory Mite Interactions and Mite Dispersal	Phytoseiidae mites are efficient predators, able to control pest mites and small arthropods in crops all over the world, using three biological control strategies: (i) augmentation, (ii) classical, and (iii) conservation. This paper focuses on the latter strategy. Most of those predatory mite species are generalist predators; they are naturally present in agro-ecosystems both on crops and adjacen…				R
Third search		10.14483/2256201X.19981	Valderrama C.F.; Cerón A.; Herrera J.P.; Diaz L.	2023	Analyzing Urban Agroforestry: A Systematic Review and Bibliometric Analysis	Uncontrolled urban development is generating an imbalance between urban ecosystems and the ecosystem services provided by them. This work is a systematic review and a bibliometric analysis of the results of scientific research on urban agroforestry, with the aim to identify global trends in this field of knowledge. The bibliometric analysis was based on a review of the Scopus and Web of Science (…	The paper is not written in English.	Camille		R
fourth search		10.1007/s10457-024-00985-w	Wang, JW; Qin, XY; Tan, YQ; Du, YQ; Tudi, Y; Yang, YH; Ping, XY	2024	Impact of grass cover on the soil physicochemical properties in China's orchards: A meta-analysis	Grass cover in orchards has been proposed as a sustainable management system with greater ecological and economic benefits than open pastures. However, few studies have compared the ecological impact of grass-covered orchards with that of traditional tilled systems. Therefore, this meta-analysis was focused on evaluating the ecological benefits of grass cover in orchards on the soil physicochemic…	The topic of the meta-analysis is out of the scope of this review.	Camille		R
Second search		10.1073/pnas.1917692116	Wang, LX; D'Odorico, P	2019	Water limitations to large-scale desert agroforestry projects for carbon sequestration		The paper is neither a systematic review nor a meta-analysis of primary research.	Camille		R
Second search		10.3389/ffgc.2022.880621	Watts, M; Hutton, C; Guel, EOM; Suckall, N; Peh, KSH	2022	Impacts of climate change on tropical agroforestry systems: A systematic review for identifying future research priorities	Limited modeling studies are available for the process-based simulation of ecosystem services (ESS) and biodiversity (BD) in agroforestry systems (AFS). To date, limited field scale AFs models are available to simulate all possible ESS and BD together. We conducted an extensive systematic review of available agroforestry (AF), BD, and soil erosion models for the simulation potential of seven most…	The topic of the meta-analysis is out of the scope of this review.	Camille		R
Third search		10.3390/su8060574	Wilson, MH; Lovell, ST	2016	Agroforestry-The Next Step in Sustainable and Resilient Agriculture	Agriculture faces the unprecedented task of feeding a world population of 9 billion people by 2050 while simultaneously avoiding harmful environmental and social effects. One effort to meet this challenge has been organic farming, with outcomes that are generally positive. However, a number of challenges remain. Organic yields lag behind those in conventional agriculture, and greenhouse gas emiss…	The paper is neither a systematic review nor a meta-analysis of primary research.	Camille		R
Third search		10.3389/fsufs.2023.1117805	Winstead, DJ; Jacobson, MG; Di Gioia, F	2023	Valorizing staple Native American food plants as a food resilience resource	Introduction: Increased risks fromglobal climate change and sun-blocking global catastrophic risks (such as a nuclear winter), warrant the reevaluation of our food systems and their resilience to these climatic changes. Increasing native agrobiodiversity is a simple way of increasing food system resilience, and despite the vast amount of native genetic resources available in North America, the Un…	The study does not deal with agroforestry systems, according to its definition.	Camille		R
Second search		10.5846/stxb201908101677	Xia P.; Song S.; Liu Z.; He C.; Wang Y.	2020	Research progress of evaluation on the impacts of urban landscape dynamics on water-related ecosystem services in Inland River Basin, China	To improve the human well-being and promote the sustainable development of cities in inland river basins (IRBs) in China, it is important to summarize the current progress of the impacts of urban landscape dynamics (ULD) on the water-related ecosystem services (WES) in the IRBs. This paper systematically reviewed the progress of relevant research. The results showed that, in general, the number o…	The topic of the meta-analysis is out of the scope of this review.	Camille		R
Second search		10.1016/j.scitotenv.2022.158538	Xiao J.; Xiong K.	2022	A review of agroforestry ecosystem services and its enlightenment on the ecosystem improvement of rocky desertification control	Agroforestry (AF) has become an important strategy in reconciling the contradictory requirements of environmental protection and economic development in ecologically fragile areas, and whose multiple ecosystem services provide effective ways to promote the restoration of degraded ecosystems in the region. However, agroforestry ecosystem services (AFES) are usually constrained by their generative …	The topic of the meta-analysis is out of the scope of this review.	Camille		R
Second search		10.1016/j.fcr.2023.108854	Xing Y.; Yu R.-P.; An R.; Yang N.; Wu J.-P.; Ma H.-Y.; Zhang J.-D.; Bao X.-G.; Lambers H.; Li L.	2023	Two pathways drive enhanced nitrogen acquisition via a complementarity effect in long-term intercropping	Context or problem: The complementarity effect (CE) that leads to more efficient utilization of resources has been invoked to explain the biodiversity-ecosystem functioning (BEF) relationships. Dinitrogen (N2) fixation by legumes is a widely-accepted pathway to enhance N acquisition in diverse species communities. However, the relationships among positive CE, N2 fixation, and soil N cycling are s…	The study does not deal with agroforestry systems, according to its definition.	Andrea		R
Second search		10.1016/j.pld.2017.04.003	Yan K.; Ranjitkar S.; Zhai D.; Li Y.; Xu J.; Li B.; Lu Y.	2017	Current re-vegetation patterns and restoration issues in degraded geological phosphorus-rich mountain areas: A synthetic analysis of Central Yunnan, SW China	China has the largest area of inland geological phosphorus-rich (GPR) mountains in the world, where vegetation restoration is key to safeguarding the environment. We reviewed the published literature and collected new data in order to analyze re-vegetation patterns and the status of plant communities in central Yunnan. The aim of our analysis was to suggest future improvements to restoration stra…	The topic of the meta-analysis is out of the scope of this review.	Camille		R
First search		10.1016/j.foreco.2015.09.016	Yuen J.Q., Fung T., Ziegler A.D.,	2016	Review of allometric equations for major land covers in SE Asia: Uncertainty and implications for above- and below-ground carbon estimates,	Our review of biomass studies conducted for 11 Southeast Asian countries, Papua New Guinea, and southern China uncovered 402 above-ground and 138 below-ground biomass allometric equations for the following major land covers: forest, peat swamp forest, mangrove forest, logged over forest, orchard and tree plantation, rubber plantation, oil palm plantation, bamboo, swidden fallow, and grassland/pas…				R
Third search		10.1002/hyp.14957	Zema D.A.; Lucas-Borja M.E.	2023	Effects of prescribed fire on the post-fire hydrological processes in agro-forest ecosystems: A systematic review and a meta-analysis	Prescribed fires are one of the most effective tools to reduce the risk of wildfires but this treatment may negatively affect the hydrological and erosive response of soil, with noticeable increases in surface runoff and soil erosion. Many studies have been published on this matter but there is no consensus in the literature on the magnitude and duration of these effects since the relevant hydrol…	The topic of the meta-analysis is out of the scope of this review.	Camille		R
Third search		10.3390/f14102045	Zhang W.; Su K.; Wang Q.; Yang L.; Sun W.; Ranjitkar S.; Shen L.; Kindt R.; Ji Y.; Marshall P.; Pisey P.S.; El-Kassaby Y.A.	2023	Agroforestry Species Selection for Forest Rehabilitation in the Asia-Pacific Region: A Meta-Analysis on High-Level Taxonomy	Agroforestry is important for forest management and rehabilitation in the southeast Asia-Pacific Region (APR), where economic issues, intensive land use, deforestation, and forest degradation are common. Species selection is a key process in establishing agroforestry systems. In this study, we reviewed the agroforestry literature across eight economies within the southeast APR, documented the spe…	The topic of the meta-analysis is out of the scope of this review.	Camille		R
Second search		10.32604/phyton.2022.020323	Zhang, JK; Zhang, SY; Niu, CH; Jiang, J; Sun, HJ	2022	Positive Effects of Biochar on the Degraded Forest Soil and Tree Growth in China: A Systematic Review	Soil degradation threatens the forest sustainable productivity, particularly in afforestation system. Biochar derived from agroforestry waste or biomass can potentially improve the degraded forest soil and promote the tree growth. To expand the application of biochar for forestry productivity improvement, we here reviewed the effects and the underlying mechanisms of biochar on the degraded forest…	The topic of the meta-analysis is out of the scope of this review.	Camille		R
Second search		10.1016/j.jes.2019.02.030	Zheng, H; Wang, LJ; Wu, T	2019	Coordinating ecosystem service trade-offs to achieve win-win outcomes: A review of the approaches	Ecosystem service (ES) trade-offs have been broadly recognized and studied over the past decade. However, how to coordinate the relationships among ES trade-offs to achieve win-win outcomes remains a considerable challenge for decision makers. Here, we summarize the current approaches applied to minimize ES trade-offs for win-wins and analyze the trade-offs among different ESs and their drivers. …	The topic of the meta-analysis is out of the scope of this review.	Camille		R
fourth search		10.3390/agriculture13112165	Zheng, JQ; Xu, YL	2023	A Review: Development of Plant Protection Methods and Advances in Pesticide Application Technology in Agro-Forestry Production	In this review, through reviewing the history of the struggle between human beings and plant diseases, insects and weeds, more specifically thoughts on plant protection in ancient Chinese agricultural books, the recognition of plant pests as a target and six types of plant protection methods and 36 subdivision measures are summarized. Then, we focus on the development overview of pesticide applic…	The topic of the meta-analysis is out of the scope of this review.	Camille		R
fourth search		10.1079/cabireviews202217047		2022	Assessing the sustainability of silvopasture systems	As the negative effects of conventional agricultural practices on ecosystems intensify, discourse is turning to more sustainable production systems. Silvopasture, an agroecological practice involving the integration of trees, forage, and livestock, has been proposed as one option to enhance agroecological and community resiliency in the face of climate change. Considerable research has been publi…	The systematic review is not presenting quantitative data (either with or without full statistical analysis)	Camille		R

## Sheet: S Table 4
Sustainability_outcome	Impact_category	Metric	CICES_Calss-code	CICES_Group	Number of assessments per metric
Carbon sequestration	Carbon sequestration	Organic carbon sequestration rate (aboveground biomass)	2.3.6.1	Atmospheric composition and conditions	37
Carbon sequestration	Carbon sequestration	Organic carbon stock (aboveground + belowground biomass)	2.3.6.1	Atmospheric composition and conditions	17
Carbon sequestration	Carbon sequestration	Organic carbon sequestration rate (belowground biomass)	2.3.6.1	Atmospheric composition and conditions	12
Carbon sequestration	Carbon sequestration	Organic carbon sequestration rate (soil + aboveground + belowground biomass)	2.3.6.1	Atmospheric composition and conditions	8
GHG emissions	GHG emissions	Nitrous oxide emission (soil)	2.3.6.1	Atmospheric composition and conditions	8
GHG emissions	Global warming potential (LCA)	Global warming potential	2.3.6.1	Atmospheric composition and conditions	7
GHG emissions	GHG emissions	Methane emission (soil)	2.3.6.1	Atmospheric composition and conditions	6
Carbon sequestration	Carbon sequestration	Organic carbon stock (aboveground biomass)	2.3.6.1	Atmospheric composition and conditions	4
Carbon sequestration	Carbon sequestration	Organic carbon stock (soil + belowground biomass)	2.3.6.1	Atmospheric composition and conditions	4
GHG emissions	GHG emissions	Aggregated GHGs emission (soil)	2.3.6.1	Atmospheric composition and conditions	3
Carbon sequestration	Carbon sequestration	Organic carbon sequestration rate (soil)	2.3.6.1	Atmospheric composition and conditions	2
Carbon sequestration	Carbon sequestration	Organic carbon sequestration rate (aboveground + belowground biomass)	2.3.6.1	Atmospheric composition and conditions	1
GHG emissions	GHG emissions	Net carbon-GHG balance	2.3.6.1	Atmospheric composition and conditions	1
Agricultural production	Crop yield	Crop yield (arable crops)	1.1.1.1	Cultivated terrestrial plants for nutrition, materials or energy	174
Agricultural production	Grassland production	Net primary productivity (grass)	1.1.1.1	Cultivated terrestrial plants for nutrition, materials or energy	37
Agricultural production	Farming system productivity	Land equivalent ratio (LER)	1.1.1.1	Cultivated terrestrial plants for nutrition, materials or energy	2
Agricultural production	Grassland production	forage yield	1.1.1.1	Cultivated terrestrial plants for nutrition, materials or energy	2
Agricultural production	Crop yield	Grain yield (grain)	1.1.1.1	Cultivated terrestrial plants for nutrition, materials or energy	1
Agricultural production	Farming system productivity	Food production yield	1.1.1.1	Cultivated terrestrial plants for nutrition, materials or energy	1
Agricultural production	Grassland production	Net primary productivity	1.1.1.1	Cultivated terrestrial plants for nutrition, materials or energy	1
Soil health	Soil erosion	Soil erosion parameters	2.2.1.1	Erosion control	24
Biodiversity	Biodiversity	Biodiversity parameters (aggregated)	2.3.2.3	Lifecycle maintenance, habitat and gene pool protection	4
Biodiversity	Biodiversity	Taxonomic parameters (arthropod)	2.3.2.3	Lifecycle maintenance, habitat and gene pool protection	2
Biodiversity	Biodiversity	Taxonomic parameters (bird)	2.3.2.3	Lifecycle maintenance, habitat and gene pool protection	2
Biodiversity	Biodiversity	Taxonomic parameters (herbaceous plant)	2.3.2.3	Lifecycle maintenance, habitat and gene pool protection	2
Biodiversity	Biodiversity	Taxonomic parameters (vertebrate)	2.3.2.3	Lifecycle maintenance, habitat and gene pool protection	2
Biodiversity	Biodiversity	Taxonomic parameters (woody plant)	2.3.2.3	Lifecycle maintenance, habitat and gene pool protection	2
Biodiversity	Pollination	Functional parameters (pollinator)	2.3.2.1	Lifecycle maintenance, habitat and gene pool protection	2
Biodiversity	Pests and diseases	pest	2.3.3.1	Pest and disease control	7
Biodiversity	Pests and diseases	Functional parameters (natural enemies)	2.3.3.1	Pest and disease control	4
Biodiversity	Pests and diseases	crop damage or disease	2.3.3.2	Pest and disease control	2
Biodiversity	Pests and diseases	crop damage or disease	2.3.3.1	Pest and disease control	1
Biodiversity	Pests and diseases	Functional parameters (herbivore)	2.3.3.1	Pest and disease control	1
Biodiversity	Pests and diseases	weed	2.3.3.1	Pest and disease control	1
Biodiversity	Pests and diseases	weed (non-parasitic)	2.3.3.1	Pest and disease control	1
Biodiversity	Pests and diseases	weed (parasitic)	2.3.3.1	Pest and disease control	1
Carbon sequestration	Carbon sequestration	Organic carbon stock (soil)	2.3.4.3	Regulation of soil quality	53
Carbon sequestration	Carbon sequestration	Organic carbon sequestration rate (soil)	2.3.4.3	Regulation of soil quality	45
Carbon sequestration	Carbon sequestration	Organic carbon content (soil)	2.3.4.3	Regulation of soil quality	44
Soil health	Soil water retention	Soil water	2.3.4.3	Regulation of soil quality	13
Soil health	Soil biological quality	Taxonomic parameters (microbes)	2.3.4.2	Regulation of soil quality	12
Soil health	Soil nutrients	Soil phosphorous	2.3.4.2	Regulation of soil quality	12
Soil health	Soil nutrients	Soil nutrients (aggregated)	2.3.4.2	Regulation of soil quality	10
Soil health	Soil biological quality	Functional parameters (enzymatic activity)	2.3.4.2	Regulation of soil quality	9
Soil health	Soil nutrients	Soil nitrogen	2.3.4.2	Regulation of soil quality	9
Soil health	Soil biological quality	Soil biological quality parameters (aggregated)	2.3.4.2	Regulation of soil quality	8
Soil health	Soil physico-chemical quality	Soil bulk density	2.3.4.3	Regulation of soil quality	7
Soil health	Soil biological quality	Functional parameters (respiration)	2.3.4.2	Regulation of soil quality	6
Soil health	Soil physico-chemical quality	Soil water infiltration	2.3.4.3	Regulation of soil quality	6
Carbon sequestration	Carbon sequestration	Organic matter content (soil)	2.3.4.3	Regulation of soil quality	5
Soil health	Soil nutrients	Soil potassium	2.3.4.2	Regulation of soil quality	5
Soil health	Soil nutrients	Soil calcium	2.3.4.2	Regulation of soil quality	4
Soil health	Soil nutrients	Soil magnesium	2.3.4.2	Regulation of soil quality	4
Soil health	Soil nutrients	Soil nitrogen (mineral fractions)	2.3.4.2	Regulation of soil quality	4
Soil health	Soil physico-chemical quality	Soil carbon/nitrogen ratio	2.3.4.3	Regulation of soil quality	4
Soil health	Soil physico-chemical quality	Soil cation exchange capacity	2.3.4.3	Regulation of soil quality	4
Soil health	Soil physico-chemical quality	Soil pH	2.3.4.3	Regulation of soil quality	4
Carbon sequestration	Carbon sequestration	Total carbon content (soil)	2.3.4.3	Regulation of soil quality	3
Soil health	Soil biological quality	Taxonomic parameters (bacteria)	2.3.4.2	Regulation of soil quality	3
Soil health	Soil biological quality	Taxonomic parameters (fungi)	2.3.4.2	Regulation of soil quality	3
Soil health	Soil nutrients	Soil aluminium	2.3.4.2	Regulation of soil quality	3
Soil health	Soil nutrients	Soil iron	2.3.4.2	Regulation of soil quality	3
Soil health	Soil nutrients	Soil manganese	2.3.4.2	Regulation of soil quality	3
Soil health	Soil nutrients	Soil nitrate	2.3.4.2	Regulation of soil quality	3
Soil health	Soil nutrients	Soil nitrogen (dissolved organic fractions)	2.3.4.2	Regulation of soil quality	3
Soil health	Soil nutrients	Soil nitrogen (organic fraction)	2.3.4.2	Regulation of soil quality	3
Soil health	Soil nutrients	Soil zinc	2.3.4.2	Regulation of soil quality	3
Soil health	Soil physico-chemical quality	Soil porosity	2.3.4.3	Regulation of soil quality	3
Soil health	Soil physico-chemical quality	Soil structure	2.3.4.3	Regulation of soil quality	3
Soil health	Soil physico-chemical quality	Soil cations	2.3.4.3	Regulation of soil quality	2
Soil health	Soil physico-chemical quality	Soil electrical conductivity	2.3.4.3	Regulation of soil quality	2
Soil health	Soil nutrients	Soil electrical conductivity	2.3.4.2	Regulation of soil quality	1
Soil health	Soil nutrients	Soil potassium (available fraction)	2.3.4.2	Regulation of soil quality	1
Soil health	Soil nutrients	Soil sodium	2.3.4.2	Regulation of soil quality	1
Pollution	Nutrient leaching and run-off	Nitrogen loss	2.3.5.1	Water conditions	4
Pollution	Nutrient leaching and run-off	Phosphorous loss or run-off	2.3.5.1	Water conditions	4
Pollution	Water quality	Water nitrogen	2.3.5.1	Water conditions	4
Pollution	Nutrient leaching and run-off	Potassium loss or run-off	2.3.5.1	Water conditions	3
Pollution	Nutrient leaching and run-off	Micronutrients loss	2.3.5.1	Water conditions	2
Pollution	Nutrient leaching and run-off	Nitrogen interception (subsurface)	2.3.5.1	Water conditions	1
Pollution	Nutrient leaching and run-off	Nitrogen interception (surface)	2.3.5.1	Water conditions	1
Pollution	Nutrient leaching and run-off	Phosphorous interception	2.3.5.1	Water conditions	1

## Sheet: S Table 5
Criterion	Criterion name	Criterion rationale
1	Objectives specified	The aims or objectives of the sysnthesis or the research questions constituting the aims of the analysis are typically stated by the authors in the introduction section, using bullet points.
2	Search databases reported	The search databases (e.g. Scopus, Web of Science, etc.) are clearly mentioned in the text.
3	Search string reported	The search string(s) is/are clearly reported in details, using accurate booleans and lisitng all keywords and stemmings.
4	Selection criteria reported	The selection (inclusion/exclusion) criteria are mentioned and clearly explained.
5	Standard PRISMA statement reported	All details of the selection process are described at each step, following clear exclusion and inclusion criteria (e.g. Prisma statement diagram).
6	List of studies available	The list of selected studies is reported and complete of full references.
7	Method of data selection and extraction reported	The methods used for data selection, extraction and storage is clearly explained.
8	Quantitative results described	A quantitative assessment of the effects is presented, complete of proper statistics.
9	Statistical methods described	The statistical methods used for data analysis are clearly described.
10	Individual effect sizes reported	Individual effect sizes of primary-studies comparisons are reported (e.g. forest plot or tables).
11	Heterogeneity of results analyzed	Heterogeneity of the effects is analysed, analysing potential moderators, using sub-group effect sizes estimation or meta-regression.
12	Individual study weighted	The statistical model is based on weighting individual studies or experiments or observations, according to their number of repetitions, variance or other parameters.
13	Confidence intervals estimated	Confidence intervals or other variance metric are presented in the statistical model.
14	Primary data available	The primary-studies dataset is made available and accessible.
15	Funding sources mentioned	The funding sources and institutions are clearly reported.
16	Publication bias analyzed	The publication bias was analysed.

## Sheet: S Table 6
ID	Filter	Section	Division	Group	Class	Code	Covered
1	CICES (Biophysical ecosystem services))	Provisioning (Biotic/Biophysical)	Biomass	Cultivated terrestrial plants for nutrition, materials or energy	Cultivated terrestrial plants (including fungi, algae) grown for nutritional purposes	1.1.1.1	1
2	CICES (Biophysical ecosystem services))	Provisioning (Biotic/Biophysical)	Biomass	Cultivated terrestrial plants for nutrition, materials or energy	Fibres and other materials from cultivated plants, fungi, algae and bacteria for direct use or processing (excluding genetic materials)	1.1.1.2	0
3	CICES (Biophysical ecosystem services))	Provisioning (Biotic/Biophysical)	Biomass	Cultivated terrestrial plants for nutrition, materials or energy	Cultivated plants (including fungi, algae) grown as a source of energy	1.1.1.3	0
4	CICES (Biophysical ecosystem services))	Provisioning (Biotic/Biophysical)	Biomass	Cultivated aquatic plants for nutrition, materials or energy	Plants cultivated by in- situ aquaculture grown for nutritional purposes	1.1.2.1	0
5	CICES (Biophysical ecosystem services))	Provisioning (Biotic/Biophysical)	Biomass	Cultivated aquatic plants for nutrition, materials or energy	Plants cultivated for fibres and other materials by in-situ aquaculture for direct use or processing (excluding genetic materials)	1.1.2.2	0
6	CICES (Biophysical ecosystem services))	Provisioning (Biotic/Biophysical)	Biomass	Cultivated aquatic plants for nutrition, materials or energy	Plants cultivated by in- situ aquaculture grown as an energy source	1.1.2.3	0
7	CICES (Biophysical ecosystem services))	Provisioning (Biotic/Biophysical)	Biomass	Reared animals for nutrition, materials or energy	Animals reared for nutritional purposes	1.1.3.1	0
8	CICES (Biophysical ecosystem services))	Provisioning (Biotic/Biophysical)	Biomass	Reared animals for nutrition, materials or energy	Fibres and other materials from reared animals for direct use or processing (excluding genetic materials)	1.1.3.2	0
9	CICES (Biophysical ecosystem services))	Provisioning (Biotic/Biophysical)	Biomass	Reared animals for nutrition, materials or energy	Animals reared to provide energy (including mechanical)	1.1.3.3	0
10	CICES (Biophysical ecosystem services))	Provisioning (Biotic/Biophysical)	Biomass	Reared aquatic animals for nutrition, materials or energy	Animals reared by in-situ aquaculture for nutritional purposes	1.1.4.1	0
11	CICES (Biophysical ecosystem services))	Provisioning (Biotic/Biophysical)	Biomass	Reared aquatic animals for nutrition, materials or energy	Fibres and other materials from animals grown by in-situ aquaculture for direct use or processing (excluding genetic materials)	1.1.4.2	0
12	CICES (Biophysical ecosystem services))	Provisioning (Biotic/Biophysical)	Biomass	Reared aquatic animals for nutrition, materials or energy	Animals reared by in-situ aquaculture as an energy source	1.1.4.3	0
13	CICES (Biophysical ecosystem services))	Provisioning (Biotic/Biophysical)	Biomass	Wild plants (terrestrial and aquatic) for nutrition, materials or energy	Wild plants (terrestrial and aquatic, including fungi, algae) used for nutrition	1.1.5.1	0
14	CICES (Biophysical ecosystem services))	Provisioning (Biotic/Biophysical)	Biomass	Wild plants (terrestrial and aquatic) for nutrition, materials or energy	Fibres and other materials from wild plants for direct use or processing (excluding genetic materials)	1.1.5.2	0
15	CICES (Biophysical ecosystem services))	Provisioning (Biotic/Biophysical)	Biomass	Wild plants (terrestrial and aquatic) for nutrition, materials or energy	Wild plants (terrestrial and aquatic, including fungi, algae) used as a source of energy	1.1.5.3	0
16	CICES (Biophysical ecosystem services))	Provisioning (Biotic/Biophysical)	Biomass	Wild animals (terrestrial and aquatic) for nutrition, materials or energy	Wild animals (terrestrial and aquatic) used for nutritional purposes	1.1.6.1	0
17	CICES (Biophysical ecosystem services))	Provisioning (Biotic/Biophysical)	Biomass	Wild animals (terrestrial and aquatic) for nutrition, materials or energy	Fibres and other materials from wild animals for direct use or processing (excluding genetic materials)	1.1.6.2	0
18	CICES (Biophysical ecosystem services))	Provisioning (Biotic/Biophysical)	Biomass	Wild animals (terrestrial and aquatic) for nutrition, materials or energy	Wild animals (terrestrial and aquatic) used as a source of energy	1.1.6.3	0
19	CICES (Biophysical ecosystem services))	Provisioning (Biotic/Biophysical)	Genetic material from all biota (including seed, spore or gamete production)	Genetic material from plants, algae or fungi	Seeds, spores and other plant materials collected for maintaining or establishing a population	1.2.1.1	0
20	CICES (Biophysical ecosystem services))	Provisioning (Biotic/Biophysical)	Genetic material from all biota (including seed, spore or gamete production)	Genetic material from plants, algae or fungi	Higher and lower plants (whole organisms) used to breed new strains or varieties	1.2.1.2	0
21	CICES (Biophysical ecosystem services))	Provisioning (Biotic/Biophysical)	Genetic material from all biota (including seed, spore or gamete production)	Genetic material from plants, algae or fungi	Individual genes extracted from higher and lower plants for the design and construction of new biological entities	1.2.1.3	0
22	CICES (Ecosystem Services)	Provisioning (Biotic/Biophysical)	Genetic material from all biota (including seed, spore or gamete production)	Genetic material from animals	Animal material collected for the purposes of maintaining or establishing a population	1.2.2.1	0
23	CICES (Ecosystem Services)	Provisioning (Biotic/Biophysical)	Genetic material from all biota (including seed, spore or gamete production)	Genetic material from animals	Wild animals (whole organisms) used to breed new strains or varieties	1.2.2.2	0
24	CICES (Ecosystem Services)	Provisioning (Biotic/Biophysical)	Genetic material from all biota (including seed, spore or gamete production)	Genetic material from organisms	Individual genes extracted from organisms for the design and construction of new biological entities	1.2.2.3	0
25	CICES (Ecosystem Services)	Provisioning (Biotic/Biophysical)	Other types of provisioning service from biotic sources	Other	Other	1.3.X.X	0
26	CICES (Ecosystem Services)	Regulation & Maintenance (Biotic/Biophysical)	Transformation of biochemical or physical inputs to ecosystems	Reduction of nutrient loads and mediation of wastes or toxic substances of anthropogenic origin by living processes	Bio-remediation by micro-organisms, algae, plants, and animals	2.1.1.1	0
27	CICES (Ecosystem Services)	Regulation & Maintenance (Biotic/Biophysical)	Transformation of biochemical or physical inputs to ecosystems	Reduction of nutrient loads and mediation of wastes or toxic substances of anthropogenic origin by living processes	Filtration/sequestration/storage/accumulation by micro-organisms, algae, plants, and animals	2.1.1.2	0
28	CICES (Ecosystem Services)	Regulation & Maintenance (Biotic/Biophysical)	Transformation of biochemical or physical inputs to ecosystems	Mediation of nuisances of anthropogenic origin	Smell reduction	2.1.2.1	0
29	CICES (Ecosystem Services)	Regulation & Maintenance (Biotic/Biophysical)	Transformation of biochemical or physical inputs to ecosystems	Mediation of nuisances of anthropogenic origin	Noise attenuation	2.1.2.2	0
30	CICES (Ecosystem Services)	Regulation & Maintenance (Biotic/Biophysical)	Transformation of biochemical or physical inputs to ecosystems	Mediation of nuisances of anthropogenic origin	Visual screening	2.1.2.3	0
31	CICES (Ecosystem Services)	Regulation & Maintenance (Biotic/Biophysical)	Regulation of baseline flows and extreme events	Erosion control	Control of water erosion rates	2.2.1.1	1
32	CICES (Ecosystem Services)	Regulation & Maintenance (Biotic/Biophysical)	Regulation of baseline flows and extreme events	Erosion control	Control of wind erosion rates	2.2.1.2	0
33	CICES (Ecosystem Services)	Regulation & Maintenance (Biotic/Biophysical)	Regulation of baseline flows and extreme events	Hydrological cycle and water flow regulation	Regulation runoff and base flows	2.2.2.1	0
34	CICES (Ecosystem Services)	Regulation & Maintenance (Biotic/Biophysical)	Regulation of baseline flows and extreme events	Hydrological cycle and water flow regulation	Regulation of peak flows	2.2.2.2	0
35	CICES (Ecosystem Services)	Regulation & Maintenance (Biotic/Biophysical)	Regulation of baseline flows and extreme events	Regulation of baseline flows and extreme events	Buffering and attenuation of mass movement	2.2.3.1	0
36	CICES (Ecosystem Services)	Regulation & Maintenance (Biotic/Biophysical)	Regulation of baseline flows and extreme events	Hazard mitigation	Flood and storm surge mitigation	2.2.3.2	0
37	CICES (Ecosystem Services)	Regulation & Maintenance (Biotic/Biophysical)	Regulation of baseline flows and extreme events	Hazard mitigation	Wind protection	2.2.3.3	0
38	CICES (Ecosystem Services)	Regulation & Maintenance (Biotic/Biophysical)	Regulation of baseline flows and extreme events	Hazard mitigation	Fire protection	2.2.3.4	0
39	CICES (Ecosystem Services)	Regulation & Maintenance (Biotic/Biophysical)	Regulation of physical, chemical, biological conditions	Lifecycle maintenance, habitat and gene pool protection	Pollination (or 'gamete' dispersal in a marine context)	2.3.2.1	1
40	CICES (Ecosystem Services)	Regulation & Maintenance (Biotic/Biophysical)	Regulation of physical, chemical, biological conditions	Lifecycle maintenance, habitat and gene pool protection	Seed dispersal	2.3.2.2	0
41	CICES (Ecosystem Services)	Regulation & Maintenance (Biotic/Biophysical)	Regulation of physical, chemical, biological conditions	Lifecycle maintenance, habitat and gene pool protection	Maintaining or regulating nursery populations and habitats or breeding grounds (Includes gene pool protection)	2.3.2.3	1
42	CICES (Ecosystem Services)	Regulation & Maintenance (Biotic/Biophysical)	Regulation of physical, chemical, biological conditions	Lifecycle maintenance, habitat and gene pool protection	Maintaining or regulating refuge habitats	2.3.2.4	0
43	CICES (Ecosystem Services)	Regulation & Maintenance (Biotic/Biophysical)	Regulation of physical, chemical, biological conditions	Lifecycle maintenance, habitat and gene pool protection	Maintaining or regulating feeding grounds	2.3.2.5	0
44	CICES (Ecosystem Services)	Regulation & Maintenance (Biotic/Biophysical)	Regulation of physical, chemical, biological conditions	Pest and disease control	Pest control (including invasive species)	2.3.3.1	1
45	CICES (Ecosystem Services)	Regulation & Maintenance (Biotic/Biophysical)	Regulation of physical, chemical, biological conditions	Pest and disease control	Disease control	2.3.3.2	1
46	CICES (Ecosystem Services)	Regulation & Maintenance (Biotic/Biophysical)	Regulation of physical, chemical, biological conditions	Regulation of soil quality	Biologically mediated weathering processes and their effect on soil quality	2.3.4.1	0
47	CICES (Ecosystem Services)	Regulation & Maintenance (Biotic/Biophysical)	Regulation of physical, chemical, biological conditions	Regulation of soil quality	Decomposition and fixing processes and their effect on soil quality	2.3.4.2	1
48	CICES (Ecosystem Services)	Regulation & Maintenance (Biotic/Biophysical)	Regulation of physical, chemical, biological conditions	Regulation of soil quality	Maintenance of soil structure by biological agents and ecological processes	2.3.4.3	1
49	CICES (Ecosystem Services)	Regulation & Maintenance (Biotic/Biophysical)	Regulation of physical, chemical, biological conditions	Water conditions	Regulation of the chemical condition of freshwaters by living processes	2.3.5.1	1
50	CICES (Ecosystem Services)	Regulation & Maintenance (Biotic/Biophysical)	Regulation of physical, chemical, biological conditions	Water conditions	Regulation of the chemical condition of salt waters by living processes	2.3.5.2	0
51	CICES (Ecosystem Services)	Regulation & Maintenance (Biotic/Biophysical)	Regulation of physical, chemical, biological conditions	Atmospheric composition and conditions	Regulation of chemical composition of atmosphere and oceans, including maintaining rainfall patterns through evapotranspiration at the sub-continental scale	2.3.6.1	1
52	CICES (Ecosystem Services)	Regulation & Maintenance (Biotic/Biophysical)	Regulation of physical, chemical, biological conditions	Atmospheric composition and conditions	Regulation of temperature and humidity, including ventilation and transpiration at local scales	2.3.6.2	0
53	CICES (Ecosystem Services)	Regulation & Maintenance (Biotic/Biophysical)	Other types of regulation and maintenance service by living processes	Other	Other	2.4.X.X	0
54	CICES (Ecosystem Services)	Cultural (Biotic/Biophysical)	Physical and experiential interactions with natural environment	Direct, in-situ and outdoor interactions with living systems that depend on presence in the environmental setting, i.e. broadly recreational activities	Elements of living systems that that enable activities promoting health, recuperation or enjoyment through active or immersive interactions	3.1.1.1	0
55	CICES (Ecosystem Services)	Cultural (Biotic/Biophysical)	Physical and experiential interactions with natural environment	Direct, in-situ and outdoor interactions with living systems that depend on presence in the environmental setting, i.e. broadly recreational activities	Elements of living systems that enable activities promoting health, recuperation or enjoyment through passive or observational interactions	3.1.1.2	0
56	CICES (Ecosystem Services)	Cultural (Biotic/Biophysical)	Intellectual and representative interactions with natural environment	Direct, in-situ and outdoor interactions with living systems that depend on presence in the environmental setting	Elements of living systems that enable scientific investigation or the creation of traditional ecological knowledge	3.2.1.1	0
57	CICES (Ecosystem Services)	Cultural (Biotic/Biophysical)	Intellectual and representative interactions with natural environment	Direct, in-situ and outdoor interactions with living systems that depend on presence in the environmental setting	Elements of living systems that enable education and training	3.2.1.2	0
58	CICES (Ecosystem Services)	Cultural (Biotic/Biophysical)	Intellectual and representative interactions with natural environment	Direct, in-situ and outdoor interactions with living systems that depend on presence in the environmental setting	Elements of living systems that are resonant in terms of culture or heritage	3.2.1.3	0
59	CICES (Ecosystem Services)	Cultural (Biotic/Biophysical)	Intellectual and representative interactions with natural environment	Direct, in-situ and outdoor interactions with living systems that depend on presence in the environmental setting	Elements of living systems that enable aesthetic experiences	3.2.1.4	0
60	CICES (Ecosystem Services)	Cultural (Biotic/Biophysical)	Intellectual and representative interactions with natural environment	Indirect, interactions with living systems	Elements of living systems used for entertainment or representation outside the setting concerned	3.3.1.1	0
61	CICES (Ecosystem Services)	Cultural (Biotic/Biophysical)	Spiritual, symbolic and other cultural interactions with natural environment	Elements of living systems that are indirectly appreciated and have significance for people without their presence in the environmental setting.	Elements of living systems that have symbolic meaning, capture the distinctiveness of settings or their sense of place	3.4.1.1	0
62	CICES (Ecosystem Services)	Cultural (Biotic/Biophysical)	Spiritual, symbolic and other cultural interactions with natural environment	Elements of living systems that are indirectly appreciated and have significance for people without their presence in the environmental setting.	Elements of living systems that have spiritual or religious meaning	3.4.1.2	0
63	CICES (Ecosystem Services)	Cultural (Biotic/Biophysical)	Spiritual, symbolic and other cultural interactions with natural environment	Other biophysical characteristics of species or ecosystems that are appreciated in their own right by people	Elements or features of living systems whose contemporary existence or conservation is important to people	3.4.2.1	0
64	CICES (Ecosystem Services)	Cultural (Biotic/Biophysical)	Spiritual, symbolic and other cultural interactions with natural environment	Other biophysical characteristics of species or ecosystems that are appreciated in their own right by people	Elements or features of living systems whose inter-generational existence or conservation is important to people.	3.4.2.2	0
65	CICES (Ecosystem Services)	Cultural (Biotic/Biophysical)	Other characteristics of living systems that have cultural significance	Other	Other	3.5.X.X	0
66	CICES (Geosystem outputs)	Provisioning (Abiotic/geophysical)	Water	Surface water used for nutrition, materials or energy	Surface water for drinking	4.1.1.1	0
67	CICES (Geosystem outputs)	Provisioning (Abiotic/geophysical)	Water	Surface water used for nutrition, materials or energy	Surface water used as a material (non-drinking purposes)	4.1.1.2	0
68	CICES (Geosystem outputs)	Provisioning (Abiotic/geophysical)	Water	Surface water used for nutrition, materials or energy	Freshwater surface water used as an energy source	4.1.1.3	0
69	CICES (Geosystem outputs)	Provisioning (Abiotic/geophysical)	Water	Surface water used for nutrition, materials or energy	Coastal and marine water used as energy source	4.1.1.4	0
70	CICES (Geosystem outputs)	Provisioning (Abiotic/geophysical)	Water	Ground water for used for nutrition, materials or energy	Ground (and subsurface) water for drinking	4.1.2.1	0
71	CICES (Geosystem outputs)	Provisioning (Abiotic/geophysical)	Water	Ground water for used for nutrition, materials or energy	Ground water (and subsurface) used as a material (non-drinking purposes)	4.1.2.2	0
72	CICES (Geosystem outputs)	Provisioning (Abiotic/geophysical)	Water	Ground water for used for nutrition, materials or energy	Ground water (and subsurface) used as an energy source; regulation of heating and cooling.	4.1.2.3	0
73	CICES (Geosystem outputs)	Provisioning (Abiotic/geophysical)	Water	Other aqueous ecosystem outputs	Other	4.1.X.X	0
74	CICES (Geosystem outputs)	Provisioning (Abiotic/geophysical)	Non-aqueous natural abiotic ecosystem outputs	Mineral substances used for nutrition, materials or energy	Mineral substances used for nutritional purposes	4.2.1.1	0
75	CICES (Geosystem outputs)	Provisioning (Abiotic/geophysical)	Non-aqueous natural abiotic ecosystem outputs	Mineral substances used for nutrition, materials or energy	Mineral substances used for material purposes, including geophysical support (foundations).	4.2.1.2	0
76	CICES (Geosystem outputs)	Provisioning (Abiotic/geophysical)	Non-aqueous natural abiotic ecosystem outputs	Mineral substances used for nutrition, materials or energy	Mineral substances used for as an energy source	4.2.1.3	0
77	CICES (Geosystem outputs)	Provisioning (Abiotic/geophysical)	Non-aqueous natural abiotic ecosystem outputs	Non-mineral substances or ecosystem properties used for nutrition, materials or energy	Non-mineral substances or ecosystem properties used for nutritional purposes	4.2.2.1	0
78	CICES (Geosystem outputs)	Provisioning (Abiotic/geophysical)	Non-aqueous natural abiotic ecosystem outputs	Non-mineral substances or ecosystem properties used for nutrition, materials or energy	Non-mineral substances used for materials	4.2.2.2	0
79	CICES (Geosystem outputs)	Provisioning (Abiotic/geophysical)	Non-aqueous natural abiotic ecosystem outputs	Non-mineral substances or ecosystem properties used for nutrition, materials or energy	Wind energy	4.2.2.3	0
80	CICES (Geosystem outputs)	Provisioning (Abiotic/geophysical)	Non-aqueous natural abiotic ecosystem outputs	Non-mineral substances or ecosystem properties used for nutrition, materials or energy	Solar energy	4.2.2.4	0
81	CICES (Geosystem outputs)	Provisioning (Abiotic/geophysical)	Non-aqueous natural abiotic ecosystem outputs	Non-mineral substances or ecosystem properties used for nutrition, materials or energy	Geothermal from earth or stored solar energy	4.2.2.5	0
82	CICES (Geosystem outputs)	Provisioning (Abiotic/geophysical)	Non-aqueous natural abiotic ecosystem outputs	Other mineral or non-mineral substances or ecosystem properties used for nutrition, materials or energy	Other	4.2.X.X	0
83	CICES (Geosystem outputs)	Regulation & Maintenance (Abiotic/geophysical)	Transformation of biochemical or physical inputs to ecosystems	Mediation of waste, toxics and other nuisances by non-living processes	Dilution or transport of wastes by freshwater and marine ecosystems	5.1.1.1	0
84	CICES (Geosystem outputs)	Regulation & Maintenance (Abiotic/geophysical)	Transformation of biochemical or physical inputs to ecosystems	Mediation of waste, toxics and other nuisances by non-living processes	Dilution or transport of wastes by atmosphere	5.1.1.2	0
85	CICES (Geosystem outputs)	Regulation & Maintenance (Abiotic/geophysical)	Transformation of biochemical or physical inputs to ecosystems	Mediation of waste, toxics and other nuisances by non-living processes	Mediation of wastes by other chemical or physical means (e.g. via Filtration, sequestration, storage or accumulation)	5.1.1.3	0
86	CICES (Geosystem outputs)	Regulation & Maintenance (Abiotic/geophysical)	Transformation of biochemical or physical inputs to ecosystems	Mediation of waste, toxics and other nuisances by non-living processes	Geological structures and deposits for storage of anthropogenic wastes	5.1.1.4	0
87	CICES (Geosystem outputs)	Regulation & Maintenance (Abiotic/geophysical)	Transformation of biochemical or physical inputs to ecosystems	Mediation of nuisances of anthropogenic origin	Mediation of nuisances by abiotic structures or processes	5.1.2.1	0
88	CICES (Geosystem outputs)	Regulation & Maintenance (Abiotic/geophysical)	Regulation and maintenance of geophysical	Regulation of baseline flows and extreme events	Abiotic regulation of mass flows	5.2.1.1	0
89	CICES (Geosystem outputs)	Regulation & Maintenance (Abiotic/geophysical)	Regulation and maintenance of geophysical	Regulation of baseline flows and extreme events	Abiotic regulation of liquid flows	5.2.1.2	0
90	CICES (Geosystem outputs)	Regulation & Maintenance (Abiotic/geophysical)	Regulation and maintenance of geophysical	Regulation of baseline flows and extreme events	Abiotic regulation of gaseous flows	5.2.1.3	0
91	CICES (Geosystem outputs)	Regulation & Maintenance (Abiotic/geophysical)	Regulation and maintenance of geophysical	Maintenance of physical, chemical, abiotic conditions	Maintenance and regulation by inorganic natural chemical and physical processes of fresh or salt waters	5.2.2.1	0
92	CICES (Geosystem outputs)	Regulation & Maintenance (Abiotic/geophysical)	Regulation and maintenance of geophysical	Maintenance of physical, chemical, abiotic conditions	Maintenance and regulation by inorganic natural chemical and physical processes of atmosphere	5.2.2.2	0
93	CICES (Geosystem outputs)	Regulation & Maintenance (Abiotic/geophysical)	Other type of regulation and maintenance service by abiotic processes	Other	Other	5.3.X.X	0
94	CICES (Geosystem outputs)	Cultural (Abiotic/geophysical)	Physical and experiential interactions with biophysical environment	Direct, in-situ and outdoor interactions with geophysical systems that depend on presence in the environmental setting	Characteristics of geophysical systems that that enable activities promoting health, recuperation or enjoyment through active or immersive interactions	6.1.1.1	0
95	CICES (Geosystem outputs)	Cultural (Abiotic/geophysical)	Physical and experiential interactions with geophysical environment	Direct, in-situ and outdoor interactions with geophysical systems that depend on presence in the environmental setting	Characteristics of geophysical systems that enable activities promoting health, recuperation or enjoyment through passive or observational interactions	6.1.1.2	0
96	CICES (Geosystem outputs)	Cultural (Abiotic/geophysical)	Intellectual and representative interactions with geophysical environment	Direct, in-situ and outdoor interactions with geophysical systems that depend on presence in the environmental setting	Elements of geophysical systems that enable scientific investigation or the creation of traditional ecological knowledge	6.2.1.1	0
97	CICES (Geosystem outputs)	Cultural (Abiotic/geophysical)	Intellectual and representative interactions with geophysical environment	Direct, in-situ and outdoor interactions with geophysical systems that depend on presence in the environmental setting	Elements of geophysical systems that enable education and training	6.2.1.2	0
98	CICES (Geosystem outputs)	Cultural (Abiotic/geophysical)	Intellectual and representative interactions with geophysical environment	Direct, in-situ and outdoor interactions with geophysical systems that depend on presence in the environmental setting	Elements of geophysical systems that are resonant in terms of culture or heritage	6.2.1.3	0
99	CICES (Geosystem outputs)	Cultural (Abiotic/geophysical)	Intellectual and representative interactions with geophysical environment	Direct, in-situ and outdoor interactions with geophysical systems that depend on presence in the environmental setting	Elements of geophysical systems that enable aesthetic experiences	6.2.1.4	0
100	CICES (Geosystem outputs)	Cultural (Abiotic/geophysical)	Intellectual and representative interactions with geophysical environment	Indirect, interactions with geophysical systems	Elements of geophysical systems used for entertainment or representation outside the setting concerned	6.3.1.1	0
101	CICES (Geosystem outputs)	Cultural (Abiotic/geophysical)	Spiritual, symbolic and other interactions with geophysical environment	Elements of geophysical systems that are indirectly appreciated and have significance for people without their presence in the environmental setting.	Elements of geophysical systems that have symbolic meaning	6.4.1.1	0
102	CICES (Geosystem outputs)	Cultural (Abiotic/geophysical)	Spiritual, symbolic and other interactions with geophysical environment	Elements of geophysical systems that are indirectly appreciated and have significance for people without their presence in the environmental setting.	Elements of geophysical systems that have sacred or religious meaning	6.4.1.2	0
103	CICES (Geosystem outputs)	Cultural (Abiotic/geophysical)	Spiritual, symbolic and other interactions with geophysical environment	Other biophysical elements of species or ecosystems that are appreciated in their own right by people	Elements or features of geophysical systems whose contemporary existence or conservation is important to people	6.4.2.1	0
104	CICES (Geosystem outputs)	Cultural (Abiotic/geophysical)	Spiritual, symbolic and other interactions with geophysical environment	Other biophysical elements of species or ecosystems that are appreciated in their own right by people	Elements or features of geophysical systems whose inter-generational existence or conservation is important to people.	6.4.2.2	0
105	CICES (Geosystem outputs)	Cultural (Abiotic/geophysical)	Other characteristics of living systems that have cultural significance	Other	Other	6.5.X.X	0

## Sheet: Authors contributions
Authors	Conceptualization	Data curation	Formal analysis	Funding acquisition	Investigation	Methodology	Project administration	Resources	Software	Supervision	Validation	Visualization	Writing – original draft	Writing – review and editing
Andrea Schievano	1	1	1		1	1			1	1	1	1	1	1
Camille Rubeaud	1	1	1		1							1	1	1
Margret Kothke	1	1	1		1	1					1		1	1
Beatrice Landoni		1	1			1			1			1
Damien Beillouin			1						1		1	1		1
Marta Pérez-Soba	1	1								1				1
Simona Bosco						1
Rui Catarino			1			1			1					1
Jean-Michel Terres				1			1	1
David Makowski	1	1		1	1	1				1	1			1
Giovanni Tamburini		1		1
Sonja Kay	1	1		1						1	1	1	1	1
